# Supplementary material for: Late-glacial to late-Holocene shifts in global precipitation δ 18 O
Source: Copernicus journal article supplement (doi:10.5194/cp-11-1375-2015), 2015-10-14
Supplement: Supplementary file 1 [file cp-11-1375-2015-supplement.zip]

Archive with 3 entries (3 files):
- supplement.pdf
- groundwater_supplement.xls
- cp-11-1375-2015-supplement-title-page.pdf
