# Supplementary material for: Late-glacial to late-Holocene shifts in global precipitation δ 18 O
Source: Copernicus journal article supplement (doi:10.5194/cp-11-1375-2015), 2015-10-14
Supplement: Supplementary file 1 [file cp-11-1375-2015-supplement.zip › cp-11-1375-2015-supplement-title-page.pdf]

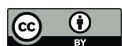

## *Supplement of*

# **Late-glacial to late-Holocene shifts in global precipitation $\delta^{18}\text{O}$**

**S. Jasechko et al.**

*Correspondence to:* S. Jasechko ([sjasechk@ucalgary.ca](mailto:sjasechk@ucalgary.ca))

- [cp-11-1375-2015-supplement-title-page.pdf](#)
- [groundwater\\_supplement.xls](#)
- [supplement.pdf](#)

The copyright of individual parts of the supplement might differ from the CC-BY 3.0 licence.
