# Supplementary material for: Late-glacial to late-Holocene shifts in global precipitation δ 18 O
Source: Copernicus journal article supplement (doi:10.5194/cp-11-1375-2015), 2015-10-14
Supplement: Supplementary file 1 [file cp-11-1375-2015-supplement.zip › groundwater_supplement.xls]

## Sheet: Sheet1
Aquifer	Lon.	Lat.	δ18Olate-Holocene (average)	δ18Olate-Holocene (±1 s.d.)	δ18Olate-glacial (average)	δ18Olate-glacial (±1 s.d.)	Δ18Olate-glacial (average)	Δ18Olate-glacial (±1 s.d.)
Uitenhage aquifer	25.5	-33.7	-4.7	0.2	-5.4	0.1	-0.8	0.2
Kalahari: Ntane	25.2	-24	-4.8		-5.6	0.1	-0.8	0.1
Lokalane-Nakojane	22	-22.3	-6		-7.2	0.1	-1.2	0.1
Botacatu: central	-48.7	-22.3	-8.9	1.4	-8.3	1	0.6	1.7
Omatako basin	17.9	-20.1	-8.6	0.7	-9	0.1	-0.4	0.7
Zimbabwe aquifer	28.1	-19.5	-5.9	0.4	-6.9	0.3	-1	0.5
Canning basin	125.1	-17.5	-7	1.7	-7.4	0.5	-0.5	1.8
Jakarta basin	106.8	-6.3	-6.1	0.1	-6	0.5	0.1	0.5
Potiguar basin	-37	-6.1	-1.8	1.2	-4.5	0.3	-2.7	1.3
Tiruvadanai aquifer	78.9	9.9	-3.9	0.5	-5.6	0.3	-1.7	0.6
Chad aquifer	18.3	11.2	-3.9	1.2	-5.6	0.6	-1.7	1.3
Cuddalore sandstone	79.5	11.4	-5.6	0.3	-4.9	0.6	0.7	0.7
Chad basin	12.8	12	-4	0.8	-6.2	0.5	-2.2	1
Taoudeni basin	-4.7	12.8	-5.1	0.6	-6	0.3	-0.9	0.7
Iullemeden: CT	2.7	13.6	-4.5	0.9	-7.3	0.3	-2.9	0.9
Mali aquifer	-7.2	15.2	-5.2	0.7	-6.5	0.5	-1.4	0.9
Senegalese CT	-16.4	15.2	-6.1	0.7	-6	0.5	0.1	0.8
Irhazer: CI	7.5	17.3	-5.1	1.8	-7.3	0.8	-2.3	2
Najd aquifer	53.9	18.1	-1.5	2.4	-4.7	0.7	-3.2	2.5
Djardo-Bilma	12.9	18.9	-7.8	4	-8.1	0.3	-0.2	4
Bengal basin	90.1	23.6	-4.9	1.1	-3.4	0.6	1.5	1.3
Batinah coastal plain	57.7	23.6	-2.4	1.2	-1.6	0.6	0.9	1.3
Nubian aquifer	28.7	25.9	-8.6	2	-10.4	0.3	-1.9	2.1
Al-Raudhatain and Damman aquifers	47.7	29.9	-2.7	0.4	-4.5	0.4	-1.8	0.6
Dead Sea rift valley	35.2	30.7	-4.7	0.1	-6.6	0.5	-1.8	0.6
Israel coastal aquifer	34.8	32	-4.8	0.4	-4.6	0.1	0.3	0.4
Floridan aquifer	-82.1	32	-4.7	0.2	-3.7	0.4	1	0.4
Great Oriental Erg: CI	5.9	32.4	-7.1	1	-8.4	0.3	-1.3	1.1
Kazan Trona Ore Field	32.5	40.1	-9.3	0.8	-12.1	0.6	-2.8	1
Souss Plain	-6.7	32.6	-6.2	0.9	-6.3	0.6	-0.1	1.1
Yuncheng basin	110.6	35	-8.7	1.3	-9.9	1	-1.1	1.7
High Plains Aquifer: South	-101.8	35.2	-6.3	0.7	-8.7	1.2	-2.4	1.3
Kairouan Plain	10	35.5	-5.5	0.3	-5.7	0.5	-0.2	0.6
Aleppo basin	37.3	35.9	-4.5	0.2	-7.2	0.8	-2.7	0.8
San Juan basin	-107.7	36.4	-12	0.6	-14.5	0.8	-2.5	1
High Plains: Central	-101	37.5	-9.3	1.6	-12	0.9	-2.7	1.8
North China Plain	115.4	38	-8.5	0.5	-10.8	0.4	-2.3	0.6
Sado basin	-8.5	38.3	-4.7	0.3	-4.7	0.1	0	0.3
Aquia aquifer	-76.6	38.7	-7	0.2	-7.1	0.3	-0.1	0.4
Mahomet aquifer	-88.8	39.9	-6.8	0.2	-7.2	0.5	-0.3	0.6
Idaho Batholith	-116.1	43.7	-16.5	0.7	-17.5	0.5	-1	0.8
Emilia Romagna plain	11	44.7	-8.3	0.5	-10.3	0.6	-1.9	0.8
Songnen plain	124.5	45.9	-10.4	1.4	-10.2	0.4	0.3	1.5
Aquitaine basin	-0.3	46.2	-5.7	0.2	-6.7	0.5	-1	0.6
Pannonian basin	20.1	46.3	-9.3	0.4	-13	0.3	-3.7	0.5
Columbia Flood Basalts	-119	46.6	-15.3	0.9	-18	0.6	-2.8	1.1
Great Hungarian Plain	20.8	47.6	-9.6		-11.3	0.5	-1.7	0.5
Lorraine sandstone	6.6	48.9	-8.9		-10	0.4	-1	0.4
Bathonian coast	-0.2	49.2	-6.6	0.1	-7.1	0.1	-0.5	0.2
Benkerstein	11.1	49.5	-9.3	0.2	-10.5	0.1	-1.3	0.2
Malm limestone	19.8	50	-10.2	0.4	-11.2	0.8	-1	0.9
Sokolov aquifer	12.7	50.2	-9.1	0.1	-9.5	0.4	-0.4	0.4
South Poland carbonates	19.2	50.6	-10.2	0.4	-11.4	0.8	-1.3	0.9
Ledo-Paniselian	3.7	51.2	-6.5	1.6	-7	0.2	-0.5	1.6
Chalk aquifer	-1.2	51.4	-7.4		-7.6	0.2	-0.2	0.2
Lincolnshire limestone	-0.3	52.8	-7.8	0.1	-8.1	0.3	-0.3	0.3
Ribe Formation	8.6	56.1	-7.9	0.1	-8.8	0.5	-0.8	0.5
Bykovsky Peninsula (ground ice)	129.4	71.8	-25.4		-30.8	1.3	-5.4	1.3
Near Dawson City (ground ice)	-139	63.9	-26.1	0.8	-31.5	0.4	-5.5	0.9
