# Supplementary material for: Late-glacial to late-Holocene shifts in global precipitation δ 18 O
Source: Copernicus journal article supplement (doi:10.5194/cp-11-1375-2015), 2015-10-14
Supplement: Supplementary file 1 [file cp-11-1375-2015-supplement.zip › supplement.pdf]

## Supporting Online Information

This document presents groundwater age dating methods (S1),  $\Delta^{18}\text{O}_{\text{late-glacial}}$  calculation details (S2), inter-model simulation details (S3) and tabulated data and sources (S4).

### **S1. Groundwater age dating**

Mean  $^{14}\text{C}$ -based groundwater ages ( $t$ , the time elapsed since recharge) were calculated for each groundwater sample by accounting for the radioactive decay of  $^{14}\text{C}$  and for the dissolution of  $^{14}\text{C}$ -dead aquifer materials (Clark and Fritz, 1997):

$$t = -8033 \times \ln\left(\frac{A}{q \times A_o}\right) \quad \text{Equation S1.}$$

where  $t$  is the time elapsed since the groundwater sample recharged (i.e., groundwater age),  $A$  is the measured  $^{14}\text{C}$  activity in a groundwater sample,  $A_o$  is the initial  $^{14}\text{C}$  activity ( $\sim 100$  pmC) and  $q$  is a correction factor applied to account for the dissolution of aquifer material with zero  $^{14}\text{C}$  (i.e.,  $^{14}\text{C}$ -dead). In cases where  $\delta^{13}\text{C}$  data was available  $q$  was calculated as:

$$q = \frac{\delta^{13}\text{C}_{\text{measured}} - \delta^{13}\text{C}_{\text{aquifer}}}{\delta^{13}\text{C}_{\text{recharge}} - \delta^{13}\text{C}_{\text{aquifer}}} \quad \text{Equation S2.}$$

where  $\delta^{13}\text{C}_{\text{measured}}$ ,  $\delta^{13}\text{C}_{\text{aquifer}}$  and  $\delta^{13}\text{C}_{\text{recharge}}$  represent the carbon isotope composition of a groundwater sample, the aquifer and recharging groundwater.  $\delta^{13}\text{C}_{\text{aquifer}}$  was set to  $1.0 \pm 3.4$  ‰ PDB (average  $\pm 1$  s.d.) as determined by  $\delta^{13}\text{C}$  values of 16359 rock and sediment samples (Veizer et al., 1999).  $\delta^{13}\text{C}_{\text{recharge}}$  was set to  $-12.6 \pm 4.3$  ‰ PDB (average  $\pm 1$  s.d.) as determined by 120 groundwater samples having a  $^{14}\text{C}$  activity of greater than 90 p.m.C. compiled in this study (i.e., recently recharged water bearing near-atmospheric radioactive activities; Burchuladze et al., 1989).  $q$  was set to  $0.76 \pm 0.41$  in cases where  $\delta^{13}\text{C}_{\text{measured}}$  data were unavailable, as determined by the most common  $\delta^{13}\text{C}$ -based  $q$  values ( $q = 0.76 \pm 0.41$  represents the average and

one standard deviation of all  $\delta^{13}\text{C}$ -based  $q$  values calculated in this compilation). Uncertainties in groundwater ages were calculated by Gaussian error propagation (calculated values of  $q$  exceeding 1 were set to a value of 1). The  $\delta^{13}\text{C}_{\text{recharge}}$  and  $\delta^{13}\text{C}_{\text{aquifer}}$  ranges do not encompass all possible geochemical scenarios, and likely introduce additional errors into our groundwater age dates.

Equivalent calendar year ages were estimated from  $^{14}\text{C}$ -ages by applying a polynomial fit of compiled  $^{14}\text{C}$ -to-calender age corrections (Reimer et al., 2013). Samples were then divided into two age categories: (i) the late-Holocene ( $^{14}\text{C}$ -based age of less than 5,000 calendar years before present, or having a  $^3\text{H}$  activity of greater than 4 T.U., indicating modern recharge), or (ii) the late-glacial ( $^{14}\text{C}$ -based age of 20,000 to less than ~50,000 calendar years before present and samples with  $^{14}\text{C}$  activities below analytical detection). An upper late-glacial limit of less than ~50,000 years before present was set because of limitations with  $^{14}\text{C}$  age calculations, even though the most recent ice age extends to ~110,000 years before present (Lisiecki and Raymo, 2005). However,  $^{14}\text{C}$ -based ages cannot distinguish ~50,000 year old water from much older groundwaters on the order of  $10^5$  years before present, meaning that some of the last glacial period groundwater samples may represent older glacial climates (e.g.,  $^{36}\text{Cl}$ -based versus  $^{14}\text{C}$ -based ages presented by Kulongoski et al., 2004).

## **S2. $\Delta^{18}\text{O}_{\text{late-glacial}}$ calculation**

$\Delta^{18}\text{O}_{\text{late-glacial}}$  values (defined as  $\Delta^{18}\text{O}_{\text{late-glacial}} = \delta^{18}\text{O}_{\text{late-glacial}} - \delta^{18}\text{O}_{\text{late-Holocene}}$ ) were analyzed on an aquifer-by-aquifer basis. Comparisons of isotopic data for the late-glacial and the late-Holocene were made by subtracting median  $\delta^{18}\text{O}$  and  $\delta^2\text{H}$  values from each age group, with uncertainties representing error propagation of one standard deviation of  $\delta^{18}\text{O}$  and  $\delta^2\text{H}$  values for the two data groups (i.e., late-Holocene and last glacial period age groups). Samples were

omitted from our analysis if they exhibited an evaporative signature ( $\delta^2\text{H} - 8 \times \delta^{18}\text{O}$  of less than 0), contained a mixture of modern and late-glacial groundwater ( $^3\text{H}$  activity of greater than 1 tritium unit and a  $^{14}\text{C}$ -age of more than 20,000 calendar years before present), were suspected to have mixed with intruding seawater (e.g., Geyh and Söfner, 1989; Bouchaou et al., 2008) or were presumed to have been recharged by subglacial meltwaters beneath the Fennoscandinavian (e.g., Karro et al., 2004) or the Laurentide (e.g., Grasby and Chen, 2005; Ferguson et al., 2007; Stotler et al., 2010) ice sheets (review by McIntosh et al., 2012).

Ice core and speleothem  $\Delta^{18}\text{O}_{\text{late-glacial}}$  values were calculated by comparing  $\delta^{18}\text{O}$  values from the late-Holocene (<5,000 years before present) and the latter half of the late-glacial (20,000 to ~50,000 years before present). A threshold of less than ~50,000 years before present was selected as an upper limit for the latter half of the last ice age  $\delta^{18}\text{O}$  value for consistency with the groundwater records. Speleothem  $\Delta^{18}\text{O}_{\text{late-glacial}}$  values were corrected to account for different temperatures during the late-glacial relative to the late-Holocene that impact the water-calcite isotopic fractionation factor. Temperature-based  $\text{H}_2\text{O}$ - $\text{CaCO}_3$  fractionation factors were obtained from O'Neil et al. (1969) with temperatures calculated under the assumption that atmospheric temperatures are indicative of temperatures in the shallow subsurface. Temperatures for the late-Holocene were assumed to be equivalent to modern mean annual near surface temperatures (New et al., 2002), potentially introducing <1°C of error because of temperature change throughout the last 5,000 years (Marcott et al., 2013). Adding 1°C of added uncertainty into late-Holocene temperature equates to an added  $\pm 0.4$  ‰ ( $\delta^{18}\text{O}$ ) of uncertainty in the temperature-corrected difference between the late-glacial and the late-Holocene  $\delta^{18}\text{O}$  values (O'Neil et al., 1969). Last glacial period temperatures were calculated by applying the temperature offset of the last glacial maximum (Figure 1; Annan and Hargreaves, 2013) to gridded values of modern mean annual air temperatures (New et al., 2002).

### **S3. Simulated precipitation $\delta^{18}\text{O}$**

Simulated precipitation  $\Delta^{18}\text{O}_{\text{late-glacial}}$  values compiled from five general circulation models are reported in this study. Table S1 describes model-specific parameterizations, input data and boundary conditions.

### **S4. Groundwater, speleothem and ice core isotope records**

Tabulated paleowater isotope records of groundwater (Tables S2 to S3), speleothem (Table S4), glacier ice (Table S5) and ground ice (Table S6) records presented in the following supplemental tables.

### **S5. Groundwater $\delta^{18}\text{O}$ change over time**

Figures S1 – S57 present groundwater  $\delta^{18}\text{O}$  variations from the last ice age to present day for 57 globally-distributed aquifer systems (two ground ice records not included in this series of plots). Figures S1 to S57 are sorted by alphabetically by country title. Exact ages for Germany's Benker-sandstein aquifer are not available, however, the stable isotope data two data clusters are interpreted to be representative of late-Holocene and Pleistocene climate states (Figure S20, van Geldern et al., 2014). The most recent age end member for the late-glacial time period—usually set to 20,000 years before present—was set to 22,000 years before present for the Pannonian Basin to avoid samples with  $^{14}\text{C}$ -ages between 20,000 and 22,000 years before present showing evidence of groundwater mixing (Figure S22; Varsanyi et al., 2011). Aleppo Basin (Syria) and Mahomet Aquifer (USA) groundwaters having a  $\delta^{13}\text{C}$ -based  $q$  values of less than 0.3 were not included in our analysis on the basis of highly uncertain groundwater ages at low values of  $q$  (Figures S44 and S55; Hackley et al., 2010; Al-Charideh, 2012; Stadler et al., 2012). Late-glacial to late-Holocene  $\delta^{18}\text{O}$  and  $\delta^2\text{H}$  shifts are shown in Figure S58 for 44 aquifers.

92 **Table S1.** Information for isotope enabled general circulation models compiled in this study

| <b>Model name:</b>                                  | <b>CAM3iso</b>                                                                                       | <b>ECHAM5-wiso</b>                                                                                                                                                                        | <b>GISSE2-R, NINT</b>                         | <b>IsoGSM</b>                                                                                                                                                                                                  | <b>LMDZ4</b>                                                                                                                                                                                                   |
|-----------------------------------------------------|------------------------------------------------------------------------------------------------------|-------------------------------------------------------------------------------------------------------------------------------------------------------------------------------------------|-----------------------------------------------|----------------------------------------------------------------------------------------------------------------------------------------------------------------------------------------------------------------|----------------------------------------------------------------------------------------------------------------------------------------------------------------------------------------------------------------|
| <b>Reference for model:</b>                         | Collins et al., 2006                                                                                 | Roeckner et al., 2006                                                                                                                                                                     | Schmidt et al., 2014                          | Kanamitsu et al., 2002                                                                                                                                                                                         | Hourdin et al., 2006                                                                                                                                                                                           |
| <b>Reference for isotopic version:</b>              | Noone and Sturm, 2009; Sturm et al., 2010                                                            | Werner et al., 2011                                                                                                                                                                       | LeGrande and Schmidt, 2009 *                  | Yoshimura et al., 2008                                                                                                                                                                                         | Risi et al., 2010                                                                                                                                                                                              |
| <b>Forced or coupled simulation:</b>                | Forced                                                                                               | Forced                                                                                                                                                                                    | Coupled                                       | Forced                                                                                                                                                                                                         | Forced                                                                                                                                                                                                         |
| <b>Sea surface temperature forcing (if forced):</b> | Monthly-mean anomalies from a LGM simulation by the CCSM3 coupled model (Otto-Bliesner et al., 2006) | Monthly-mean anomalies from GLAMAP reconstruction (footnote: LGM anomalies were calculated with respect to a pre-industrial simulation, and added to present-day observed SSTs from AMIP) | N/A                                           | Monthly-mean anomalies from a LGM simulation by the IPSL coupled model (footnote: LGM anomalies were calculated with respect to a pre-industrial simulation, and added to present-day observed SSTs from AMIP) | Monthly-mean anomalies from a LGM simulation by the IPSL coupled model (footnote: LGM anomalies were calculated with respect to a pre-industrial simulation, and added to present-day observed SSTs from AMIP) |
| <b>Sea ice forcing (if forced):</b>                 | Same as SSTs                                                                                         | Same as SSTs                                                                                                                                                                              | N/A                                           | Same as SSTs                                                                                                                                                                                                   | Same as SSTs                                                                                                                                                                                                   |
| <b>Climatological or inter-annual forcing:</b>      | Climatological (average over 100 years)                                                              | Climatological                                                                                                                                                                            | N/A                                           | Climatological (average over 30 years)                                                                                                                                                                         | Climatological (average over 30 years)                                                                                                                                                                         |
| <b>Topography/land ice:</b>                         | Ice 5G (Peltier, 1994)                                                                               | As advised by PMIP3 (Braconnot et al., 2012)                                                                                                                                              | Ice 5.2G, with LIS of Licciardi et al. (1998) | Ice 5G (Peltier, 1994)                                                                                                                                                                                         | Ice 5G (Peltier, 1994)                                                                                                                                                                                         |

| <b>Model name:</b>                                         | <b>CAM3iso</b>                | <b>ECHAM5-wiso</b>                     | <b>GISSE2-R, NINT</b>                                                                                                                      | <b>IsoGSM</b>                                                                        | <b>LMDZ4</b>                    |
|------------------------------------------------------------|-------------------------------|----------------------------------------|--------------------------------------------------------------------------------------------------------------------------------------------|--------------------------------------------------------------------------------------|---------------------------------|
| <b>Aerosol:</b>                                            | Pre-industrial                | None                                   | NINT physics (Koch et al., 2011; Shindell et al., 2006) and includes a tuned aerosol indirect effect (AIE) following (Hansen et al., 2005) | None                                                                                 | None                            |
| <b>Solar/orbital forcing:</b>                              | PMIP2 protocol                | PMIP3 protocol                         | PMIP3 protocol                                                                                                                             | PMIP2 protocol                                                                       | PMIP2 protocol                  |
| <b>Number of years:</b>                                    | 15                            | 12 years and last 10 years average     | 1500                                                                                                                                       | 30 years and last 20 years average                                                   | 3                               |
| <b>Horizontal resolution:</b>                              | 2.8° x 2.8°                   | 1.1° x 1.1° (T106 spectral resolution) | Atmosphere: 2.0° x 2.5°; Ocean: 1.0° x 1.25°                                                                                               | 1.8° x 1.8° (T62 spectral resolution)                                                | 2.5° latitude x 3.75° longitude |
| <b>Vertical resolution:</b>                                | 26 levels                     | 31 levels                              | Ocean: 26 levels; atmosphere: 40 levels, top at 0.1 mb                                                                                     | 28 levels                                                                            | 19 levels                       |
| <b>Seawater <math>\delta^{18}\text{O}</math> (modern):</b> | 0 ‰, globally constant        | LeGrande and Schmidt, 2006             | 0 ‰ mean, but coupled                                                                                                                      | 0 ‰, globally constant                                                               | 0.5 ‰, globally constant        |
| <b>Seawater <math>\delta^{18}\text{O}</math> (LGM):</b>    | +1.1‰ with respect to present | +1‰ with respect to present            | +1‰ with respect to present, but coupled                                                                                                   | 0 permil, globally constant; +1 per mille added after to account for seawater change | +1.2 ‰ with respect to present  |

\* Last Glacial Maximum simulation described in Ullman et al. (2014)

| Country      | Aquifer                           | Citation(s)                                                                                  |
|--------------|-----------------------------------|----------------------------------------------------------------------------------------------|
| Algeria      | Great Oriental Erg: CI            | Edmunds et al., 2003                                                                         |
| Botswana     | Kalahari: Ntane                   | Kulongoski et al., 2004                                                                      |
| Botswana     | Lokalane-Nakojane                 | Rahube, 2003                                                                                 |
| Burkina Faso | Taoudeni basin                    | Huneau et al., 2011                                                                          |
| Chad         | Chad aquifer                      | Edmunds, 2009                                                                                |
| Egypt        | Nubian aquifer                    | Shehata and Al-Ruwaih, 1999; Patterson et al., 2005; Edmunds, 2009                           |
| Mali         | Mali aquifer                      | Edmunds, 2009                                                                                |
| Morocco      | Souss Plain                       | Bouchaou et al., 2008                                                                        |
| Namibia      | Omatako basin                     | Külls, 2000                                                                                  |
| Niger        | Djardo-Bilma                      | Dodo and Zuppi, 1997; 1999                                                                   |
| Niger        | Irhazer: CI                       | Andrews et al., 1994; Edmunds et al., 2004                                                   |
| Niger        | Iullemeden: CT                    | Le Gal La Salle et al., 2001; Beyerle et al., 2003                                           |
| Nigeria      | Chad basin                        | Maduabuchi et al., 2006                                                                      |
| Senegal      | Senegalese CT                     | Castany et al., 1974; Edmunds, 2009                                                          |
| South Africa | Uitenhage aquifer                 | Heaton et al., 1986                                                                          |
| Tunisia      | Kairouan Plain                    | Derwich et al., 2012                                                                         |
| Zimbabwe     | Zimbabwe aquifer                  | Larsen et al., 2002                                                                          |
| Australia    | Canning basin                     | Harrington et al., 2011                                                                      |
| Bangladesh   | Bengal basin                      | Aggarwal et al., 2000; Sikdar and Sahu, 2009; Majumder et al., 2011; Hoque and Burgess, 2012 |
| China        | Songnen Plain                     | Chen et al., 2011                                                                            |
| China        | North China Plain                 | Zongyu et al., 2003; Kreuzer et al., 2009                                                    |
| China        | Yuncheng basin                    | Currell et al., 2010                                                                         |
| India        | Cuddalore sandstone               | Sukhija et al., 1998                                                                         |
| India        | Tiruvadanai aquifer               | Kumar et al., 2009                                                                           |
| Indonesia    | Jakarta basin                     | Geyh and Söfner, 1989                                                                        |
| Israel       | Israel coastal aquifer            | Yechieli et al., 2009                                                                        |
| Israel       | Dead Sea rift valley              | Gat and Galai, 1982; Mazor et al., 1995                                                      |
| Kuwait       | Al-Raudhatain and Damman aquifers | Al-Ruwaih and Shehata, 2004; Fadlelmawla et al., 2008                                        |
| Oman         | Batinah coastal plain             | Weyhenmeyer et al., 2000; 2002                                                               |
| Oman         | Najd aquifer                      | Clark et al., 1987; Al-Mashaikhi et al., 2012                                                |
| Syria        | Aleppo basin                      | Al-Charideh, 2012; Stadler et al., 2012                                                      |
| Belgium      | Ledo-Paniselian                   | Walraevens, 1990; Walraevens et al., 2001                                                    |
| Czech Rep.   | Sokolov aquifer                   | Noseck et al., 2009                                                                          |
| Denmark      | Ribe Formation                    | Hinsby et al., 2001                                                                          |
| France       | Bathonian coast                   | Barbecot et al., 2000                                                                        |
| France       | Lorraine sandstone                | Celle-Jeanton et al., 2009                                                                   |
| France       | Aquitaine basin                   | Le Gal La Salle et al., 1996                                                                 |
| Germany      | Benker-Sandstein                  | van Geldern et al., 2014                                                                     |

| Country        | Aquifer                | Citation(s)                                                      |
|----------------|------------------------|------------------------------------------------------------------|
| Hungary        | Great Hungarian Plain  | Stute and Deak, 1989                                             |
| Hungary        | Pannonian basin        | Varsanyi et al., 2011                                            |
| Italy          | Emilia-Romagna Plain   | Martinelli et al., 2011                                          |
| Poland         | S. Poland carbonates   | Samborska et al., 2013                                           |
| Poland         | Malm limestone         | Zuber et al., 2004                                               |
| Portugal       | Sado basin             | Galego Fernandes and Carreira, 2008                              |
| Turkey         | Kazan Trona Ore Field  | Arslan et al., 2014                                              |
| United Kingdom | Lincolnshire limestone | Darling et al., 1997                                             |
| United Kingdom | Chalk aquifer          | Darling and Bath, 1988; Dennis et al., 1997; Elliot et al., 1999 |
| U.S.A.         | Columbia Flood Bslts.* | Douglas et al., 2007; Brown et al., 2010                         |
| U.S.A.         | Idaho Batholith        | Schlegel et al., 2009                                            |
| U.S.A.         | Mahomet aquifer        | Hackley et al., 2010                                             |
| U.S.A.         | Aquia aquifer          | Aeschbach-Hertig et al., 2002                                    |
| U.S.A.         | High Plains: Central   | Dutton, 1995; Clark et al. 1998                                  |
| U.S.A.         | High Plains: South     | Dutton, 1995; Mehta et al., 2000                                 |
| U.S.A.         | San Juan Basin         | Phillips et al., 1986                                            |
| U.S.A.         | Floridan aquifer       | Clark et al., 1997                                               |
| Brazil         | Potiguar basin: Acu    | Salati et al., 1974                                              |
| Brazil         | Botacatu: central      | Gouvea da Silva, 1983                                            |
| Russia         | Bykovsky Peninsula**   | Meyer et al., 2002                                               |
| Canada         | Near Dawson City***    | Kotler and Burn, 2000                                            |

\* Columbia Flood Basalt late-glacial groundwater may be glacial Lake Missoula floodwaters rather than regional precipitation (Brown et al., 2010).

\*\* Ground ice record – comparison of ice wedge  $\delta^{18}\text{O}$  values <1m from edge (Holocene) and inner-most (2.5m – 5m; Pleistocene) samples (horizontal ice wedge sample transect MKh-3).

\*\*\* Ground ice record – comparison of ground ice  $\delta^{18}\text{O}$  values from the Dago Hill (Holocene) and Quartz Creek (Pleistocene) formations.

**Table S3.** Groundwater  $\delta^{18}\text{O}_{\text{late-Holocene}}$  and  $\delta^{18}\text{O}_{\text{late-glacial}}$  values

| Country      | Aquifer                           | Lon. | Lat. | $\delta^{18}\text{O}_{\text{late-Holo.}}$ | $\delta^{18}\text{O}_{\text{glacial}}$ | $\Delta^{18}\text{O}_{\text{glacial}}$ |
|--------------|-----------------------------------|------|------|-------------------------------------------|----------------------------------------|----------------------------------------|
| Australia    | Canning basin                     | 125  | -17  | $-7.0 \pm 1.7$                            | $-7.4 \pm 0.5$                         | $-0.5 \pm 1.8$                         |
| Indonesia    | Jakarta basin                     | 107  | -6   | $-6.1 \pm 0.1$                            | $-6.0 \pm 0.5$                         | $0.1 \pm 0.5$                          |
| Bangladesh   | *Bengal basin                     | 90   | 24   | $-4.9 \pm 1.1$                            | $-3.4 \pm 0.6$                         | $1.5 \pm 1.3$                          |
| China        | Songnen plain                     | 125  | 46   | $-10.4 \pm 1.4$                           | $-10.2 \pm 0.4$                        | $0.3 \pm 1.5$                          |
| China        | *North China Plain                | 115  | 38   | $-8.5 \pm 0.5$                            | $-10.8 \pm 0.4$                        | $-2.3 \pm 0.6$                         |
| China        | Yuncheng basin                    | 111  | 35   | $-8.7 \pm 1.3$                            | $-9.9 \pm 1.0$                         | $-1.1 \pm 1.7$                         |
| India        | *Cuddalore sandstone              | 80   | 11   | $-5.6 \pm 0.3$                            | $-4.9 \pm 0.6$                         | $0.7 \pm 0.7$                          |
| India        | *Tiruvadanai aquifer              | 79   | 10   | $-3.9 \pm 0.5$                            | $-5.6 \pm 0.3$                         | $-1.7 \pm 0.6$                         |
| Algeria      | *Great Oriental Erg: CI           | 6    | 32   | $-7.1 \pm 1.0$                            | $-8.4 \pm 0.3$                         | $-1.3 \pm 1.1$                         |
| Botswana     | *Kalahari: Ntane                  | 25   | -24  | $-4.8 \pm 0.0$                            | $-5.6 \pm 0.1$                         | $-0.8 \pm 0.1$                         |
| Botswana     | *Lokalane-Nakojane                | 22   | -22  | $-6.0 \pm 0.0$                            | $-7.2 \pm 0.1$                         | $-1.2 \pm 0.1$                         |
| Burkina Faso | *Taoudeni basin                   | -5   | 13   | $-5.1 \pm 0.6$                            | $-6.0 \pm 0.3$                         | $-0.9 \pm 0.7$                         |
| Chad         | *Chad aquifer                     | 18   | 11   | $-3.9 \pm 1.2$                            | $-5.6 \pm 0.6$                         | $-1.7 \pm 1.3$                         |
| Egypt        | Nubian aquifer                    | 29   | 26   | $-8.6 \pm 2.0$                            | $-10.4 \pm 0.3$                        | $-1.9 \pm 2.1$                         |
| Mali         | Mali aquifer                      | -7   | 15   | $-5.2 \pm 0.7$                            | $-6.5 \pm 0.5$                         | $-1.4 \pm 0.9$                         |
| Morocco      | Souss Plain                       | -7   | 33   | $-6.2 \pm 0.9$                            | $-6.3 \pm 0.6$                         | $-0.1 \pm 1.1$                         |
| Namibia      | Omatako basin                     | 18   | -20  | $-8.6 \pm 0.7$                            | $-9.0 \pm 0.1$                         | $-0.4 \pm 0.7$                         |
| Niger        | Djardo-Bilma                      | 13   | 19   | $-7.8 \pm 4.0$                            | $-8.1 \pm 0.3$                         | $-0.2 \pm 4.0$                         |
| Niger        | *Irhazer: CI                      | 7    | 17   | $-5.1 \pm 1.8$                            | $-7.3 \pm 0.8$                         | $-2.3 \pm 2.0$                         |
| Niger        | *Iullemeden: CT                   | 3    | 14   | $-4.5 \pm 0.9$                            | $-7.3 \pm 0.3$                         | $-2.9 \pm 0.9$                         |
| Nigeria      | *Chad basin                       | 13   | 12   | $-4.0 \pm 0.8$                            | $-6.2 \pm 0.5$                         | $-2.2 \pm 1.0$                         |
| Senegal      | Senegalese CT                     | -16  | 15   | $-6.1 \pm 0.7$                            | $-6.0 \pm 0.5$                         | $0.1 \pm 0.8$                          |
| S. Africa    | *Uitenhage aquifer                | 25   | -34  | $-4.7 \pm 0.2$                            | $-5.4 \pm 0.1$                         | $-0.8 \pm 0.2$                         |
| Tunisia      | Kairouan Plain                    | 10   | 35   | $-5.5 \pm 0.3$                            | $-5.7 \pm 0.5$                         | $-0.2 \pm 0.6$                         |
| Zimbabwe     | *Zimbabwe aquifer                 | 28   | -20  | $-5.9 \pm 0.4$                            | $-6.9 \pm 0.3$                         | $-1.0 \pm 0.5$                         |
| Kuwait       | Al-Raudhatain and Damman aquifers | 48   | 30   | $-2.7 \pm 0.4$                            | $-4.5 \pm 0.4$                         | $-1.8 \pm 0.6$                         |
| Oman         | Batinah coastal plain             | 58   | 24   | $-2.4 \pm 1.2$                            | $-1.6 \pm 0.6$                         | $0.9 \pm 1.3$                          |
| Oman         | *Najd aquifer                     | 54   | 18   | $-1.5 \pm 2.4$                            | $-4.7 \pm 0.7$                         | $-3.2 \pm 2.5$                         |
| Syria        | *Aleppo basin                     | 37   | 36   | $-4.5 \pm 0.2$                            | $-7.2 \pm 0.8$                         | $-2.7 \pm 0.8$                         |
| Belgium      | Ledo-Paniselian                   | 4    | 51   | $-6.5 \pm 1.6$                            | $-7.0 \pm 0.2$                         | $-0.5 \pm 1.6$                         |
| Czech Rep.   | Sokolov aquifer                   | 13   | 50   | $-9.1 \pm 0.1$                            | $-9.5 \pm 0.4$                         | $-0.4 \pm 0.4$                         |
| Denmark      | Ribe Formation                    | 9    | 56   | $-7.9 \pm 0.1$                            | $-8.8 \pm 0.5$                         | $-0.8 \pm 0.5$                         |
| France       | *Bathonian coast                  | 0    | 49   | $-6.6 \pm 0.1$                            | $-7.1 \pm 0.1$                         | $-0.5 \pm 0.2$                         |
| France       | *Lorraine sandstone               | 7    | 49   | $-8.9 \pm 0.0$                            | $-10.0 \pm 0.4$                        | $-1.0 \pm 0.4$                         |
| France       | Aquitaine basin                   | 0    | 46   | $-5.7 \pm 0.2$                            | $-6.7 \pm 0.5$                         | $-1.0 \pm 0.6$                         |
| Germany      | *Benkerstein                      | 11   | 49   | $-9.3 \pm 0.2$                            | $-10.5 \pm 0.1$                        | $-1.3 \pm 0.2$                         |
| Hungary      | *Great Hungarian Plain            | 21   | 48   | $-9.6 \pm 0.0$                            | $-11.3 \pm 0.5$                        | $-1.7 \pm 0.5$                         |
| Hungary      | *Pannonian basin                  | 20   | 46   | $-9.3 \pm 0.4$                            | $-13.0 \pm 0.3$                        | $-3.7 \pm 0.5$                         |
| Italy        | *Emilia Romagna plain             | 11   | 45   | $-8.3 \pm 0.5$                            | $-10.3 \pm 0.6$                        | $-1.9 \pm 0.8$                         |
| Israel *     | Israel coastal aquifer            | 35   | 32   | $-4.8 \pm 0.4$                            | $-4.6 \pm 0.1$                         | $0.3 \pm 0.4$                          |
| Israel       | *Dead Sea rift valley             | 35   | 31   | $-4.7 \pm 0.1$                            | $-6.6 \pm 0.5$                         | $-1.8 \pm 0.6$                         |

| Country  | Aquifer                 | Lon. | Lat. | $\delta^{18}\text{O}_{\text{late-Holo.}}$ | $\delta^{18}\text{O}_{\text{glacial}}$ | $\Delta^{18}\text{O}_{\text{glacial}}$ |
|----------|-------------------------|------|------|-------------------------------------------|----------------------------------------|----------------------------------------|
| Poland   | *S. Poland carbonates   | 19   | 51   | $-10.2 \pm 0.4$                           | $-11.4 \pm 0.8$                        | $-1.3 \pm 0.9$                         |
| Poland   | *Malm limestone         | 20   | 50   | $-10.2 \pm 0.4$                           | $-11.2 \pm 0.8$                        | $-1.0 \pm 0.9$                         |
| Portugal | Sado basin              | -9   | 38   | $-4.7 \pm 0.3$                            | $-4.7 \pm 0.1$                         | $0.0 \pm 0.3$                          |
| Turkey   | *Kazan Trona Ore Field  | 40   | 33   | $-9.3 \pm 0.8$                            | $-12.1 \pm 0.6$                        | $-2.8 \pm 1.0$                         |
| U.K.     | *Lincolnshire limestone | 0    | 53   | $-7.8 \pm 0.1$                            | $-8.1 \pm 0.3$                         | $-0.3 \pm 0.3$                         |
| U.K.     | Chalk aquifer           | -1   | 51   | $-7.4 \pm 0.0$                            | $-7.6 \pm 0.2$                         | $-0.2 \pm 0.2$                         |
| Brazil   | Potiguar basin: Acu     | -37  | -6   | $-1.8 \pm 1.2$                            | $-4.5 \pm 0.3$                         | $-2.7 \pm 1.3$                         |
| Brazil   | Botacatu: central       | -49  | -22  | $-8.9 \pm 1.4$                            | $-8.3 \pm 1.0$                         | $0.6 \pm 1.7$                          |
| U.S.A.   | *Columbia Flood Bslts   | -119 | 47   | $-15.3 \pm 0.9$                           | $-18.0 \pm 0.6$                        | $-2.8 \pm 1.1$                         |
| U.S.A.   | *Idaho Batholith        | -116 | 44   | $-16.5 \pm 0.7$                           | $-17.5 \pm 0.5$                        | $-1.0 \pm 0.8$                         |
| U.S.A.   | *San Juan Basin         | -108 | 36   | $-12.0 \pm 0.6$                           | $-14.5 \pm 0.8$                        | $-2.5 \pm 1.0$                         |
| U.S.A.   | Mahomet aquifer         | -89  | 40   | $-6.8 \pm 0.2$                            | $-7.2 \pm 0.5$                         | $-0.3 \pm 0.6$                         |
| U.S.A.   | *High Plains: Central   | -101 | 38   | $-9.3 \pm 1.6$                            | $-12.0 \pm 0.9$                        | $-2.7 \pm 1.8$                         |
| U.S.A.   | *High Plains: South     | -102 | 35   | $-6.3 \pm 0.7$                            | $-8.7 \pm 1.2$                         | $-2.4 \pm 1.3$                         |
| U.S.A.   | Aquia aquifer           | -77  | 39   | $-7.0 \pm 0.2$                            | $-7.1 \pm 0.3$                         | $-0.1 \pm 0.4$                         |
| U.S.A.   | *Floridan aquifer       | -82  | 32   | $-4.7 \pm 0.2$                            | $-3.7 \pm 0.4$                         | $1.0 \pm 0.4$                          |
| Russia   | Bykovsky Peninsula      | 129  | 72   | $-25.4$                                   | $-30.8 \pm 1.3$                        | $-5.4 \pm 1.3$                         |
| Canada   | *Near Dawson City       | -139 | 64   | $-26.1 \pm 0.8$                           | $-31.5 \pm 0.4$                        | $-5.5 \pm 0.9$                         |

\* aquifers where  $\delta^{18}\text{O}_{\text{late-Holocene}}$  values are statistically distinct ( $p < 0.05$ ) from  $\delta^{18}\text{O}_{\text{late-glacial}}$  values (two tailed heteroscedastic t-test comparing  $\delta^{18}\text{O}_{\text{late-Holo.}}$  values with  $\delta^{18}\text{O}_{\text{late-glacial}}$  values). 34 of 57 (60%) groundwater records show a significant change in  $\delta^{18}\text{O}$  from the late-Holocene (<5,000 calendar years before present) to the latter half of the last glacial period (>20,000 calendar years before present). Of the 34 aquifers having significant ( $p < 0.05$ ) shifts between the late-Holocene and the last glacial period, 31 aquifers have a  $\Delta^{18}\text{O}_{\text{late-glacial}}$  values of less than zero (exceptions Bengal Basin (Bangladesh), Floridan Aquifer (USA) and the Cuddalore Sandstone (India)).

<sup>x</sup> Some samples show evidence of seawater intrusion and were excluded on the basis of total dissolved solids, where samples exceeding 2,000 mg/L were excluded.

113 **Table S4.** Speleothem  $\delta^{18}\text{O}$  change from the late-glacial to the late-Holocene

| Cave                           | Cntry.       | Reference                                  | Lon.   | Lat.  | $\Delta^{18}\text{O}_{\text{late-glacial}}$ | Corr. <sup>x</sup> |
|--------------------------------|--------------|--------------------------------------------|--------|-------|---------------------------------------------|--------------------|
| Gunung Buda                    | Borneo       | Partin et al., 2007                        | 114.8  | 4.0   | +2.0±0.3                                    | -0.9±0.2           |
| Botuverá Cave                  | Brazil       | Cruz et al., 2005;<br>Wang et al., 2007    | -49.2  | -27.2 | -0.7±0.4                                    | -0.9±0.2           |
| Dongge <sup>t</sup>            | China        | Dykoski et al., 2005;<br>Yuan et al., 2004 | 108.1  | 25.3  | +2.6±0.5                                    | -0.9±0.2           |
| Hulu <sup>*</sup>              | China        | Wang et al., 2001                          | 119.2  | 32.5  | +1.6±0.3                                    | -1.0±0.2           |
| Jiuxian <sup>t</sup>           | China        | Cai et al., 2010                           | 109.1  | 33.6  | +1.3±1.9                                    | -1.0±0.2           |
| Yaman <sup>t</sup>             | China        | Yang et al., 2010                          | 107.9  | 24.5  | +2.7±0.5                                    | -0.9±0.2           |
| Soreq                          | Israel       | Bar-Matthews et al., 2003                  | 35.0   | 31.5  | +2.3±0.2                                    | -1.0±0.1           |
| Pegim <sup>*</sup>             | Israel       | Bar-Matthews et al., 2003                  | 35.2   | 32.6  | +2.0±0.5                                    | -0.9±0.2           |
| Jerusalem W                    | Israel       | Frumkin et al., 1999                       | 35.2   | 31.7  | +1.8±0.6                                    | -1.0±0.2           |
| NW South Island                | New Zealand  | Williams et al., 2010                      | 172.0  | -42.0 | +0.4±0.2                                    | -1.0±0.3           |
| Cold Air Cave                  | South Africa | Holmgren et al., 2003                      | 29.1   | -24.0 | +1.2±0.5                                    | -1.0±0.1           |
| Sofular                        | Turkey       | Fleitmann et al., 2009                     | 31.9   | 41.4  | -4.7±0.2                                    | -1.0±0.2           |
| Fort Stanton <sup>*</sup>      | U.S.A.       | Asmerom et al., 2010                       | -105.3 | 33.3  | -2.0±1.0                                    | -1.0±0.2           |
| Cave of the bells <sup>*</sup> | U.S.A.       | Wagner et al., 2010                        | -110.8 | 31.8  | -2.4±0.2                                    | -1.0±0.2           |
| Moomi <sup>*</sup>             | Yemen        | Shakun et al., 2007                        | 54.0   | 12.5  | +2.2±0.6                                    | -0.9±0.2           |

114 <sup>\*</sup> early Holocene value used (i.e., shift likely larger than shown)

115 <sup>t</sup> values from 15.0 ka used

116 <sup>x</sup> Calcite-water fractionation correction subtracted from raw observed  $\Delta^{18}\text{O}_{\text{late-glacial}}$  to correct for  
117 the 4.0±0.8 °C colder climate (Annan and Hargreaves, 2013) at the last glacial stage (from  
118 O'Neil et al., 1969; modern temperatures from New et al., 2002;  $\Delta^{18}\text{O}_{\text{late-glacial}}$  values in  
119 preceding column are shown in raw (i.e, uncorrected) form.

120

121 **Table S5.** Ice core  $\delta^{18}\text{O}$  change from the late-glacial to the late-Holocene

| Ice core         | Country    | Reference               | Lon.   | Lat.  | $\Delta^{18}\text{O}_{\text{late-glacial}}$ |
|------------------|------------|-------------------------|--------|-------|---------------------------------------------|
| Sajama           | Bolivia    | Thompson et al., 1998   | -68.8  | -18.1 | -4.6 $\pm$ 1.0                              |
| Huascaran        | Peru       | Thompson et al., 1995   | -77.6  | -9.1  | -6.3 $\pm$ 1.3                              |
| Qinghai-Tibetan  | Tibet      | Thompson et al., 1997   | 81.5   | 35.3  | -0.6 $\pm$ 2.8                              |
| Devon Island     | Canada     | Patterson et al., 1977  | -82.3  | 75.3  | -4.7 $\pm$ 2.4                              |
| TALD Ice         | Antarctica | Buiron et al., 2011     | 159.2  | -72.8 | -4.0 $\pm$ 0.7                              |
| Byrd Glacier     | Antarctica | Blunier and Brook, 2001 | -119.5 | -80.0 | -5.9 $\pm$ 0.9                              |
| Dome Fuji        | Antarctica | Kawamura et al. 2007    | 39.7   | -77.3 | -3.6 $\pm$ 0.9                              |
| Dronning Maud    | Antarctica | EPICA Community, 2006   | 2.0    | -75.0 | -5.2 $\pm$ 1.0                              |
| Law Dome         | Antarctica | Pedro et al. 2011       | 112.8  | -66.8 | -6.7 $\pm$ 0.7                              |
| Siple Dome       | Antarctica | Pedro et al. 2011       | -148.8 | -81.7 | -7.1 $\pm$ 1.0                              |
| Renland ice core | Greenland  | Vinther et al., 2008    | -27.0  | 71.0  | -3.9 $\pm$ 1.0                              |
| NGRIP1           | Greenland  | Vinther et al., 2006    | -42.3  | 75.1  | -7.0 $\pm$ 1.9                              |

122

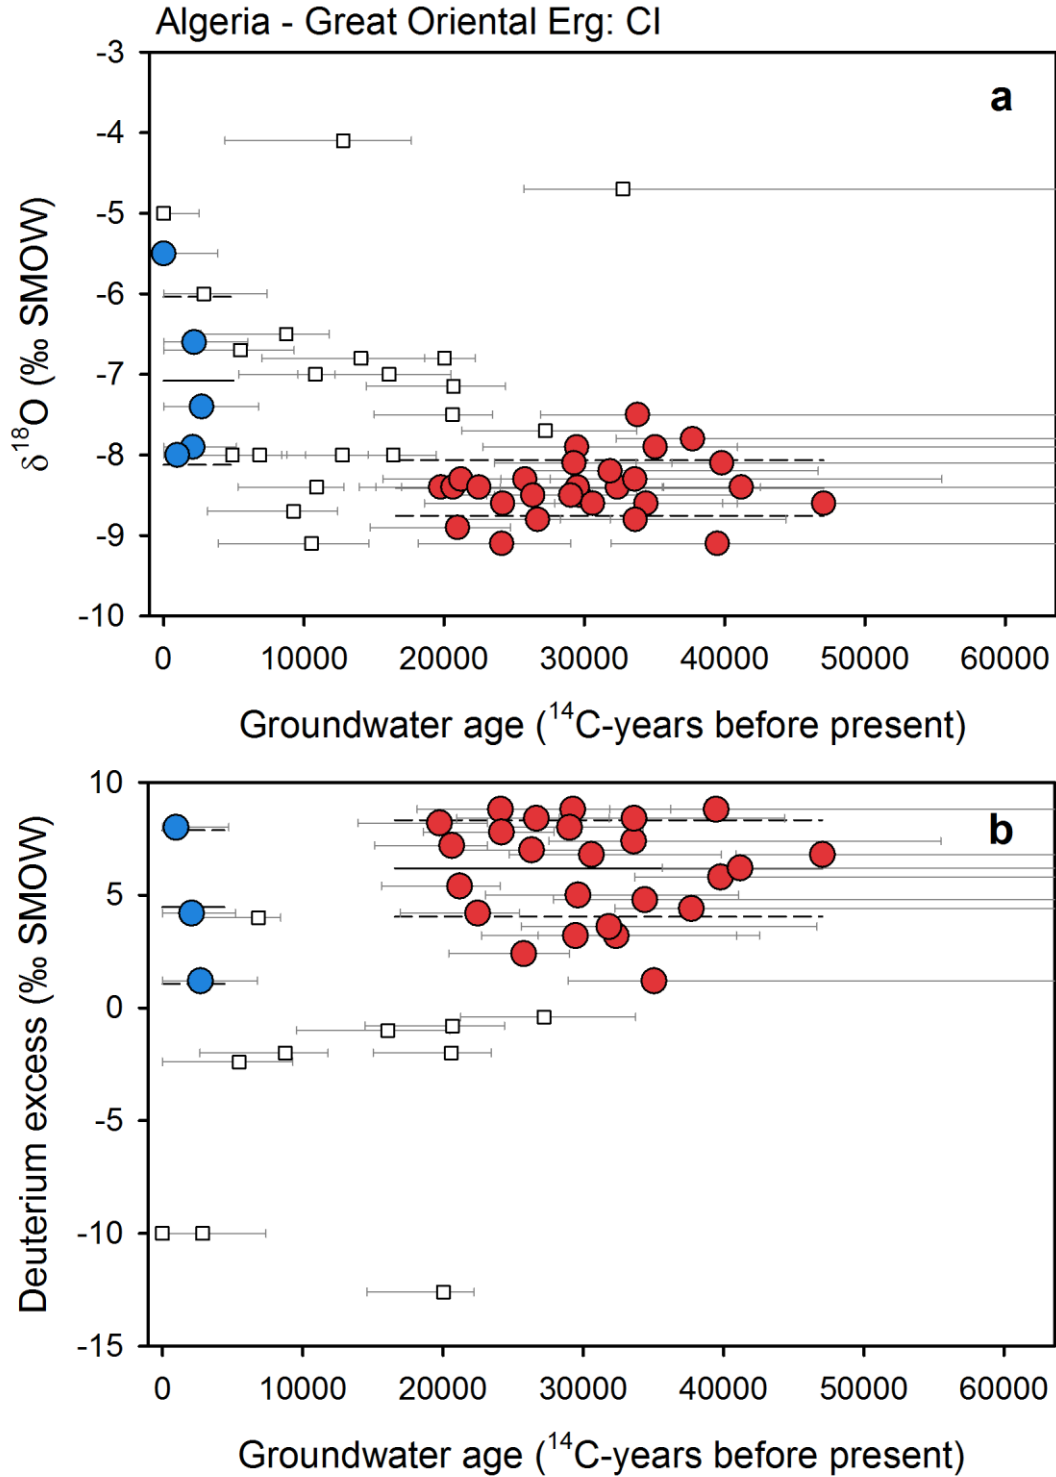

**Figure S1.** Groundwater isotope composition of the Great Oriental Erg (Continental Intercalaire) aquifer. Groundwater  $\delta^{18}\text{O}$  (a) and deuterium excess (b) plotted against corrected  $^{14}\text{C}$  ages for late-Holocene (blue circles) and late-glacial (red circles) groundwaters. Lines mark the average (solid line) and one standard deviation (dashed lines) for each age group (Edmunds et al., 2004).

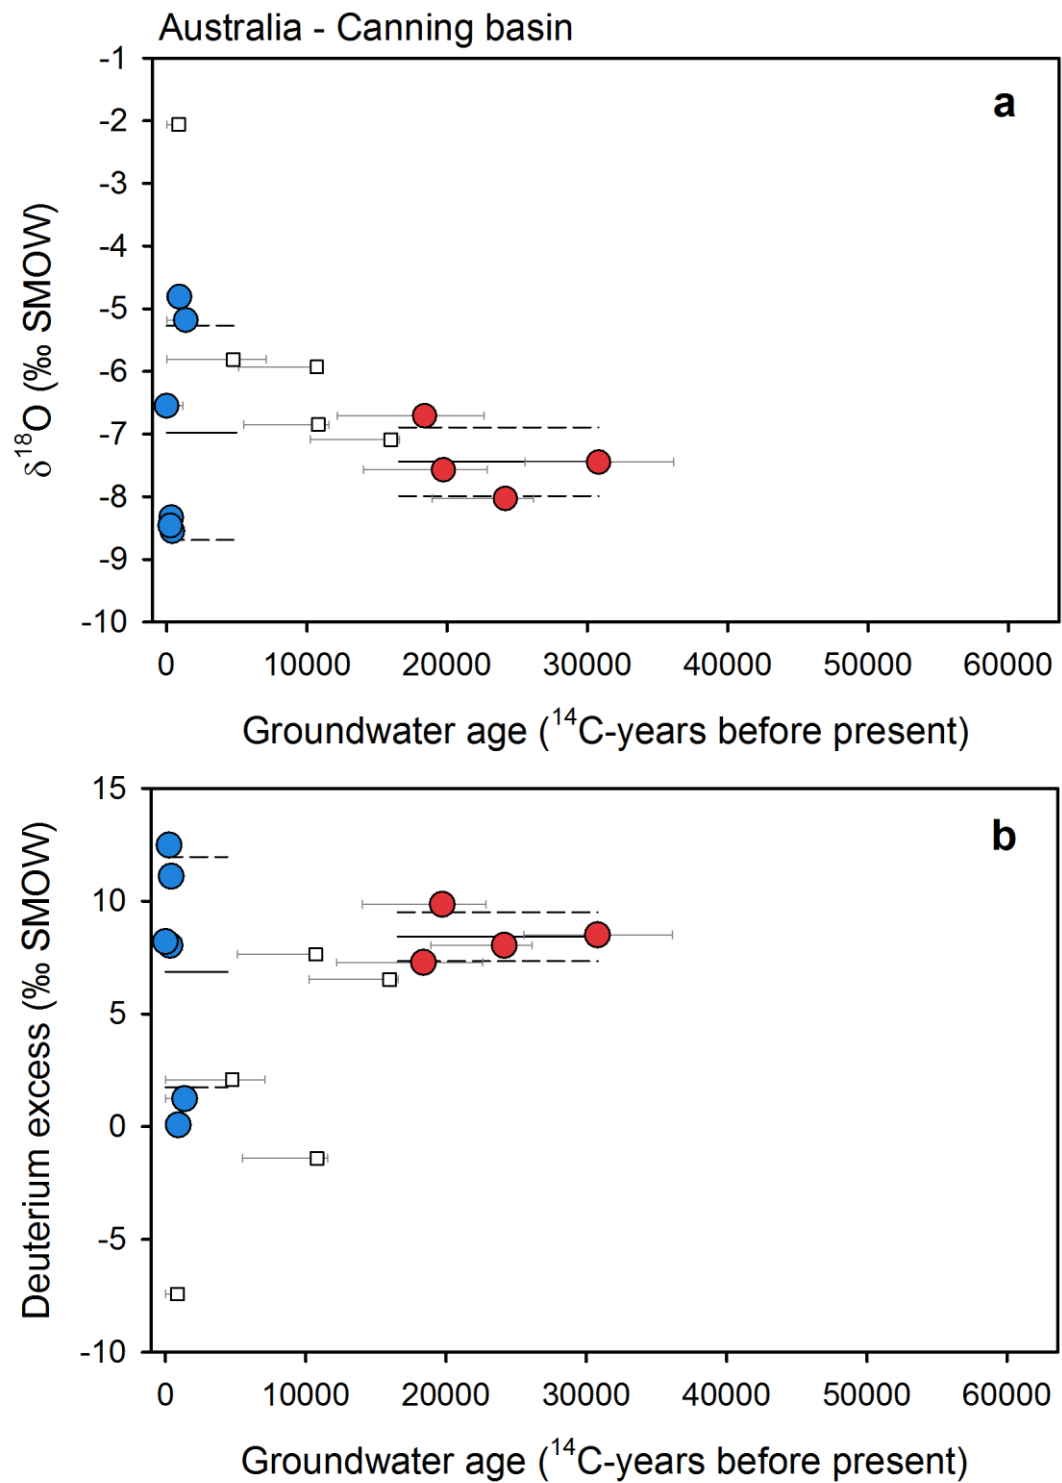

**Figure S2.** Groundwater isotope composition of the Canning basin. Groundwater  $\delta^{18}\text{O}$  (a) and deuterium excess (b) plotted against corrected  $^{14}\text{C}$  ages for late-Holocene (blue circles) and late-glacial (red circles) groundwaters. Lines mark the average (solid line) and one standard deviation (dashed lines) for each age group (Harrington et al., 2011).

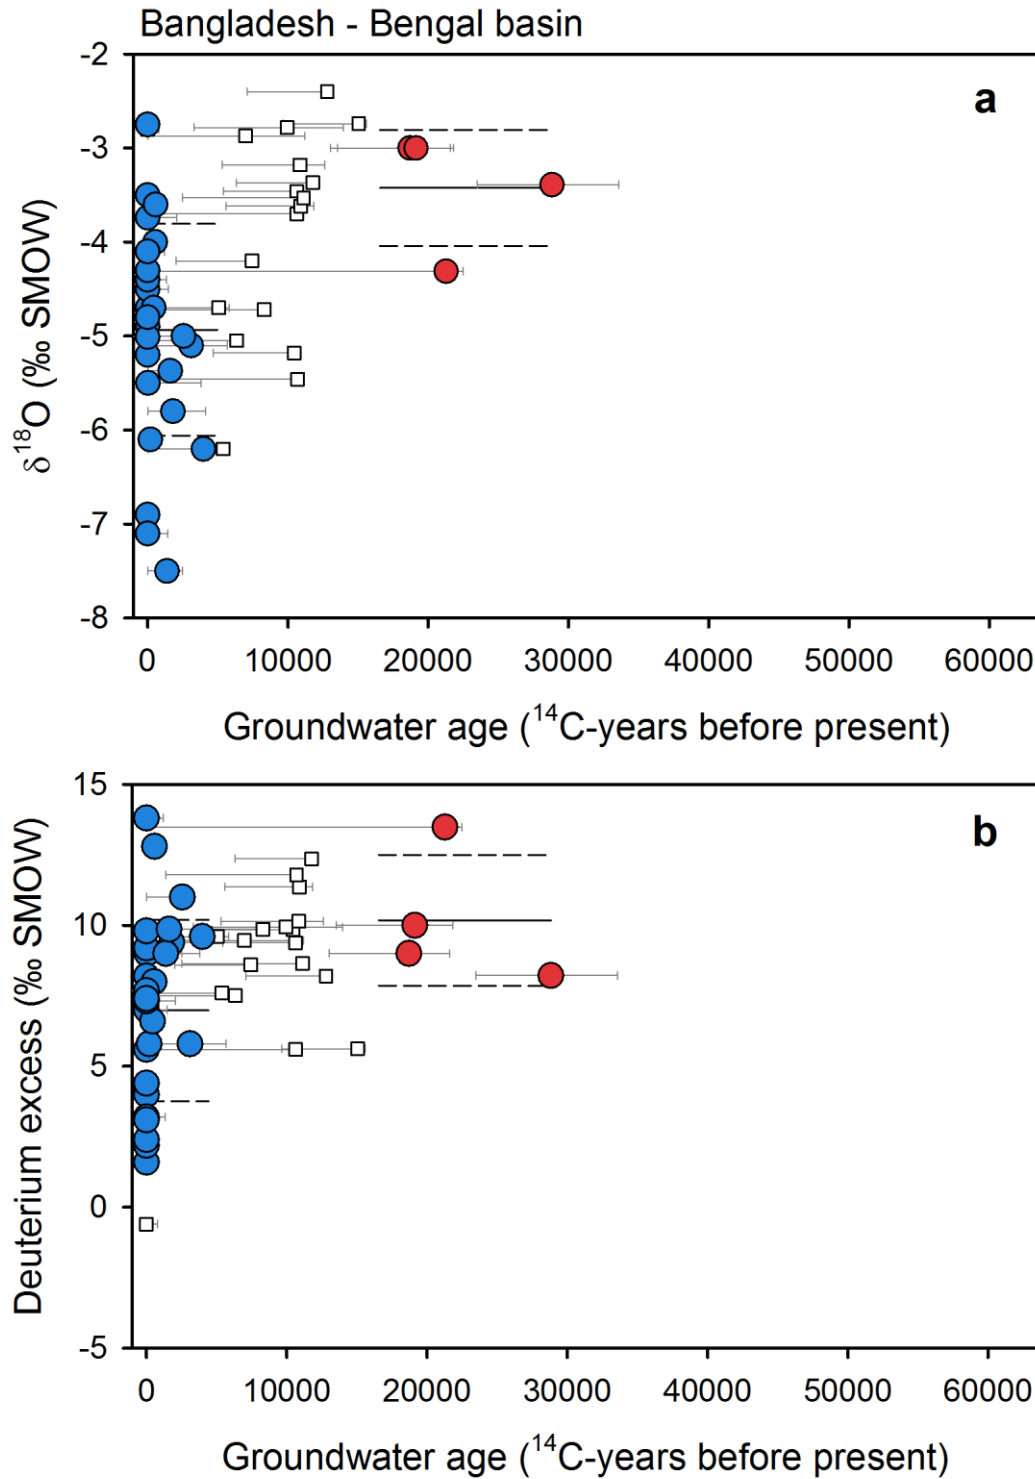

**Figure S3.** Groundwater isotope composition of the Bengal basin. Groundwater  $\delta^{18}\text{O}$  (a) and deuterium excess (b) against corrected  $^{14}\text{C}$  ages for late-Holocene (blue circles) and late-glacial (red circles) groundwaters. Lines mark average (solid line) and 1 s.d. (dashed lines) for each group (Aggarwal et al., 2000; Sikdar and Sahu, 2009; Majumder et al., 2011; Hoque and Burgess, 2012).

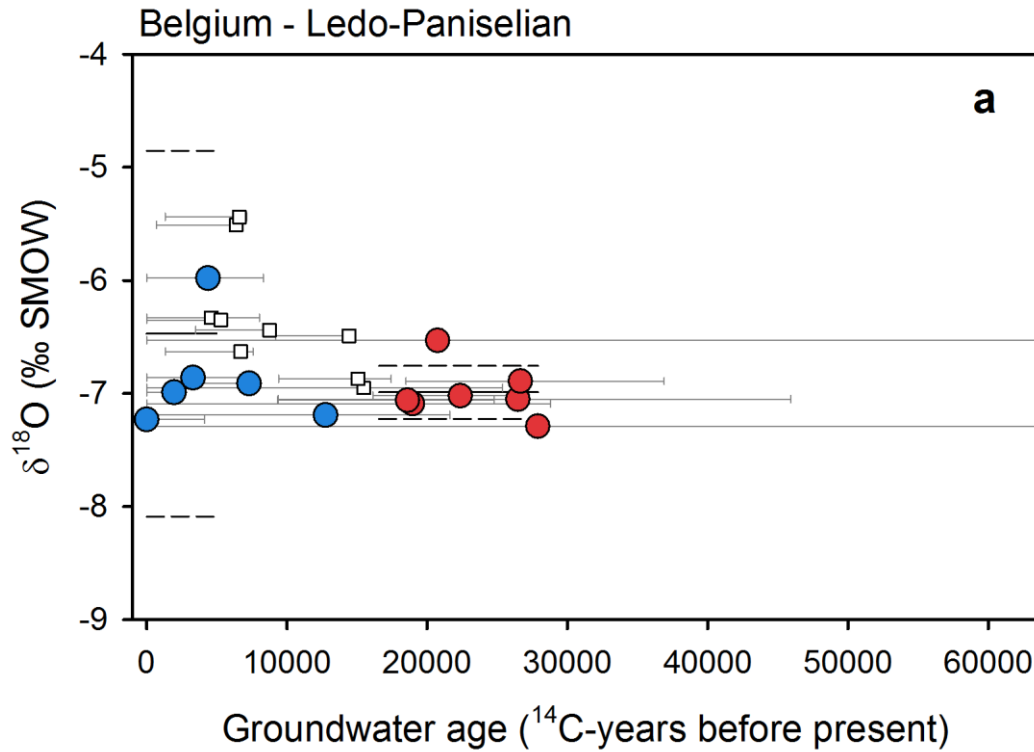

**Figure S4.** Groundwater isotope composition of the Ledo-Paniselian aquifer. Groundwater  $\delta^{18}\text{O}$  plotted against corrected  $^{14}\text{C}$  ages for late-Holocene (blue circles) and late-glacial (red circles) groundwaters. Lines mark the average (solid line) and one standard deviation (dashed lines) for each age group (Walraevens, 1990; Walraevens et al., 2001).

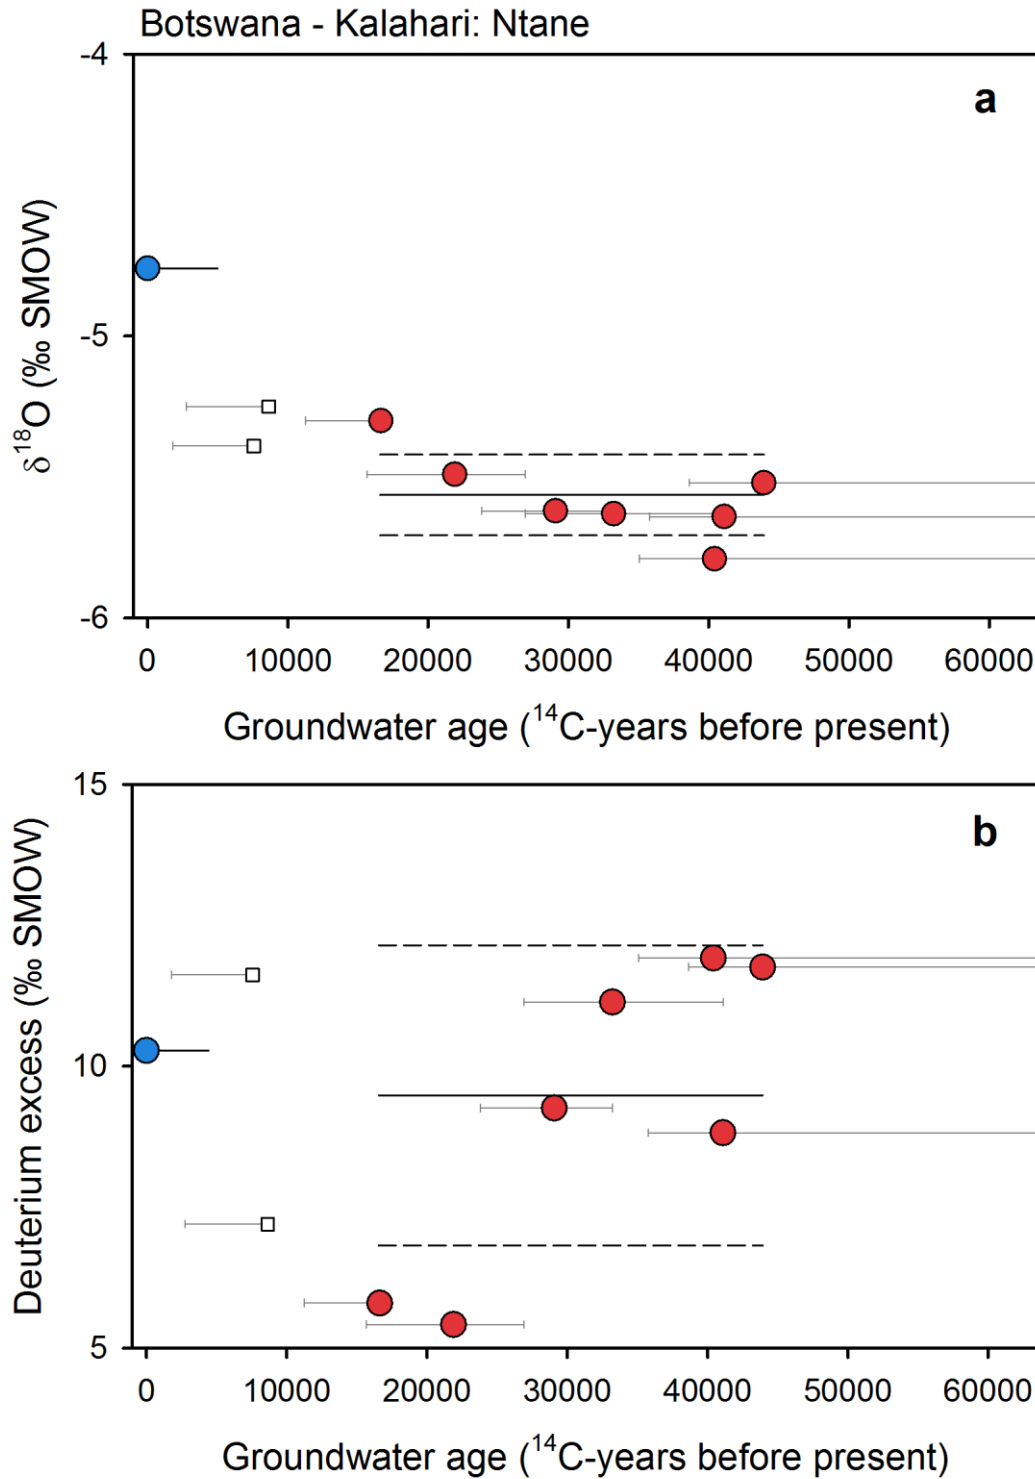

**Figure S5.** Groundwater isotope composition of the Ntane Sandstone aquifer. Groundwater  $\delta^{18}\text{O}$  (a) and deuterium excess (b) plotted against corrected  $^{14}\text{C}$  ages for late-Holocene (blue circles) and late-glacial (red circles) groundwaters. Lines mark the average (solid line) and one standard deviation (dashed lines) for each age group (Kulongoski et al., 2004).

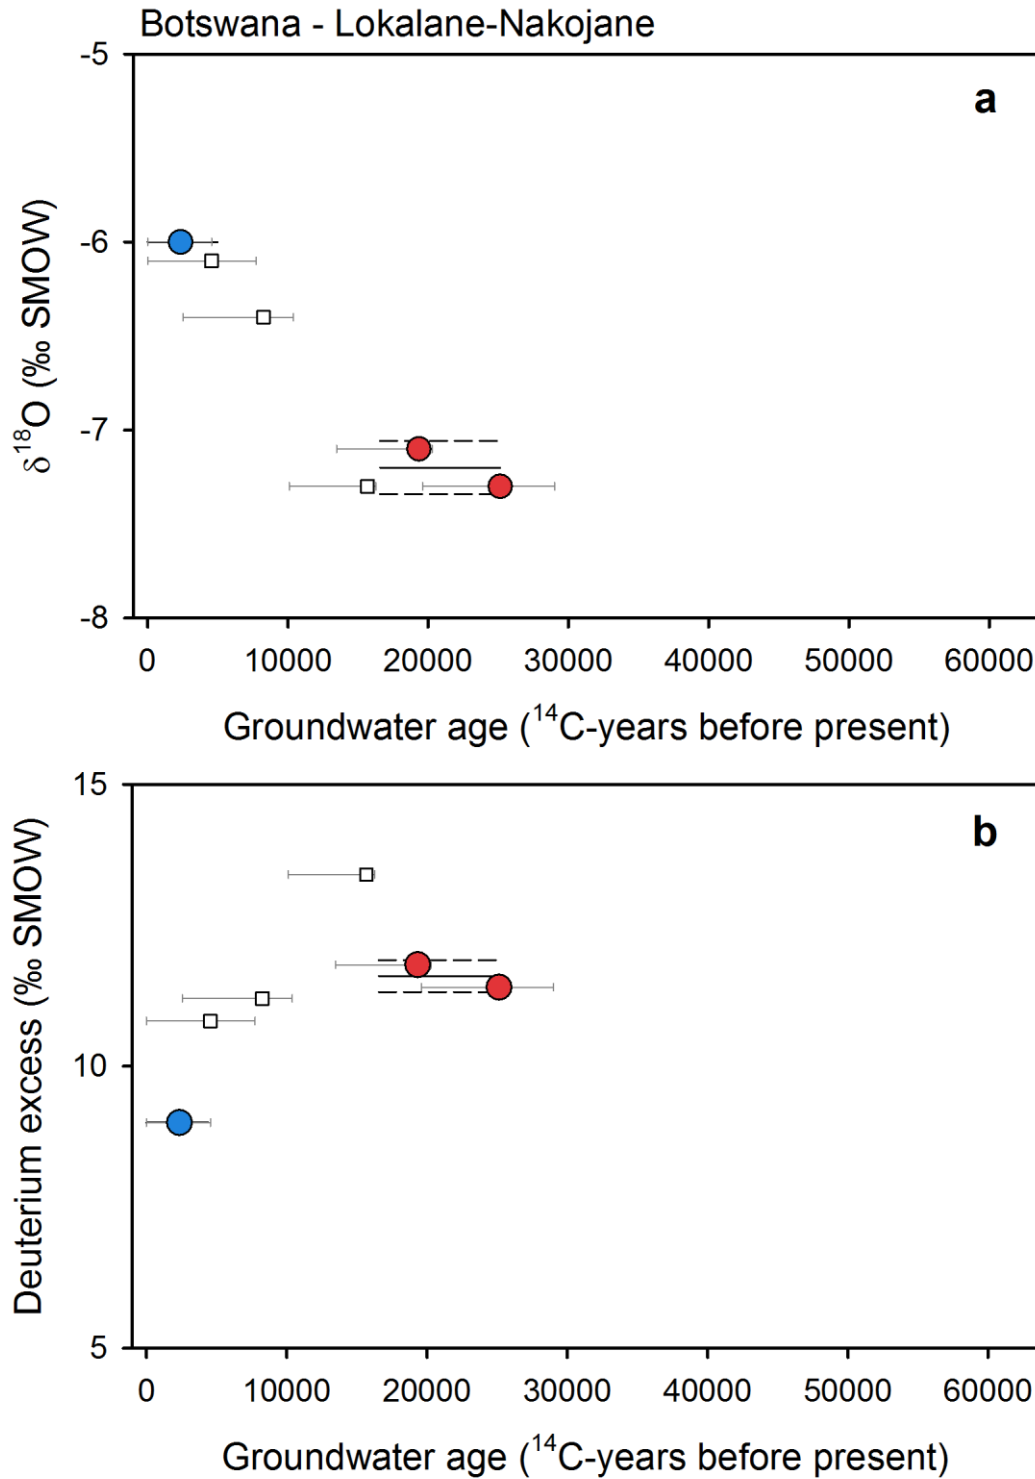

**Figure S6.** Groundwater isotope composition of the Lokelane-Nakojane aquifer. Groundwater  $\delta^{18}\text{O}$  (a) and deuterium excess (b) plotted against corrected  $^{14}\text{C}$  ages for late-Holocene (blue circles) and late-glacial (red circles) groundwaters. Lines mark the average (solid line) and one standard deviation (dashed lines) for each age group (Rahube, 2003).

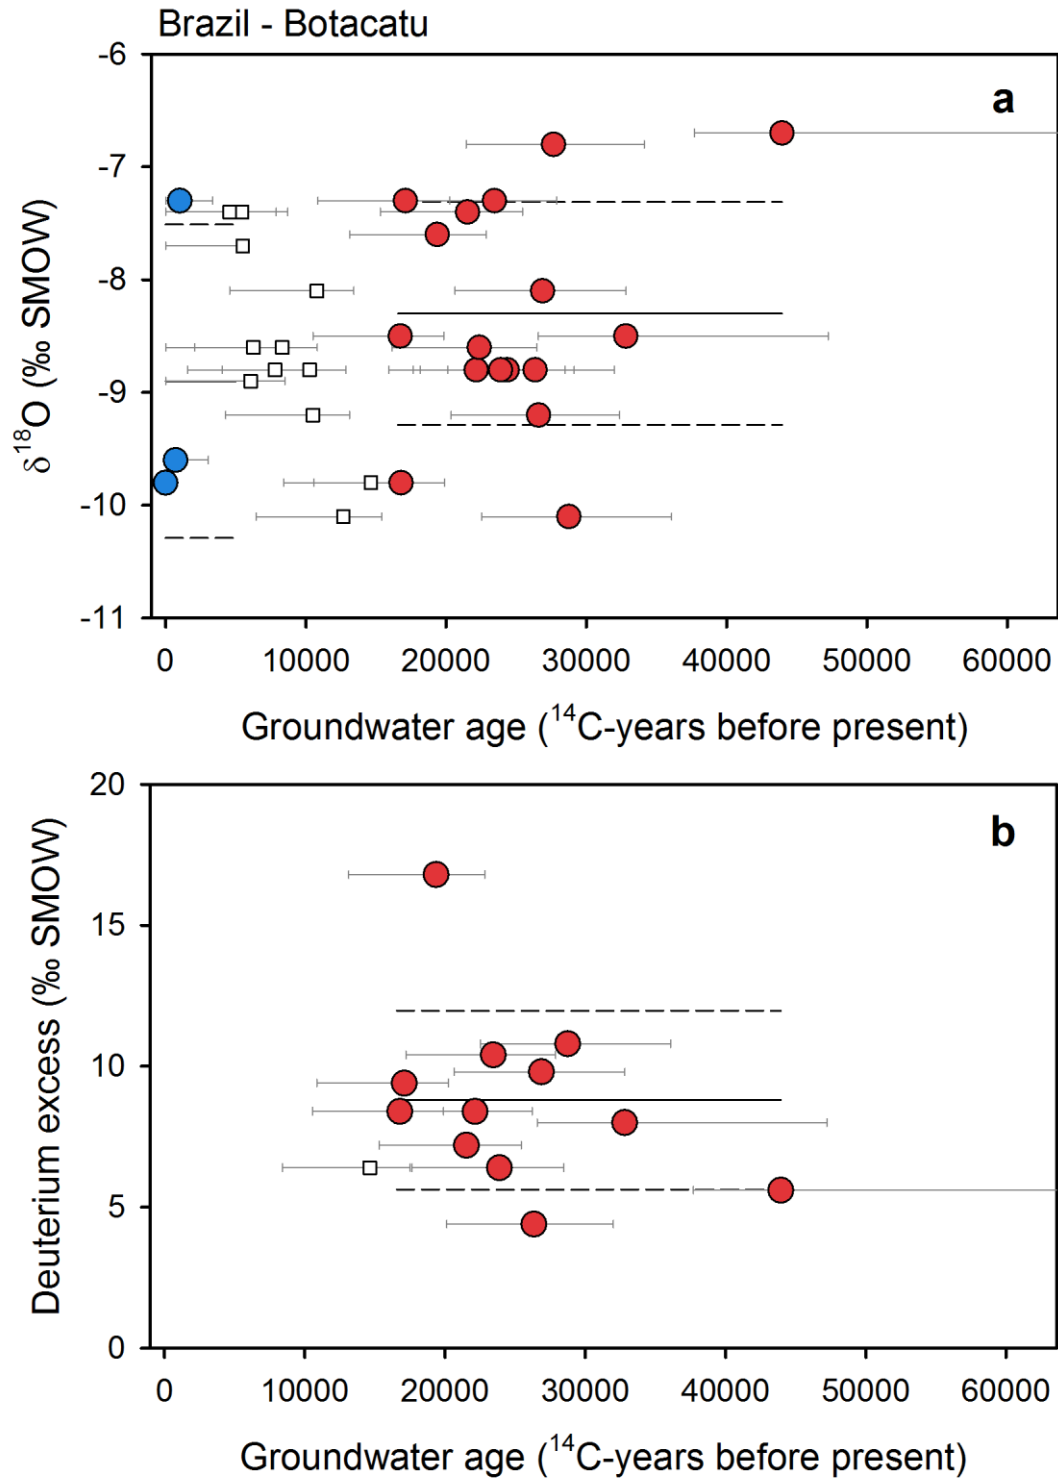

**Figure S7.** Groundwater isotope composition of the Botacatu aquifer system. Groundwater  $\delta^{18}\text{O}$  (a) and deuterium excess (b) plotted against corrected  $^{14}\text{C}$  ages for late-Holocene (blue circles) and late-glacial (red circles) groundwaters. Lines mark the average (solid line) and one standard deviation (dashed lines) for each age group (Gouvea da Silva, 1983).

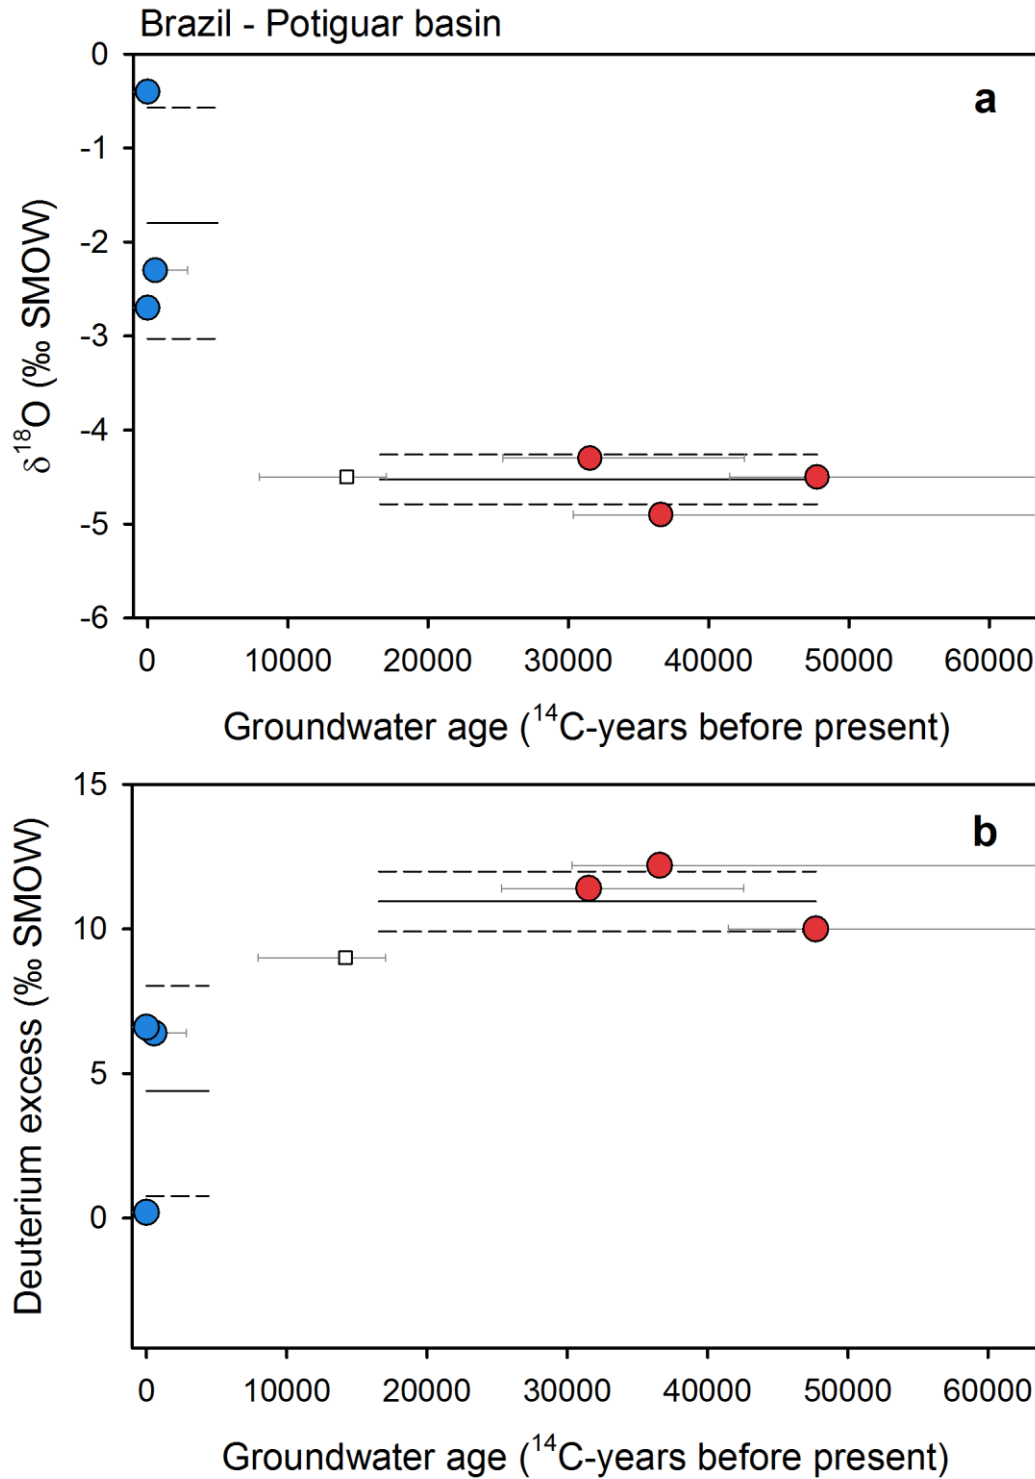

**Figure S8.** Groundwater isotope composition of the Potiguar basin. Groundwater  $\delta^{18}\text{O}$  (a) and deuterium excess (b) plotted against corrected  $^{14}\text{C}$  ages for late-Holocene (blue circles) and late-glacial (red circles) groundwaters. Lines mark the average (solid line) and one standard deviation (dashed lines) for each age group (Salati et al., 1974).

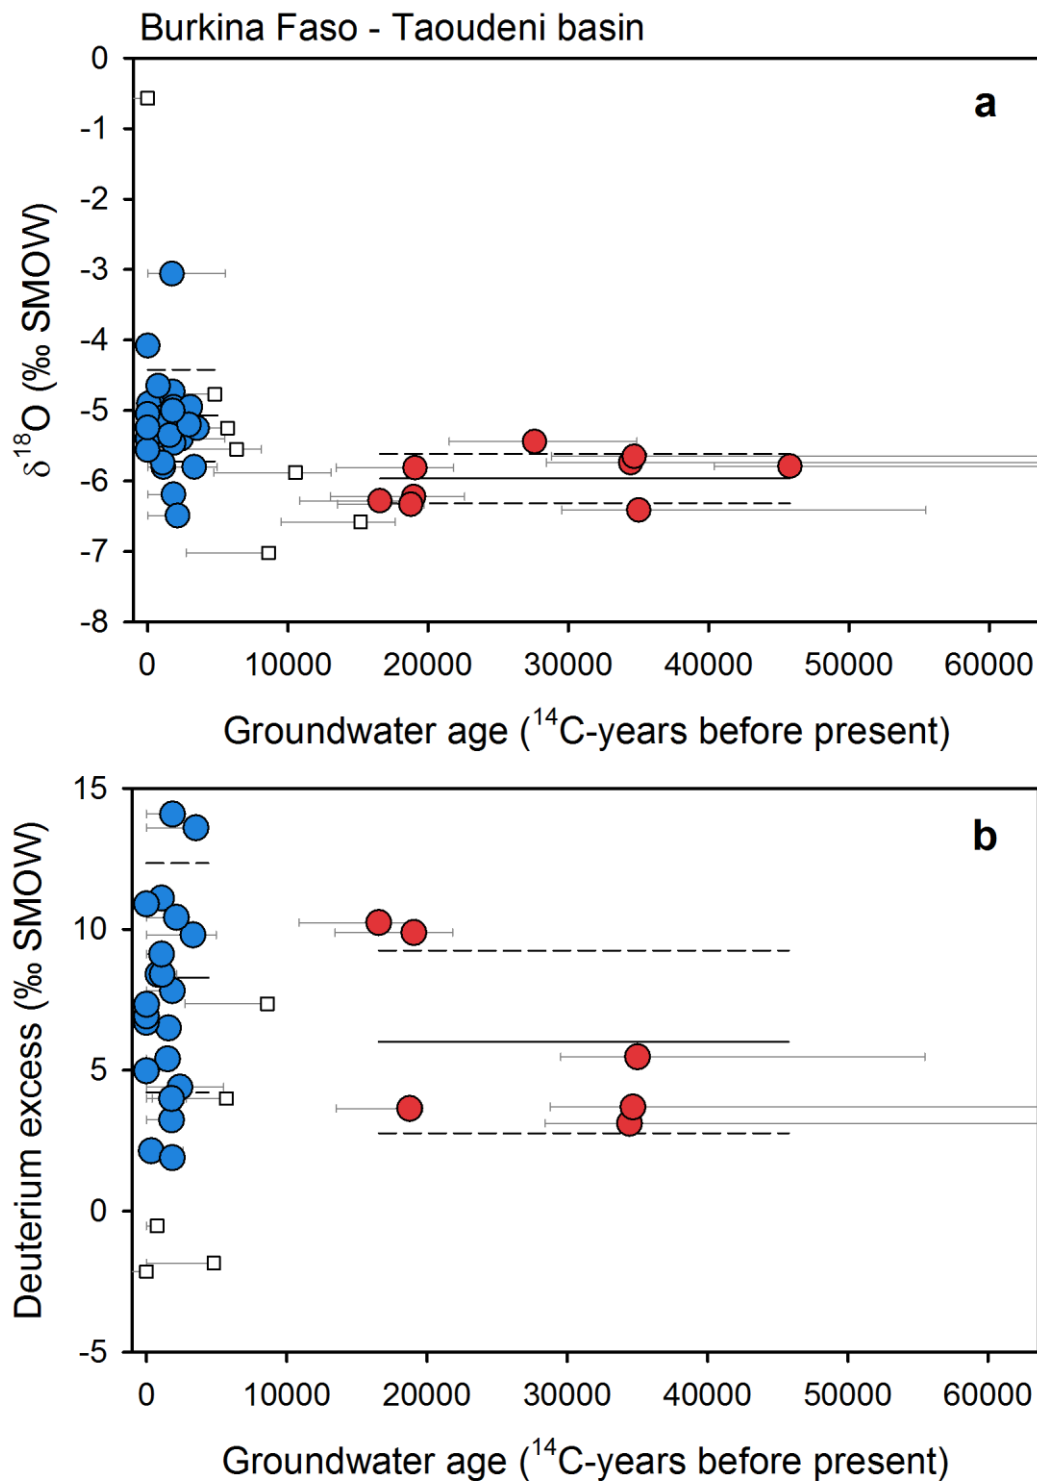

**Figure S9.** Groundwater isotope composition of the Taoudeni basin. Groundwater  $\delta^{18}\text{O}$  (a) and deuterium excess (b) plotted against corrected  $^{14}\text{C}$  ages for late-Holocene (blue circles) and late-glacial (red circles) groundwaters. Lines mark the average (solid line) and one standard deviation (dashed lines) for each age group (Huneau et al., 2011).

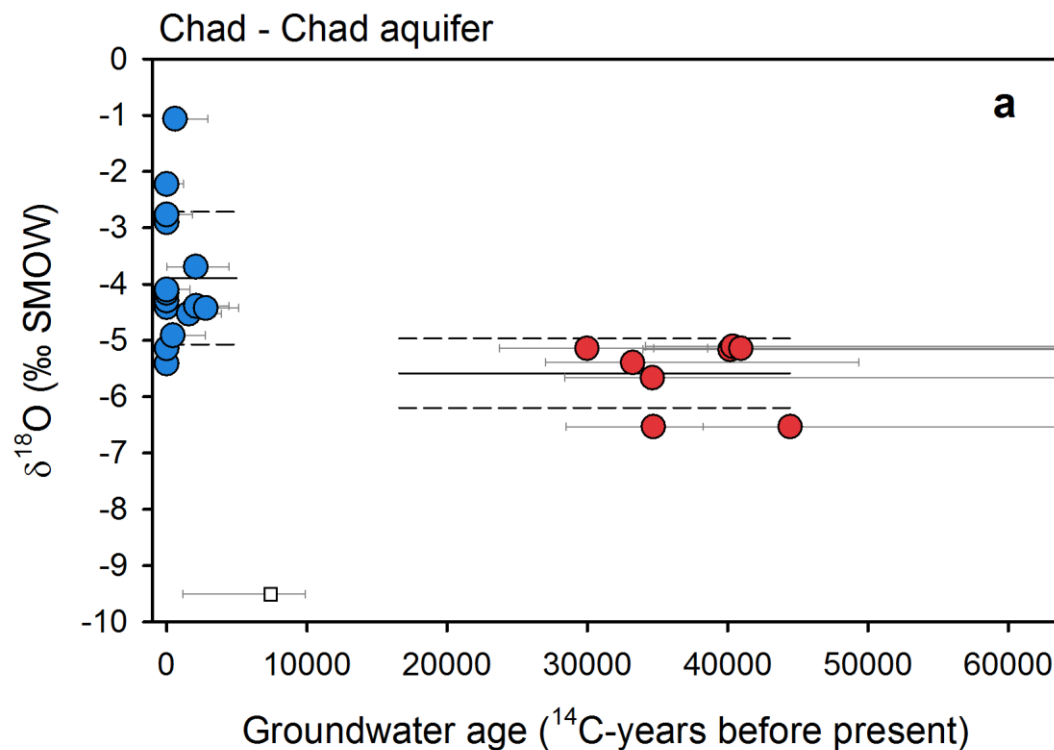

**Figure S10.** Groundwater isotope composition of the Chad aquifer (in Chad). Groundwater  $\delta^{18}\text{O}$  plotted against corrected  $^{14}\text{C}$  ages for late-Holocene (blue circles) and late-glacial (red circles) groundwaters. Lines mark the average (solid line) and one standard deviation (dashed lines) for each age group (Edmunds, 2009).

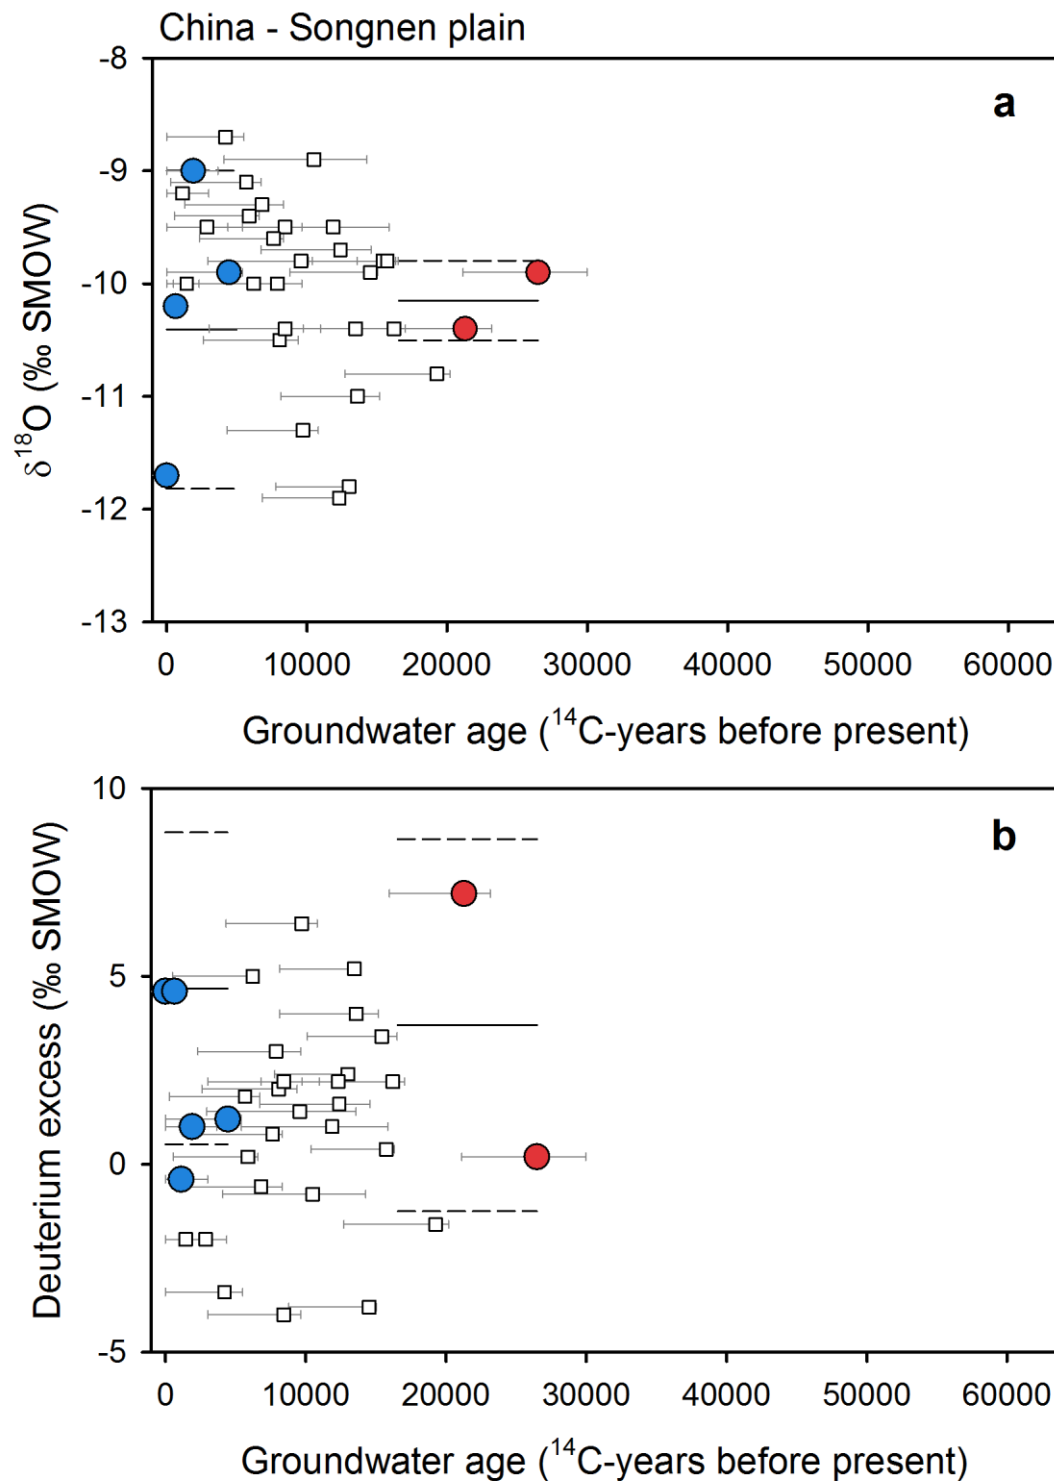

**Figure S11.** Groundwater isotope composition of the Songnen Plain. Groundwater  $\delta^{18}\text{O}$  (a) and deuterium excess (b) plotted against corrected  $^{14}\text{C}$  ages for late-Holocene (blue circles) and late-glacial (red circles) groundwaters. Lines mark the average (solid line) and one standard deviation (dashed lines) for each age group (Chen et al., 2011).

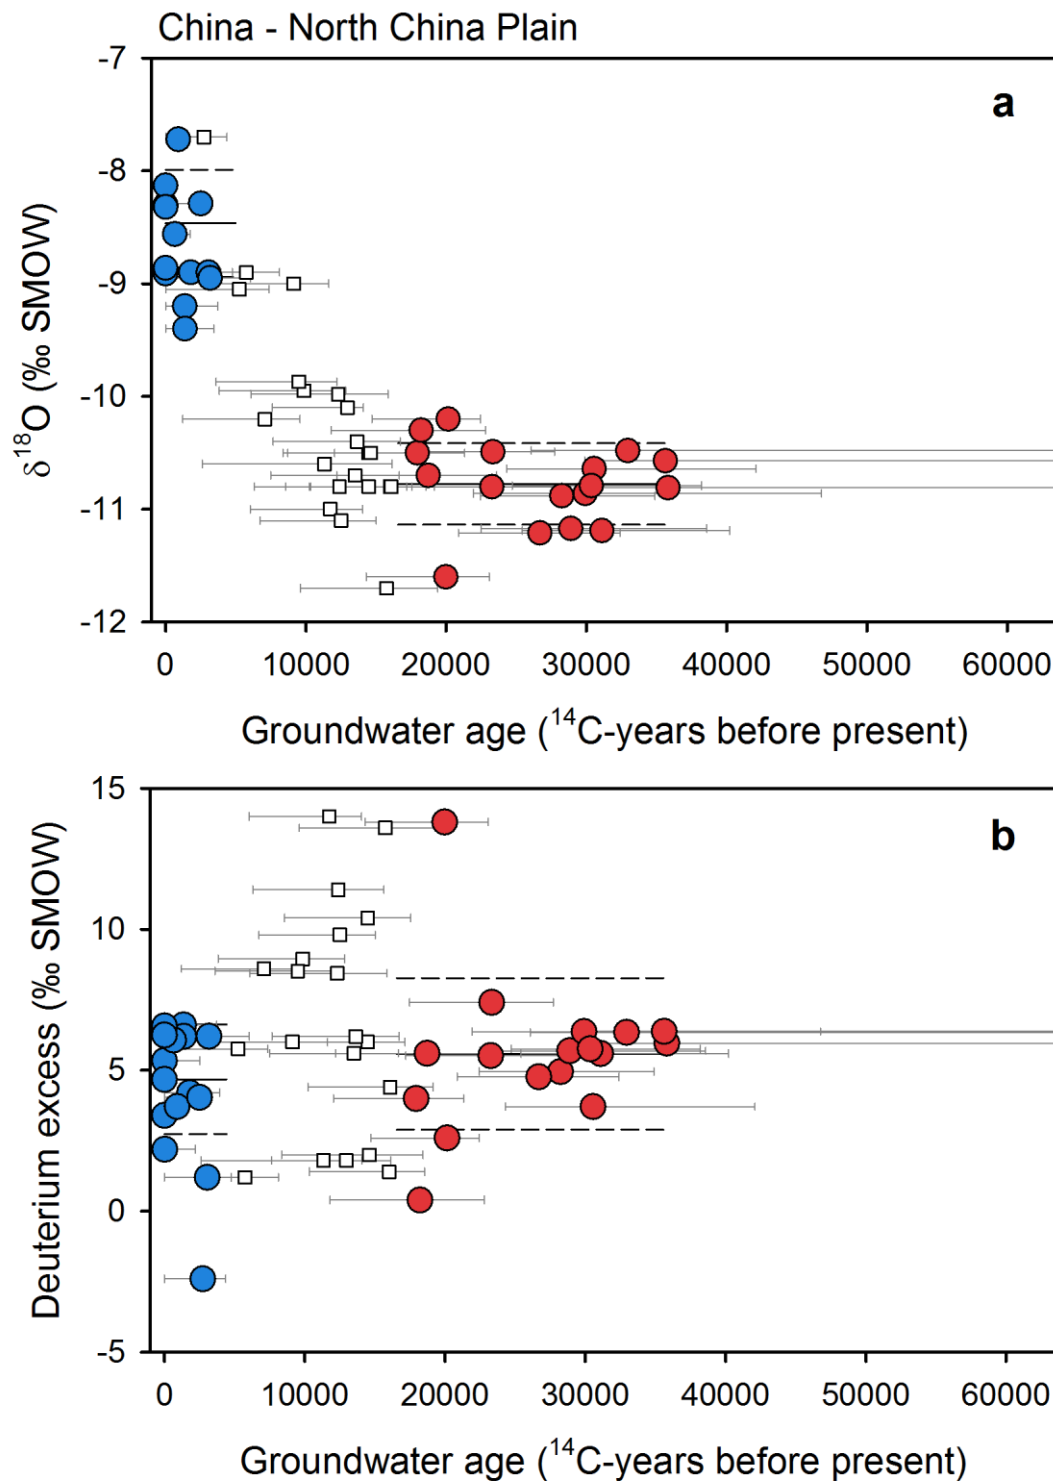

179  
 180 **Figure S12.** Groundwater isotope composition of the North China Plain. Groundwater  $\delta^{18}\text{O}$  (a)  
 181 and deuterium excess (b) plotted against corrected  $^{14}\text{C}$  ages for late-Holocene (blue circles) and  
 182 late-glacial (red circles) groundwaters. Lines mark the average (solid line) and one standard  
 183 deviation (dashed lines) for each age group (Zongyu et al., 2003; Kreuzer et al., 2009).

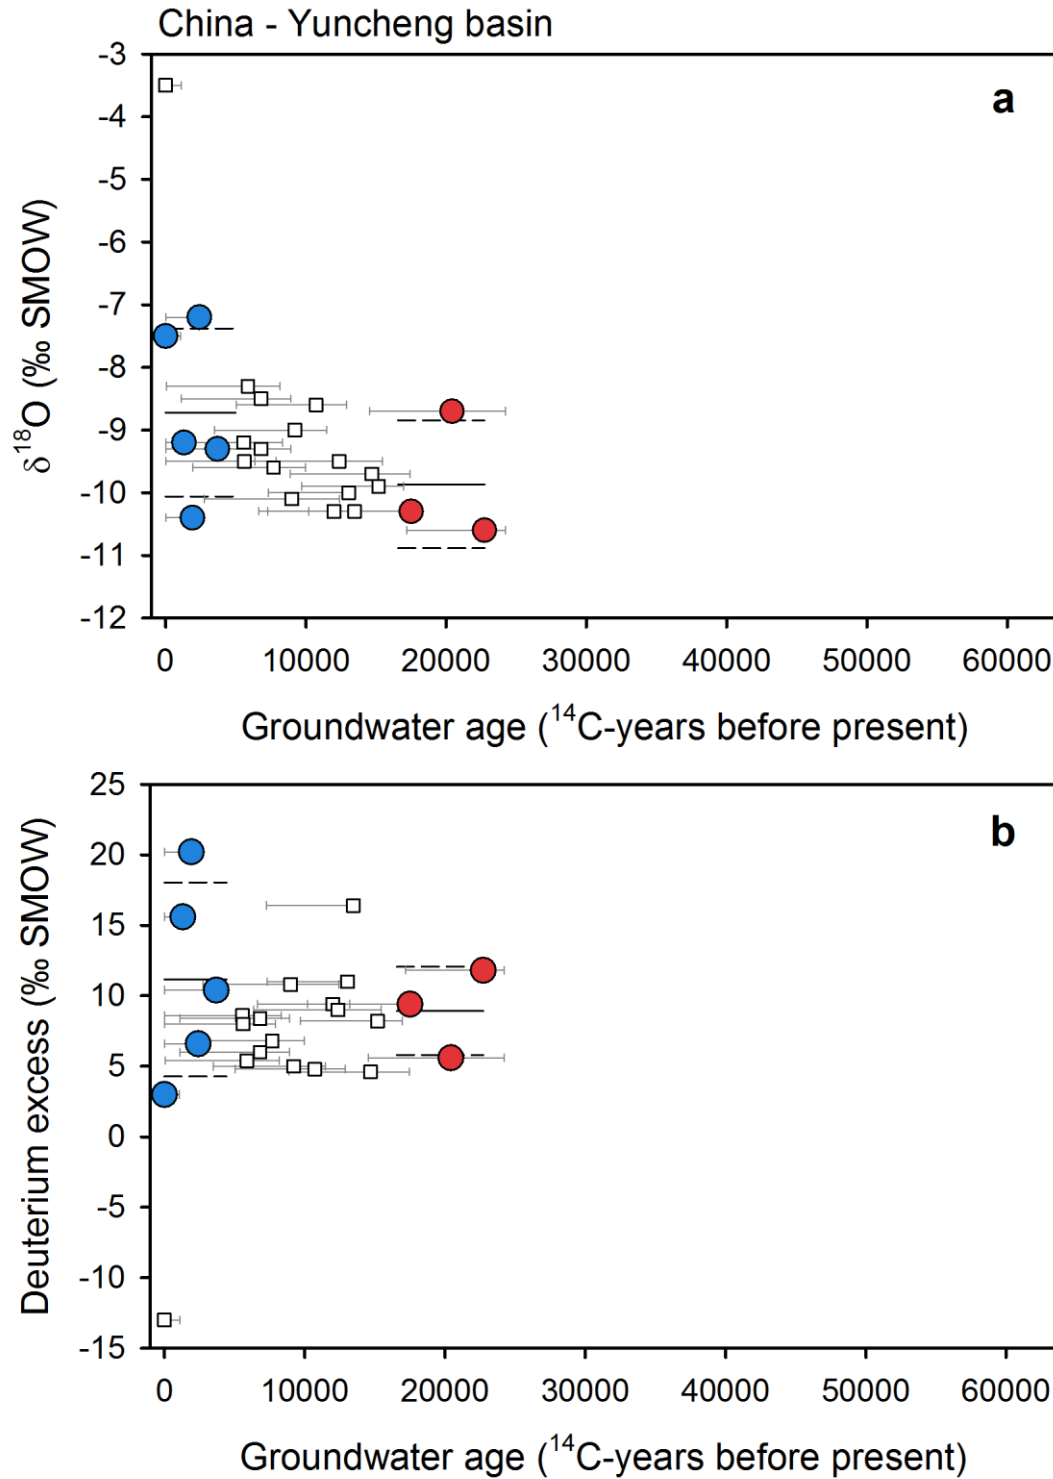

**Figure S13.** Groundwater isotope composition of the Yuncheng basin. Groundwater  $\delta^{18}\text{O}$  (a) and deuterium excess (b) plotted against corrected  $^{14}\text{C}$  ages for late-Holocene (blue circles) and late-glacial (red circles) groundwaters. Lines mark the average (solid line) and one standard deviation (dashed lines) for each age group (Currell et al., 2010).

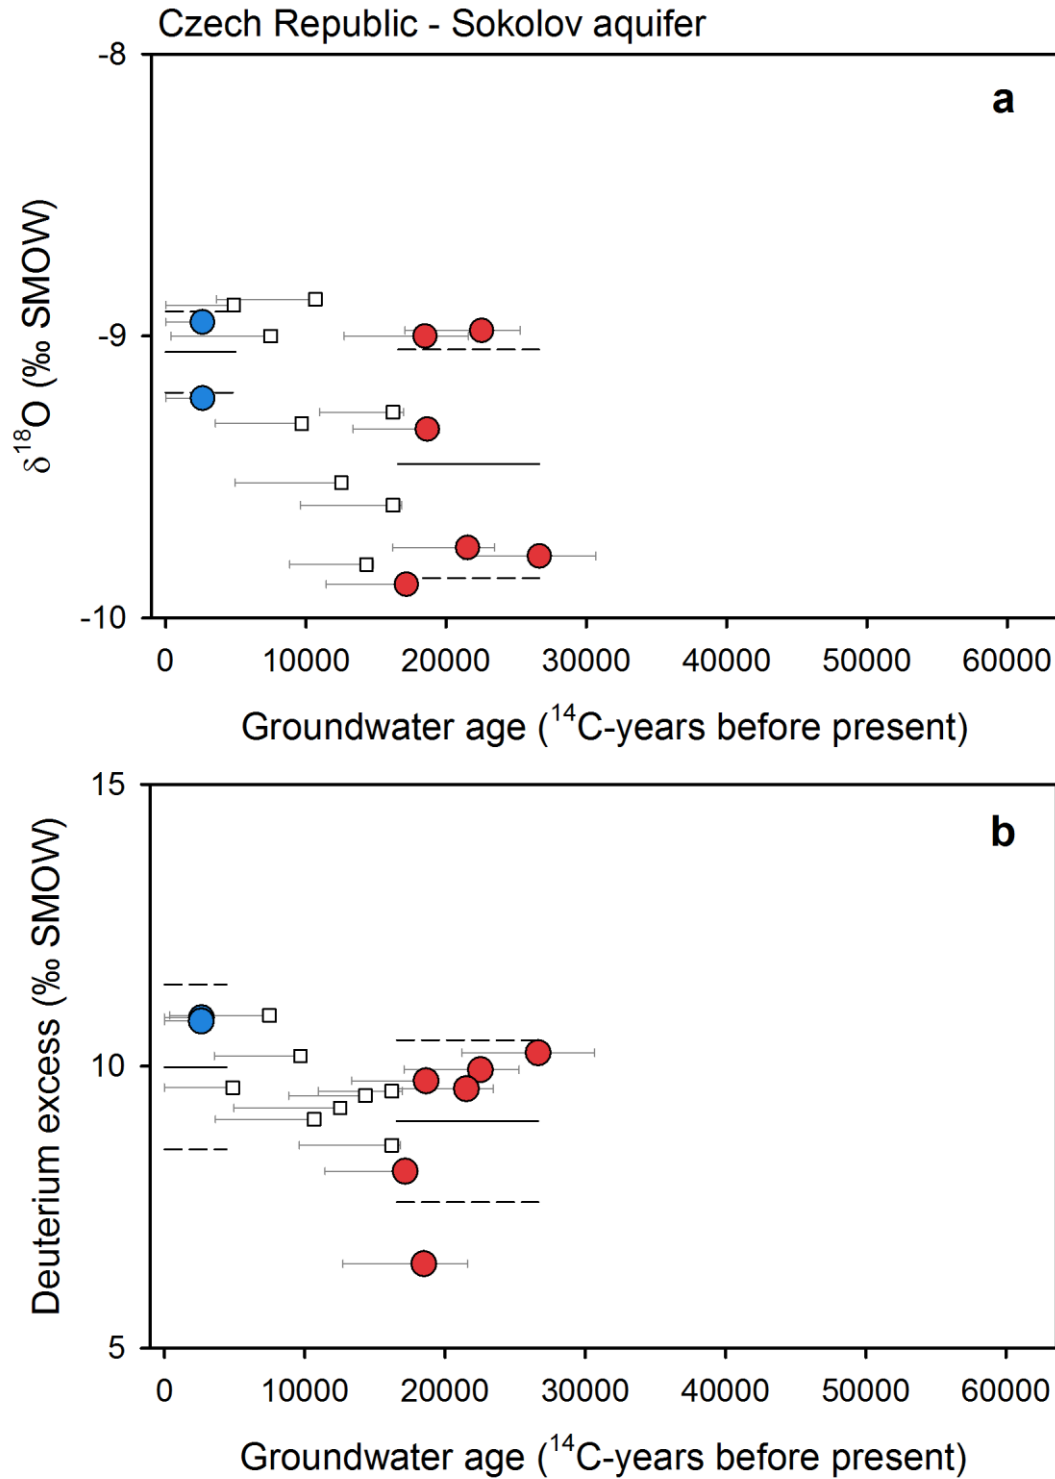

**Figure S14.** Groundwater isotope composition of the Sokolov aquifer. Groundwater  $\delta^{18}\text{O}$  (a) and deuterium excess (b) plotted against corrected  $^{14}\text{C}$  ages for late-Holocene (blue circles) and late-glacial (red circles) groundwaters. Lines mark the average (solid line) and one standard deviation (dashed lines) for each age group (Noseck et al., 2009).

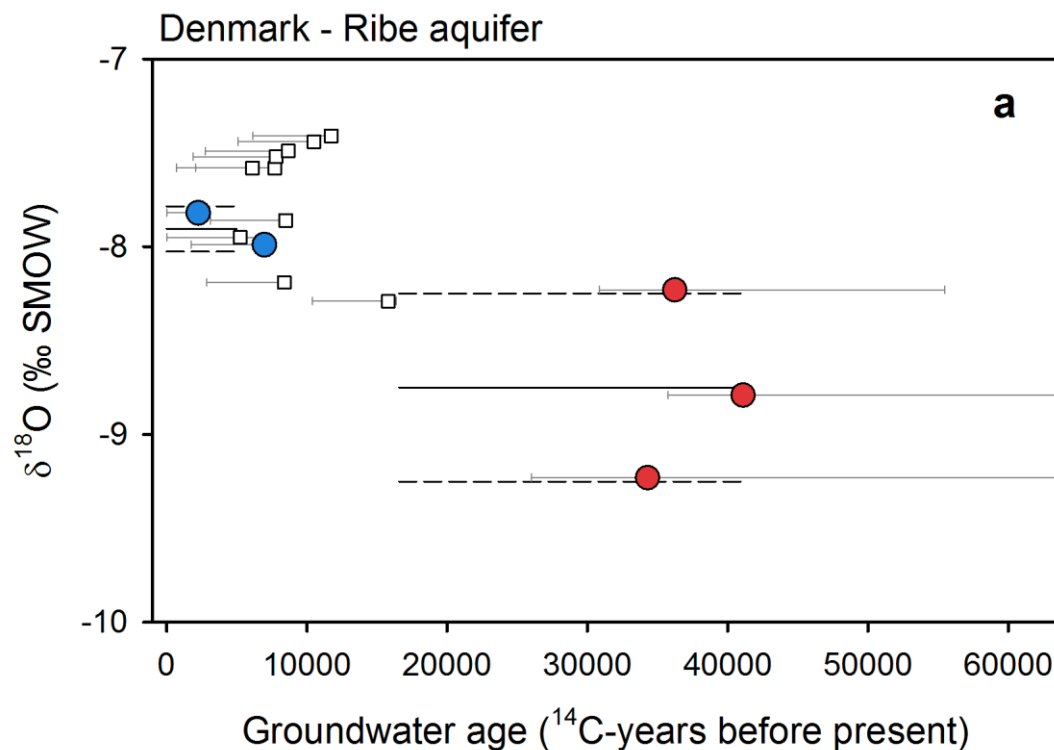

**Figure S15.** Groundwater isotope composition of the Ribe aquifer. Groundwater  $\delta^{18}\text{O}$  plotted against corrected  $^{14}\text{C}$  ages for late-Holocene (blue circles) and late-glacial (red circles) groundwaters. Lines mark the average (solid line) and one standard deviation (dashed lines) for each age group (Hinsby et al., 2001).

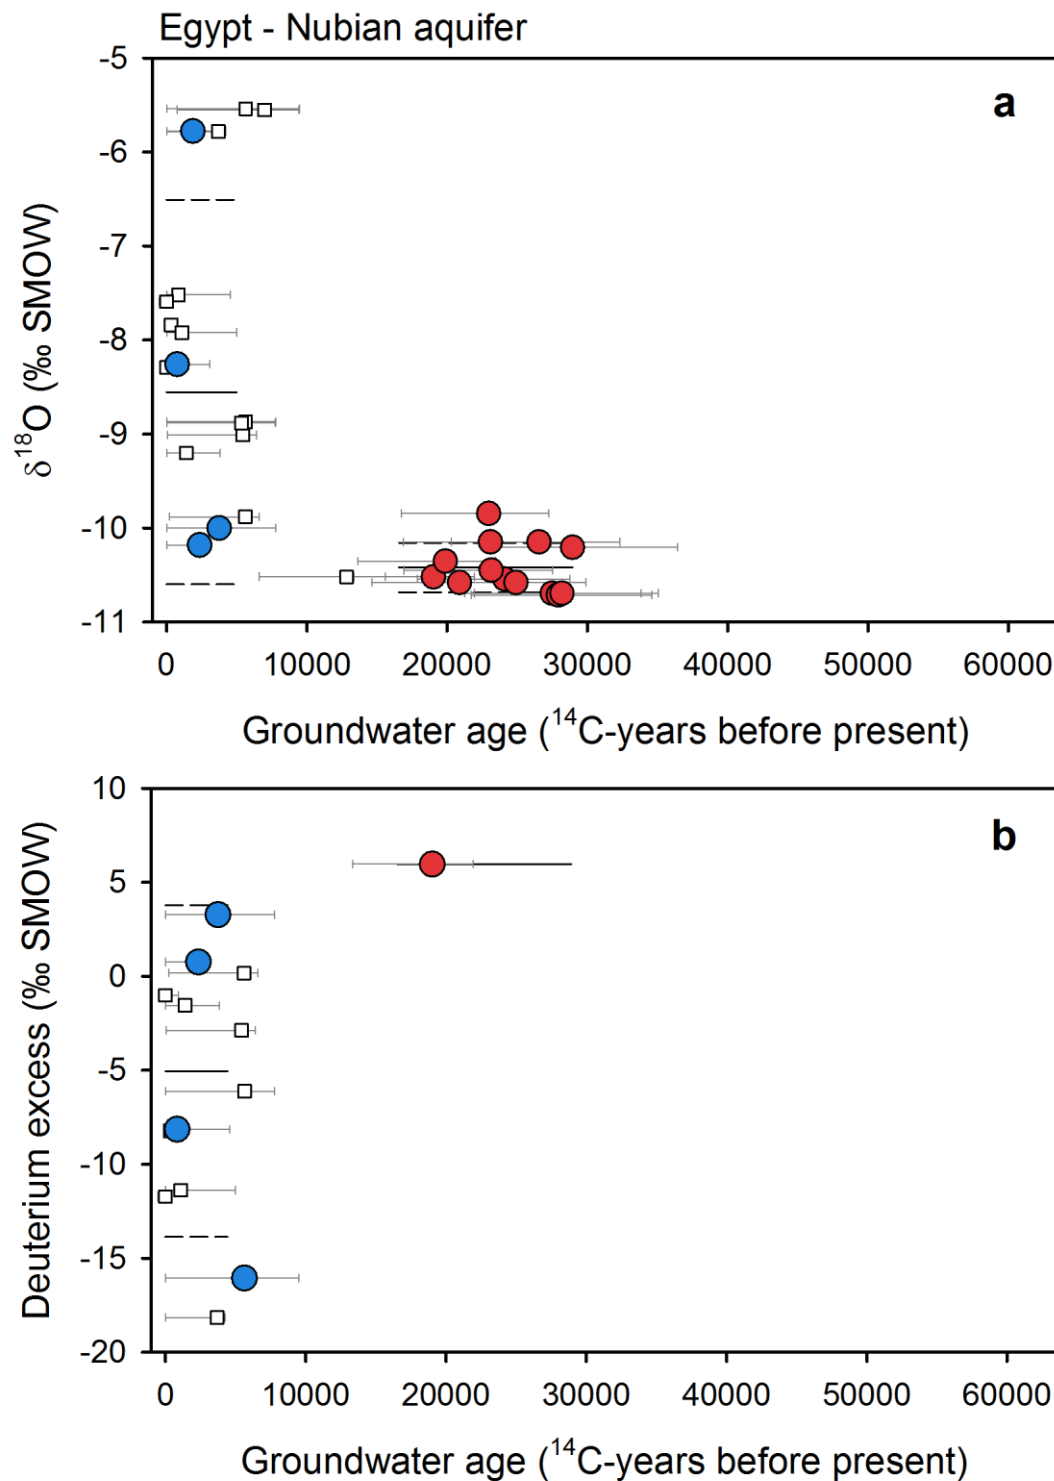

**Figure S16.** Groundwater isotope composition of the Nubian aquifer. Groundwater  $\delta^{18}\text{O}$  (a) and deuterium excess (b) plotted against corrected  $^{14}\text{C}$  ages for late-Holocene (blue circles) and late-glacial (red circles) groundwaters. Lines mark the average (solid line) and one standard deviation (dashed lines) for each age group (Shehata and Al-Ruwaih, 1999; Patterson et al., 2005; Edmunds, 2009).

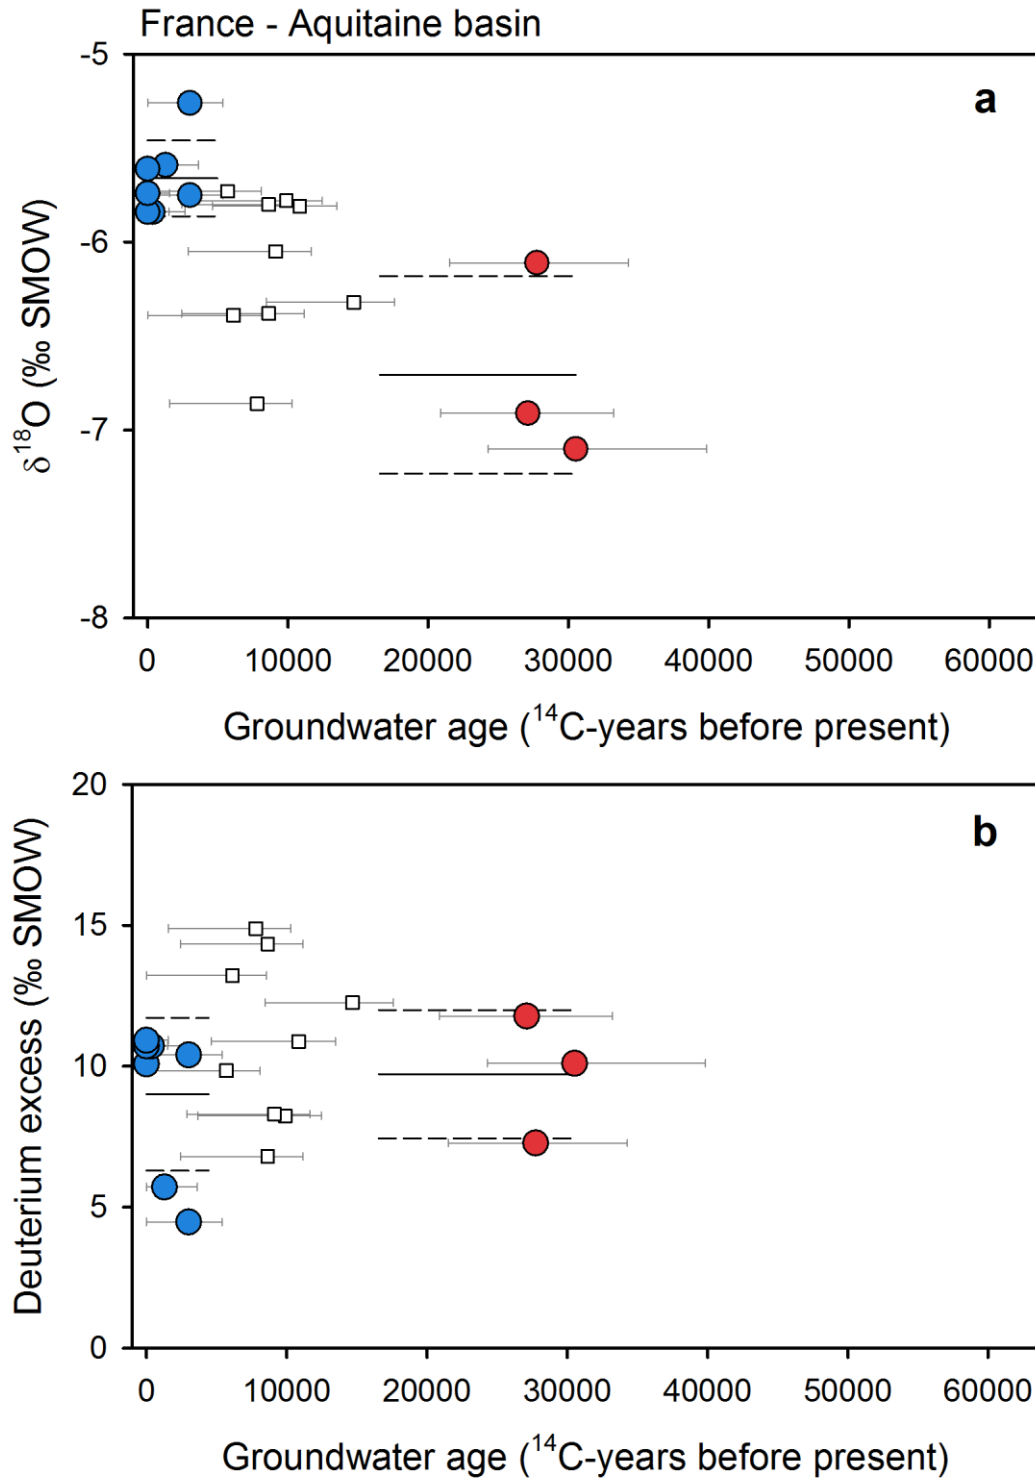

**Figure S17.** Groundwater isotope composition of the Aquitaine basin. Groundwater  $\delta^{18}\text{O}$  (a) and deuterium excess (b) plotted against corrected  $^{14}\text{C}$  ages for late-Holocene (blue circles) and late-glacial (red circles) groundwaters. Lines mark the average (solid line) and one standard deviation (dashed lines) for each age group (Le Gal La Salle et al., 1996).

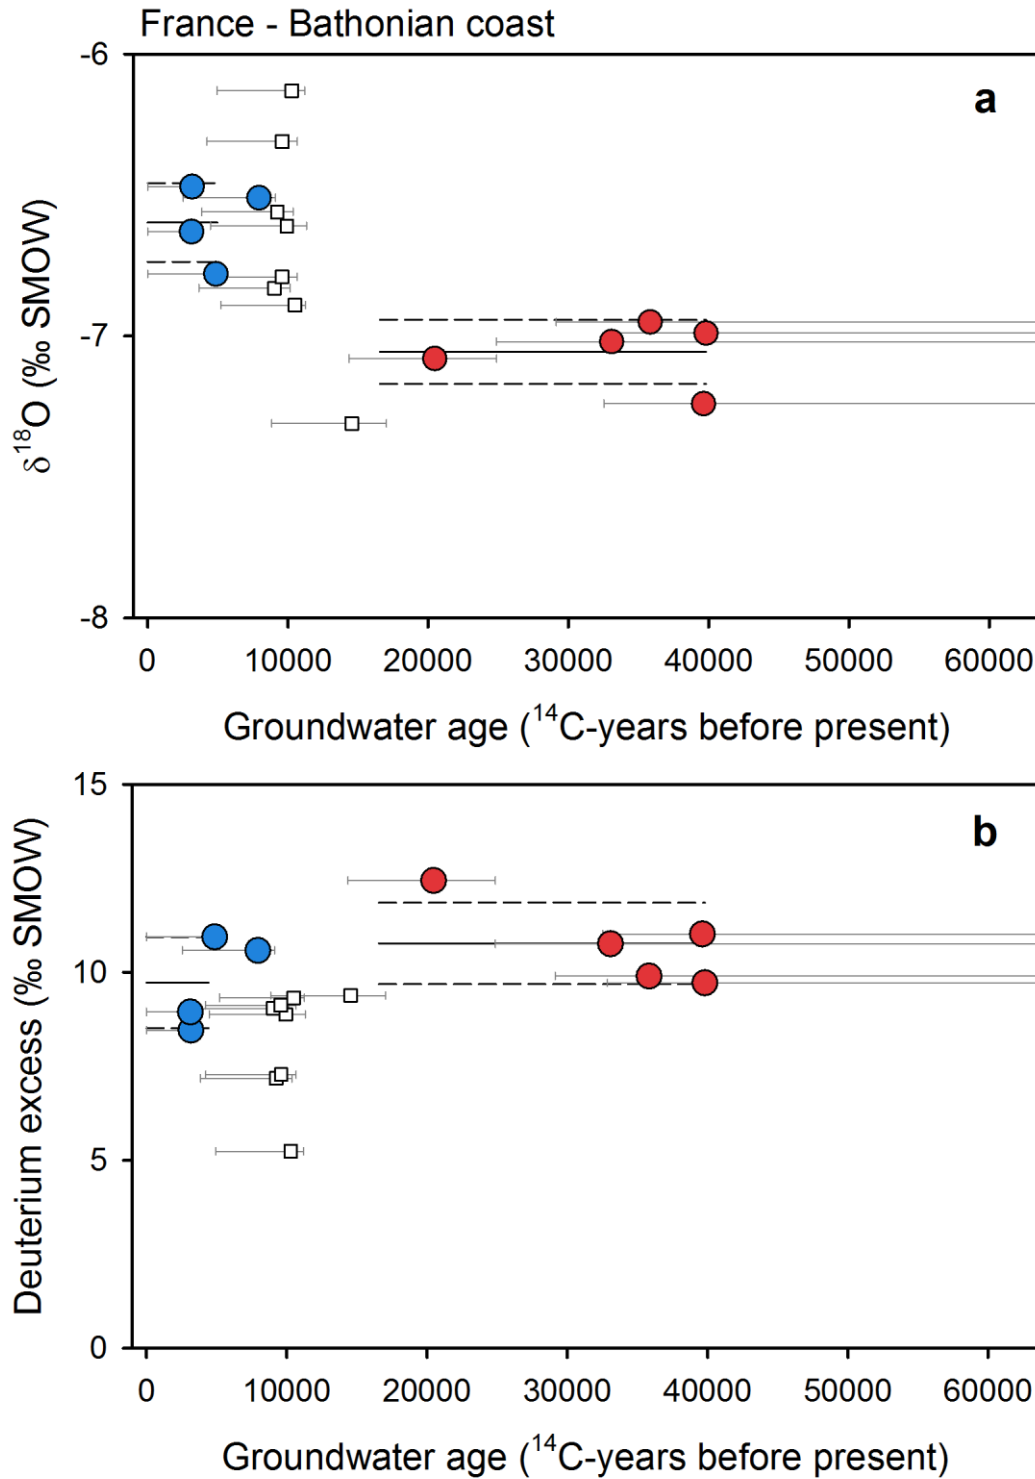

**Figure S18.** Groundwater isotope composition of the Bathonian coastal aquifer. Groundwater  $\delta^{18}\text{O}$  (a) and deuterium excess (b) plotted against corrected  $^{14}\text{C}$  ages for late-Holocene (blue circles) and late-glacial (red circles) groundwaters. Lines mark the average (solid line) and one standard deviation (dashed lines) for each age group (Barbecot et al., 2000).

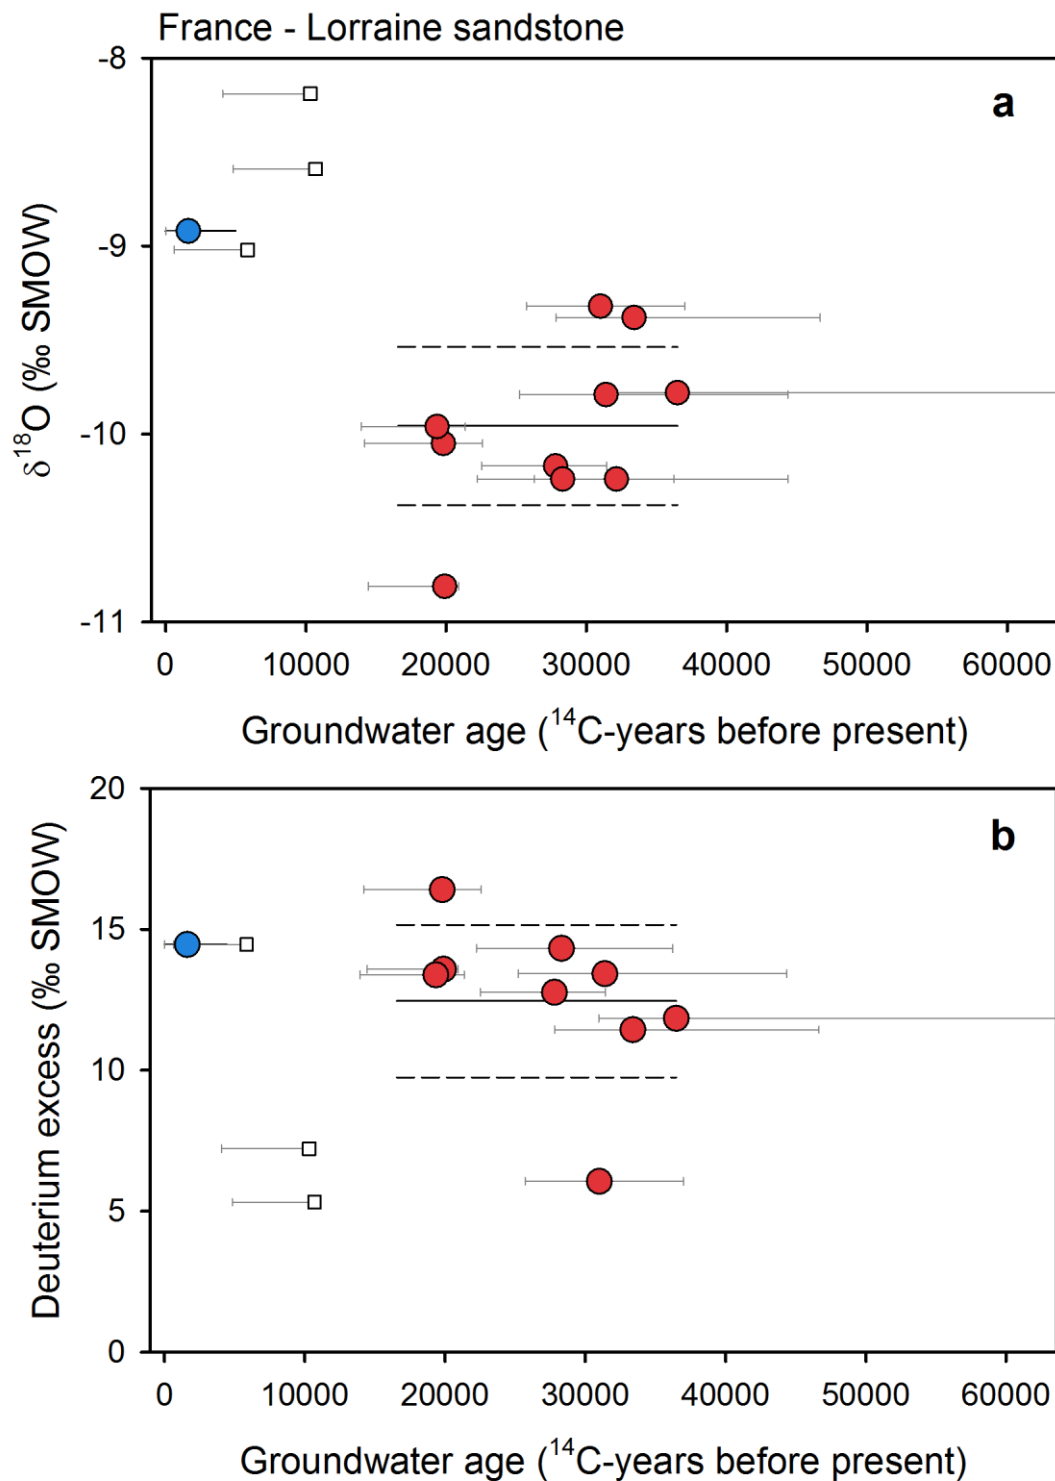

**Figure S19.** Groundwater isotope composition of the Lorraine sandstone aquifer. Groundwater  $\delta^{18}\text{O}$  (a) and deuterium excess (b) plotted against corrected  $^{14}\text{C}$  ages for late-Holocene (blue circles) and late-glacial (red circles) groundwaters. Lines mark the average (solid line) and one standard deviation (dashed lines) for each age group (Celle-Jeanton et al., 2009).

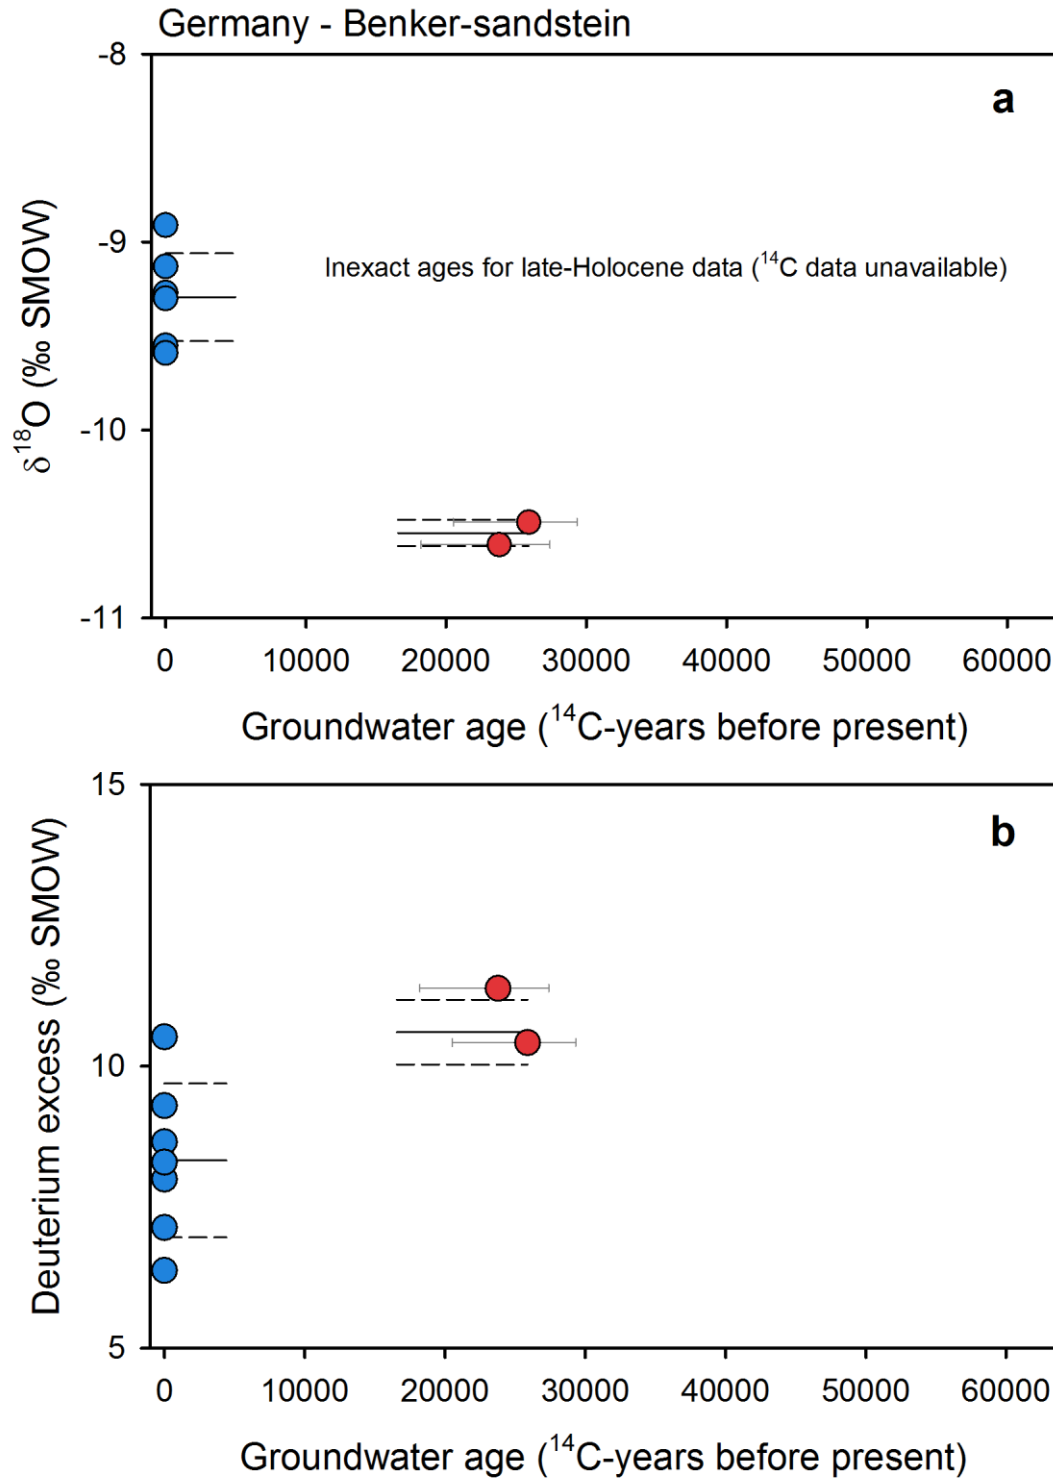

**Figure S20.** Groundwater isotope composition of the Benker-sandstein aquifer. Groundwater  $\delta^{18}\text{O}$  (a) and deuterium excess (b) plotted against corrected  $^{14}\text{C}$  ages for late-Holocene (blue circles) and late-glacial (red circles) groundwaters. Lines mark the average (solid line) and one standard deviation (dashed lines) for each age group (van Geldern et al., 2014).

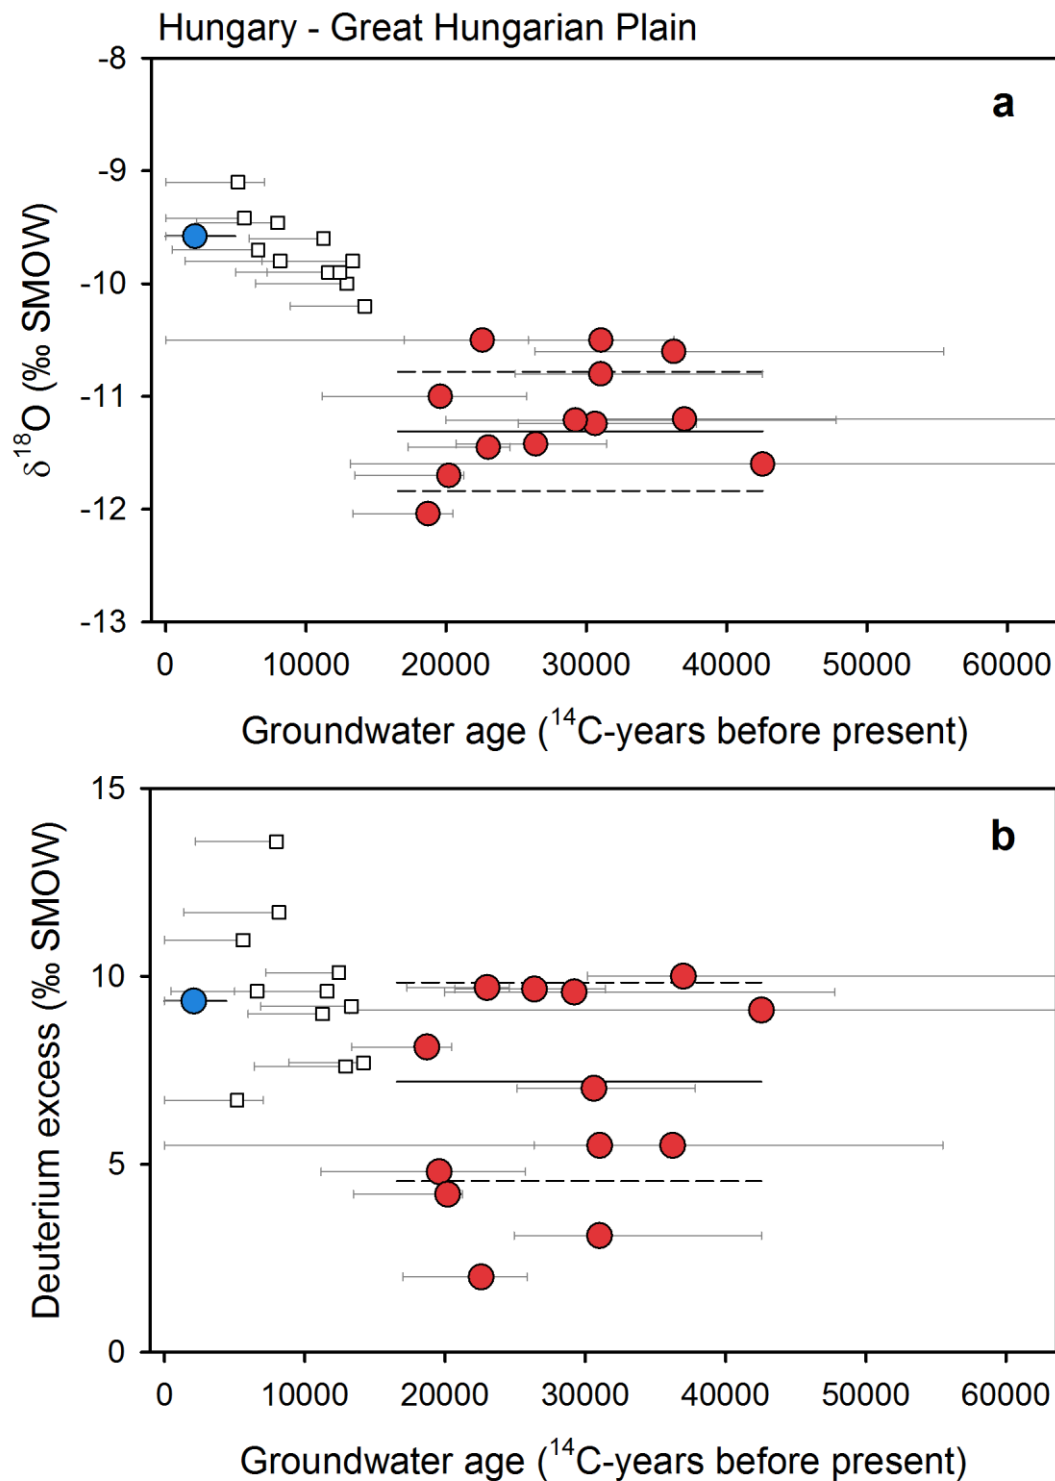

**Figure S21.** Groundwater isotope composition of the Great Hungarian Plain. Groundwater  $\delta^{18}\text{O}$  (a) and deuterium excess (b) plotted against corrected  $^{14}\text{C}$  ages for late-Holocene (blue circles) and late-glacial (red circles) groundwaters. Lines mark the average (solid line) and one standard deviation (dashed lines) for each age group (Stute and Deak, 1989).

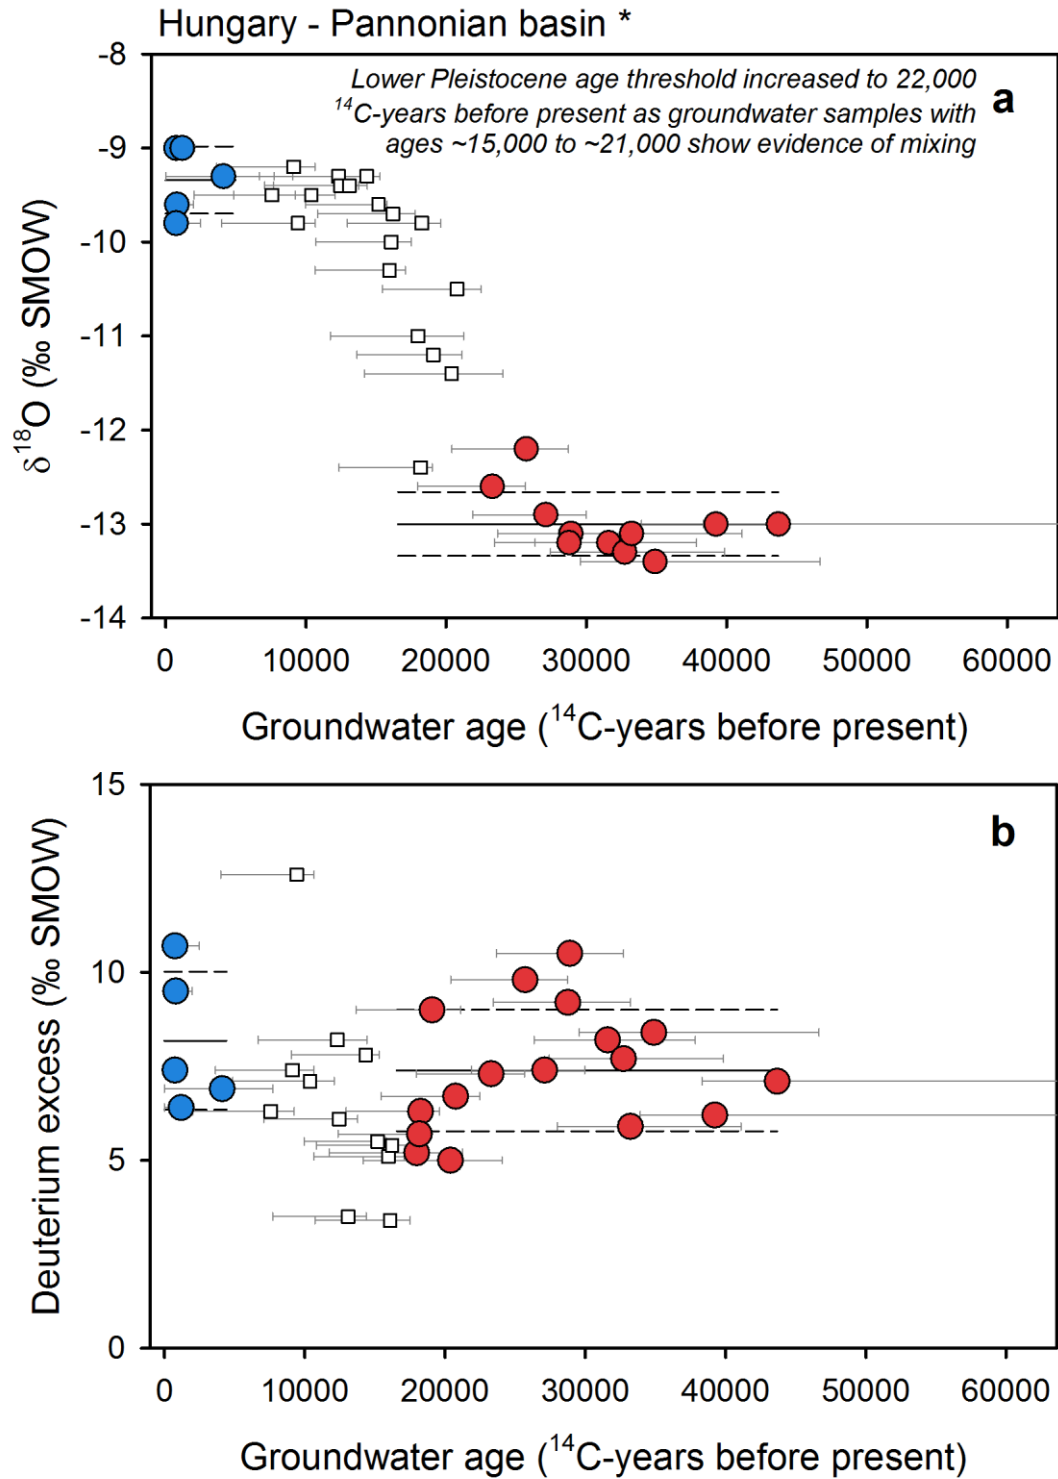

**Figure S22.** Groundwater isotope composition of the Pannonian basin. Groundwater  $\delta^{18}\text{O}$  (a) and deuterium excess (b) plotted against corrected  $^{14}\text{C}$  ages for late-Holocene (blue circles) and late-glacial (red circles) groundwaters. Lines mark the average (solid line) and one standard deviation (dashed lines) for each age group (Varsanyi et al., 2011).

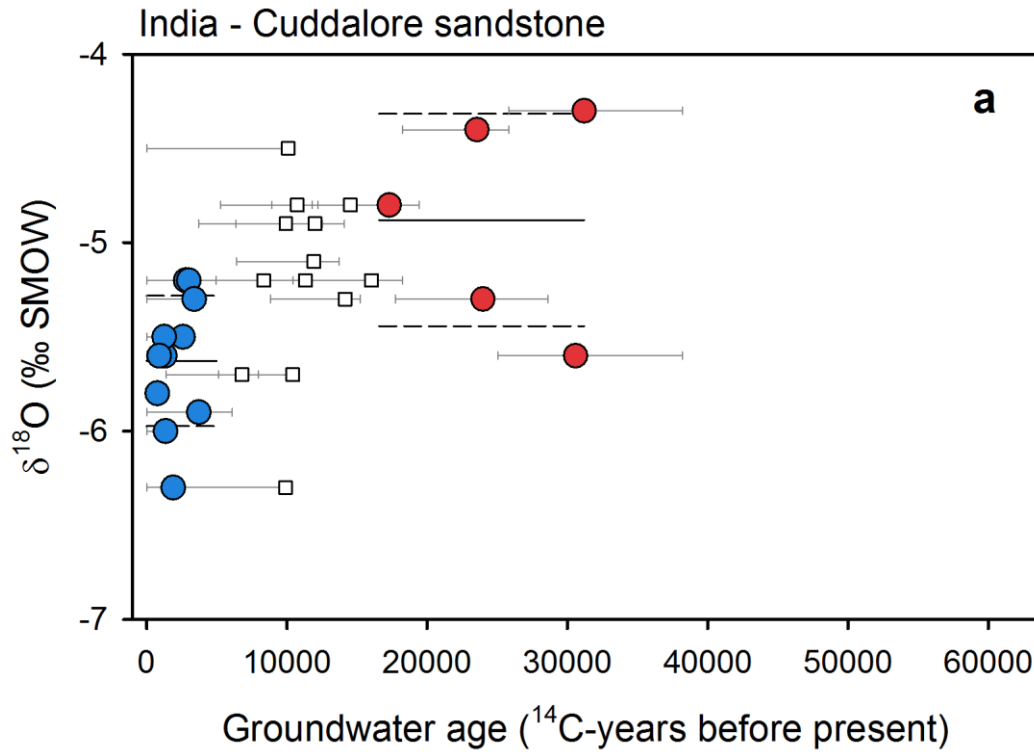

**Figure S23.** Groundwater isotope composition of the Cuddalore sandstone aquifer. Groundwater  $\delta^{18}\text{O}$  plotted against corrected  $^{14}\text{C}$  ages for late-Holocene (blue circles) and late-glacial (red circles) groundwaters. Lines mark the average (solid line) and one standard deviation (dashed lines) for each age group (Sukhija et al., 1998).

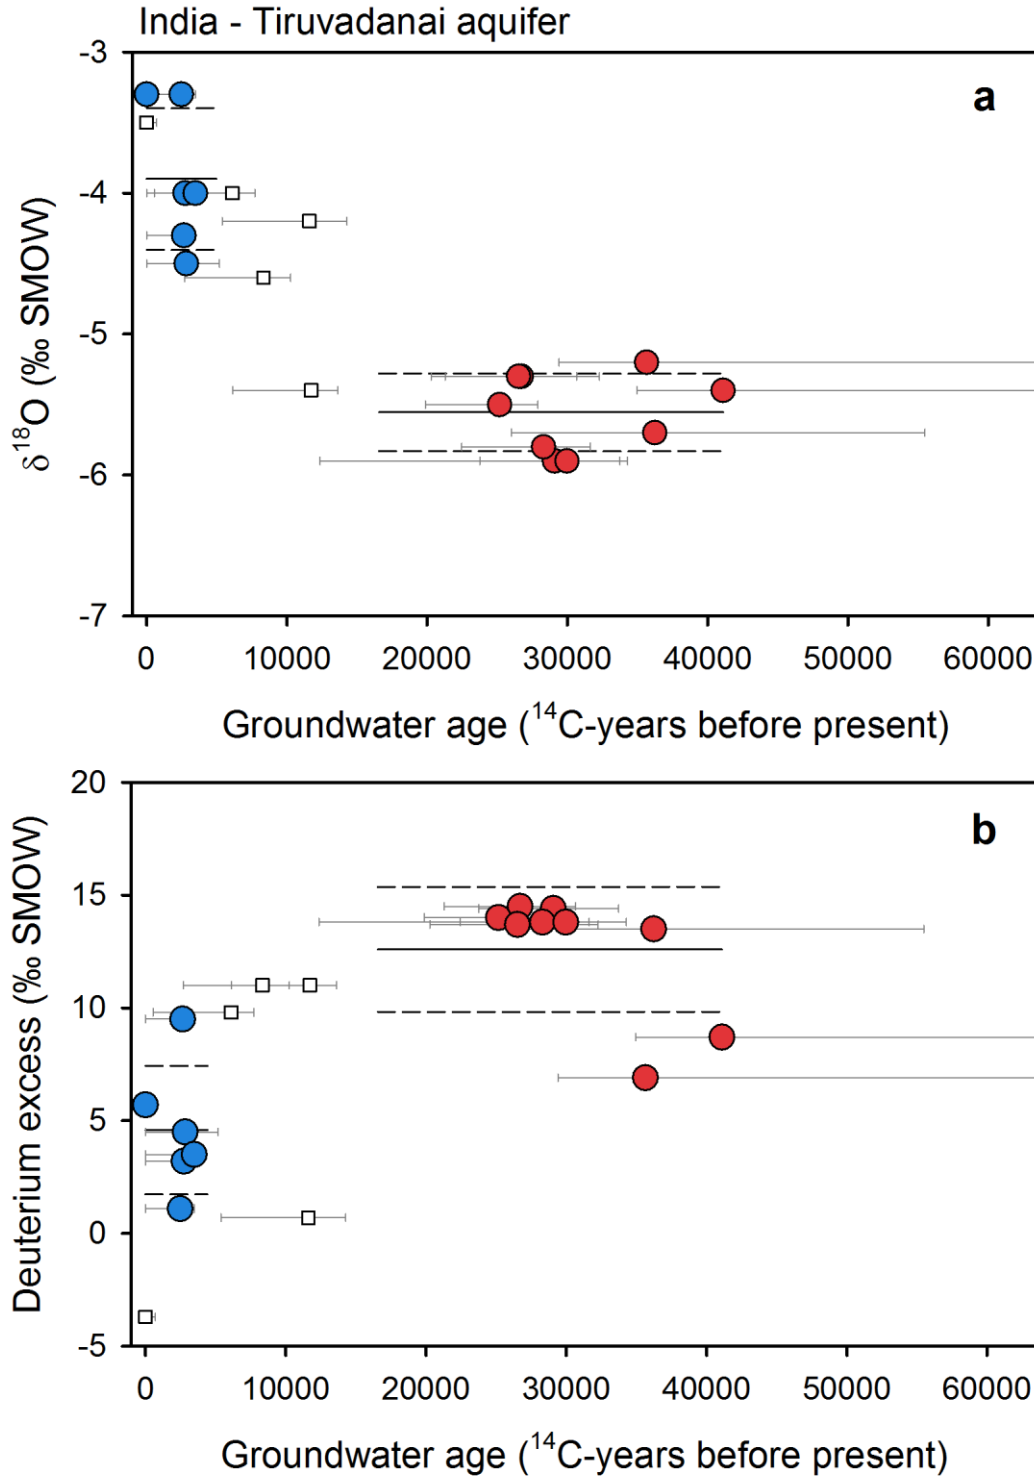

**Figure S24.** Groundwater isotope composition of the Tiruvadanai aquifer. Groundwater  $\delta^{18}\text{O}$  (a) and deuterium excess (b) plotted against corrected  $^{14}\text{C}$  ages for late-Holocene (blue circles) and late-glacial (red circles) groundwaters. Lines mark the average (solid line) and one standard deviation (dashed lines) for each age group (Kumar et al., 2009).

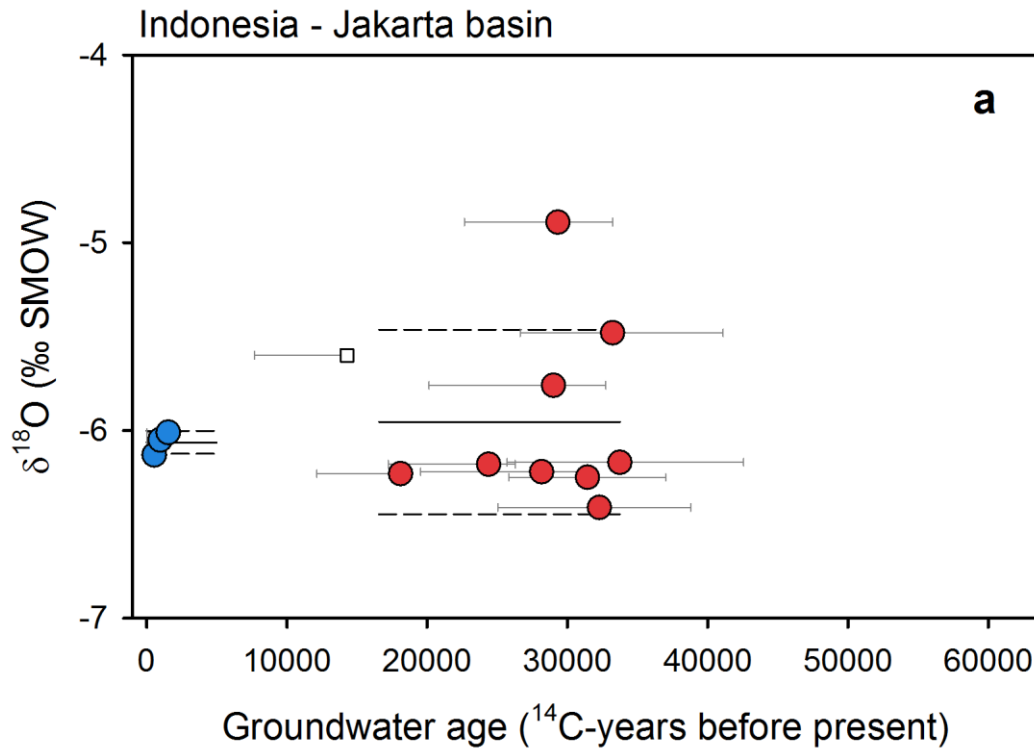

**Figure S25.** Groundwater isotope composition of the Jakarta aquifer. Groundwater  $\delta^{18}\text{O}$  plotted against corrected  $^{14}\text{C}$  ages for late-Holocene (blue circles) and late-glacial (red circles) groundwaters. Lines mark the average (solid line) and one standard deviation (dashed lines) for each age group (Geyh and Söfner, 1989).

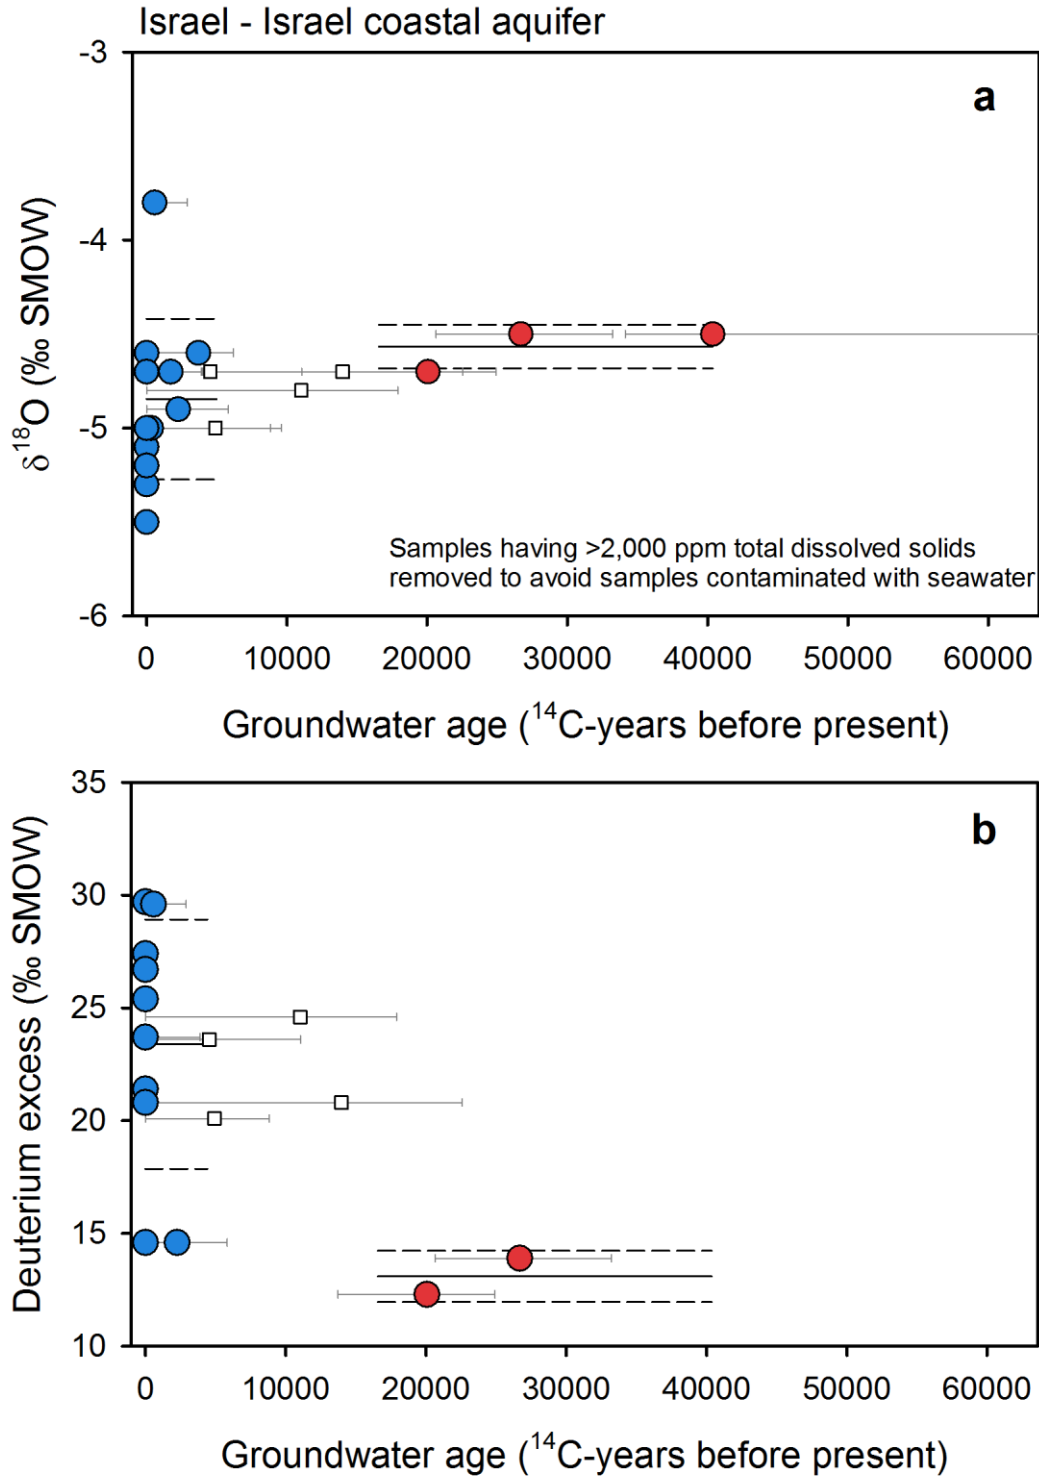

**Figure S26.** Groundwater isotope composition of the Israel coastal aquifer. Groundwater  $\delta^{18}\text{O}$  (a) and deuterium excess (b) plotted against corrected  $^{14}\text{C}$  ages for late-Holocene (blue circles) and late-glacial (red circles) groundwaters. Lines mark the average (solid line) and one standard deviation (dashed lines) for each age group (Yechieli et al., 2009).

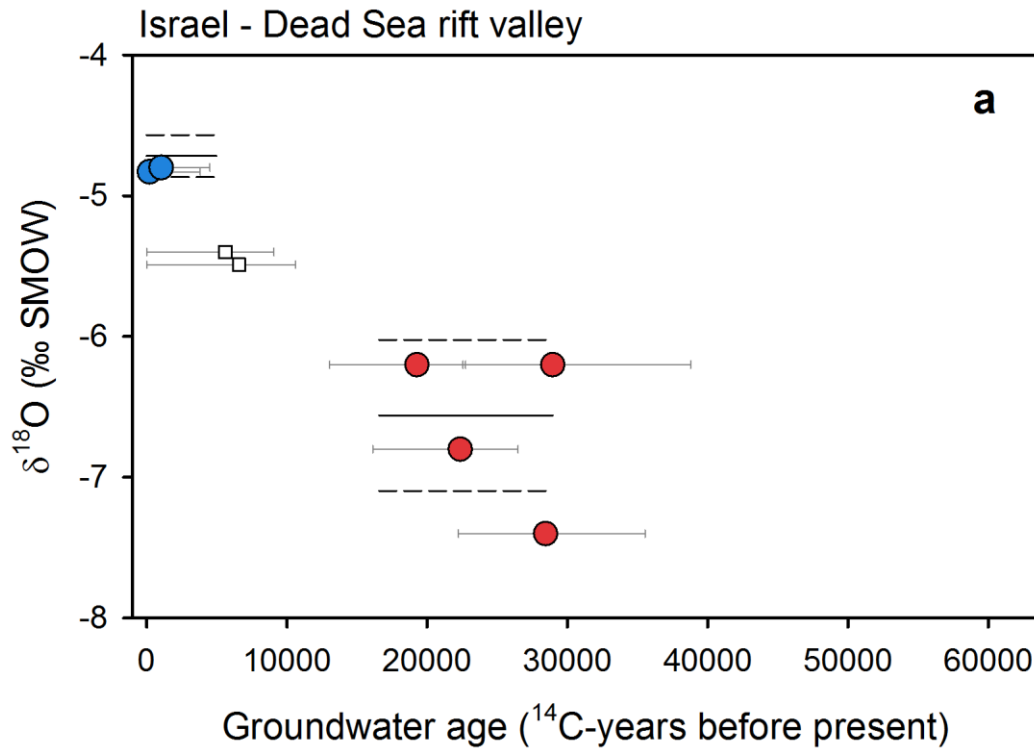

**Figure S27.** Groundwater isotope composition of the Dead Sea Rift aquifer. Groundwater  $\delta^{18}\text{O}$  plotted against corrected  $^{14}\text{C}$  ages for late-Holocene (blue circles) and late-glacial (red circles) groundwaters. Lines mark the average (solid line) and one standard deviation (dashed lines) for each age group (Gat and Galai, 1982; Mazor et al., 1995).

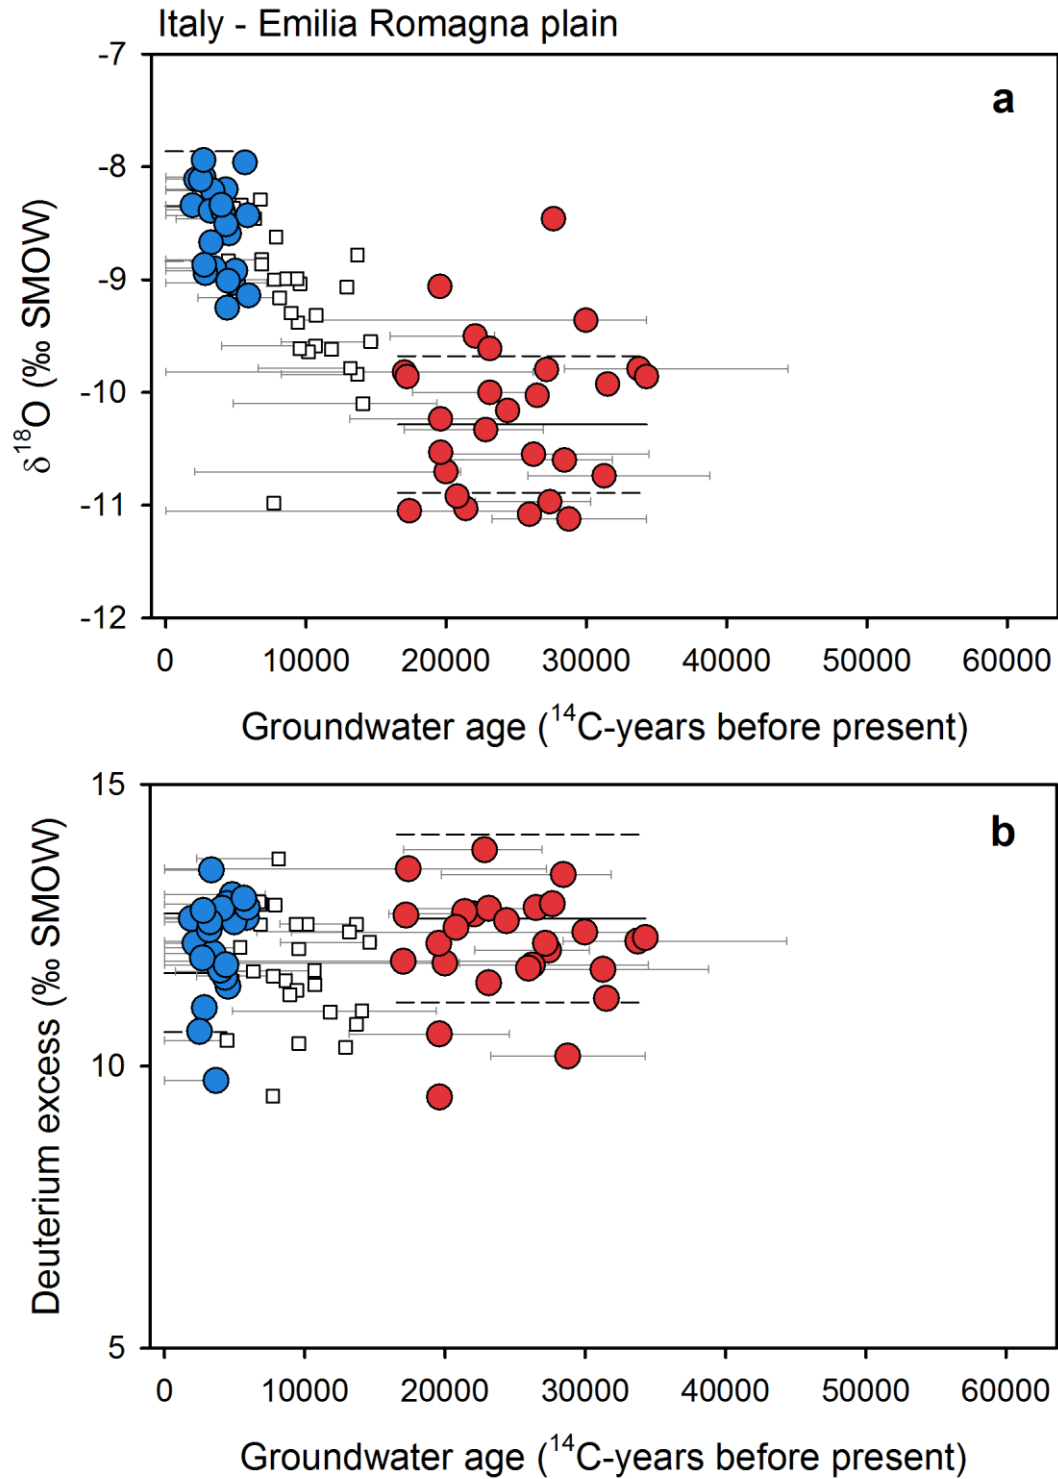

**Figure S28.** Groundwater isotope composition of the Emilia Romagna Plain. Groundwater  $\delta^{18}\text{O}$  (a) and deuterium excess (b) plotted against corrected  $^{14}\text{C}$  ages for late-Holocene (blue circles) and late-glacial (red circles) groundwaters. Lines mark the average (solid line) and one standard deviation (dashed lines) for each age group (Martinelli et al., 2011).

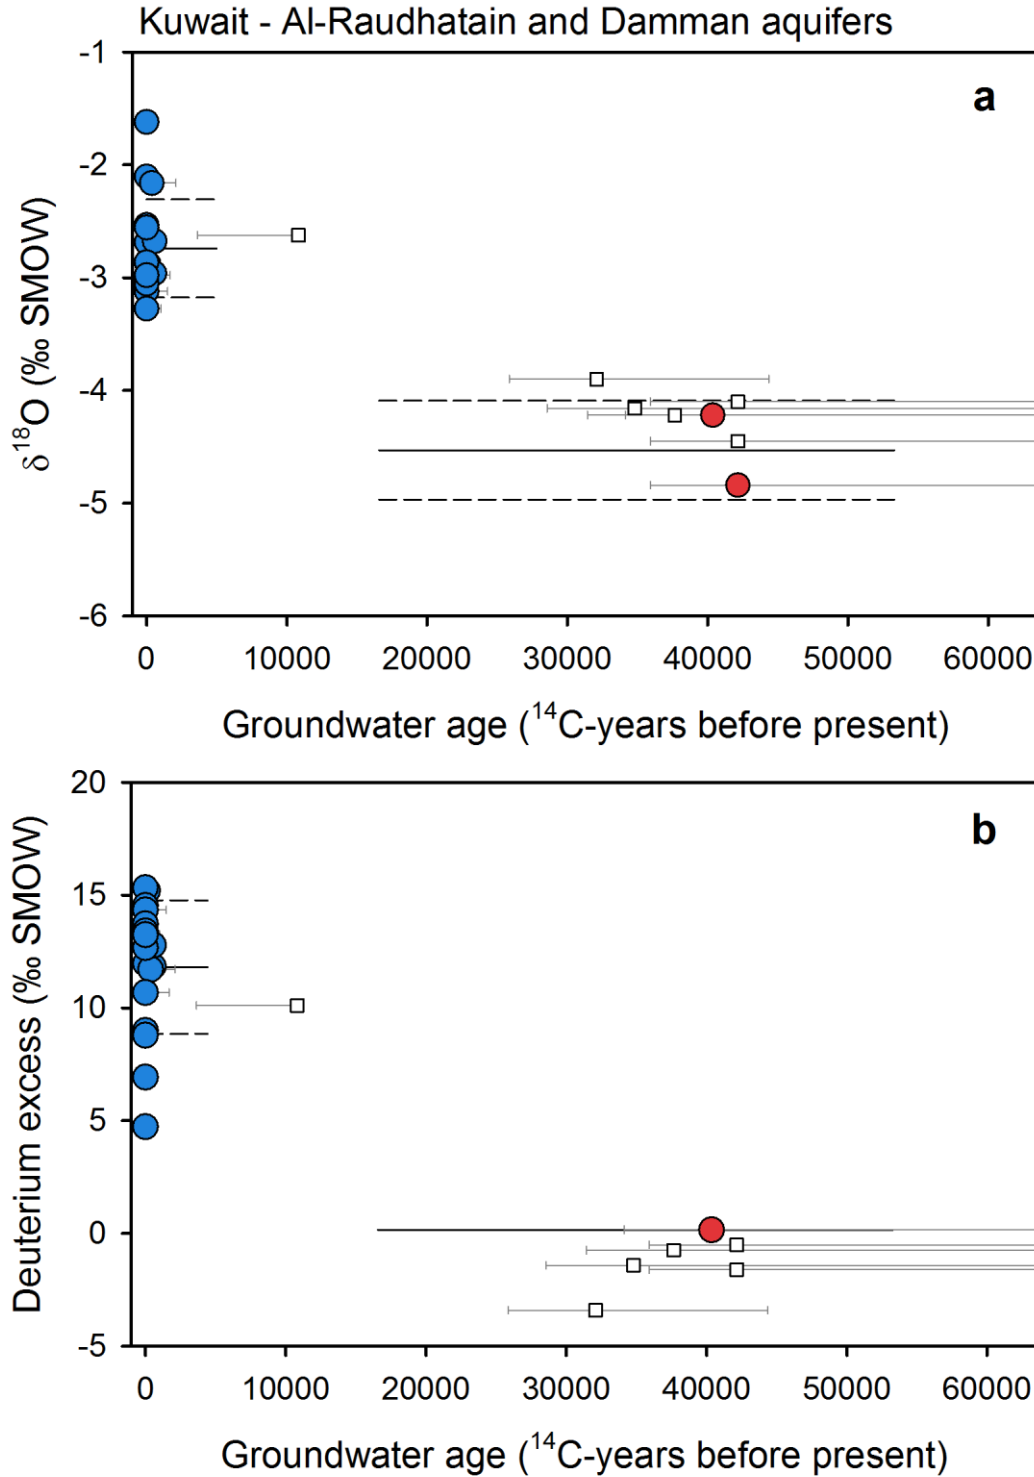

**Figure S29.** Groundwater isotope composition of the Al-Raudhatain and Damman aquifer. Groundwater  $\delta^{18}\text{O}$  (a) and deuterium excess (b) plotted against corrected  $^{14}\text{C}$  ages for late-Holocene (blue circles) and late-glacial (red circles) groundwaters. The average (solid line) and 1 s.d. (dashed lines) are shown for each group (Al-Ruwaih and Shehata, 2004; Fadlelmawla et al., 2008).

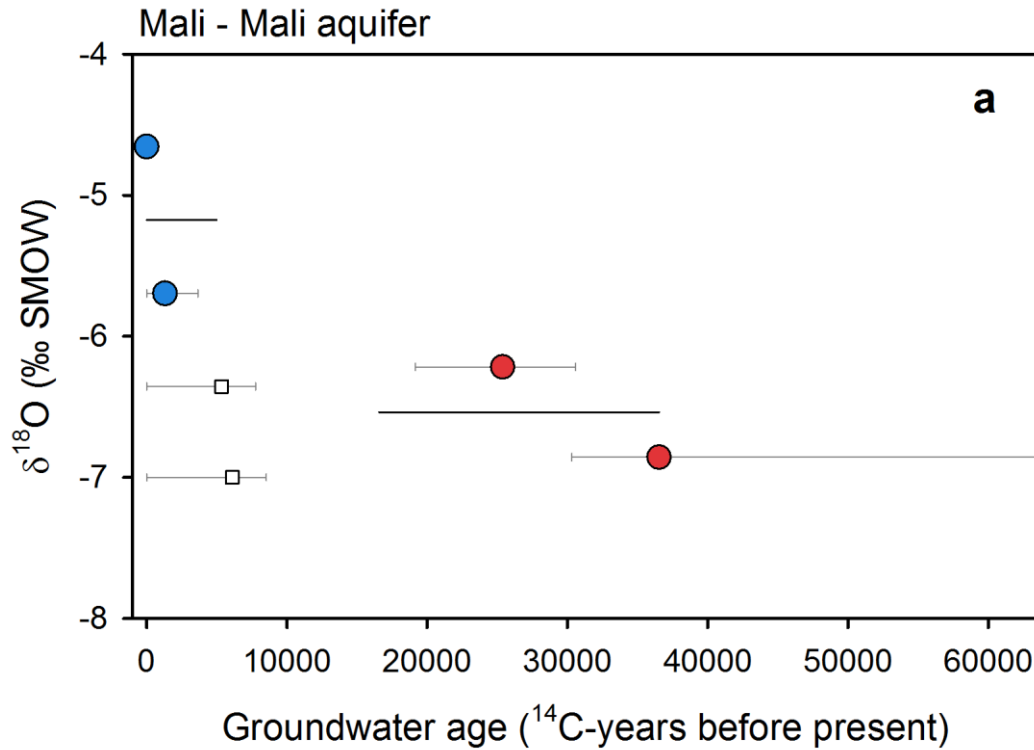

**Figure S30.** Groundwater isotope composition of the Mali aquifer. Groundwater  $\delta^{18}\text{O}$  plotted against corrected  $^{14}\text{C}$  ages for late-Holocene (blue circles) and late-glacial (red circles) groundwaters. Lines mark the average (solid line) and one standard deviation (dashed lines) for each age group (Edmunds, 2009).

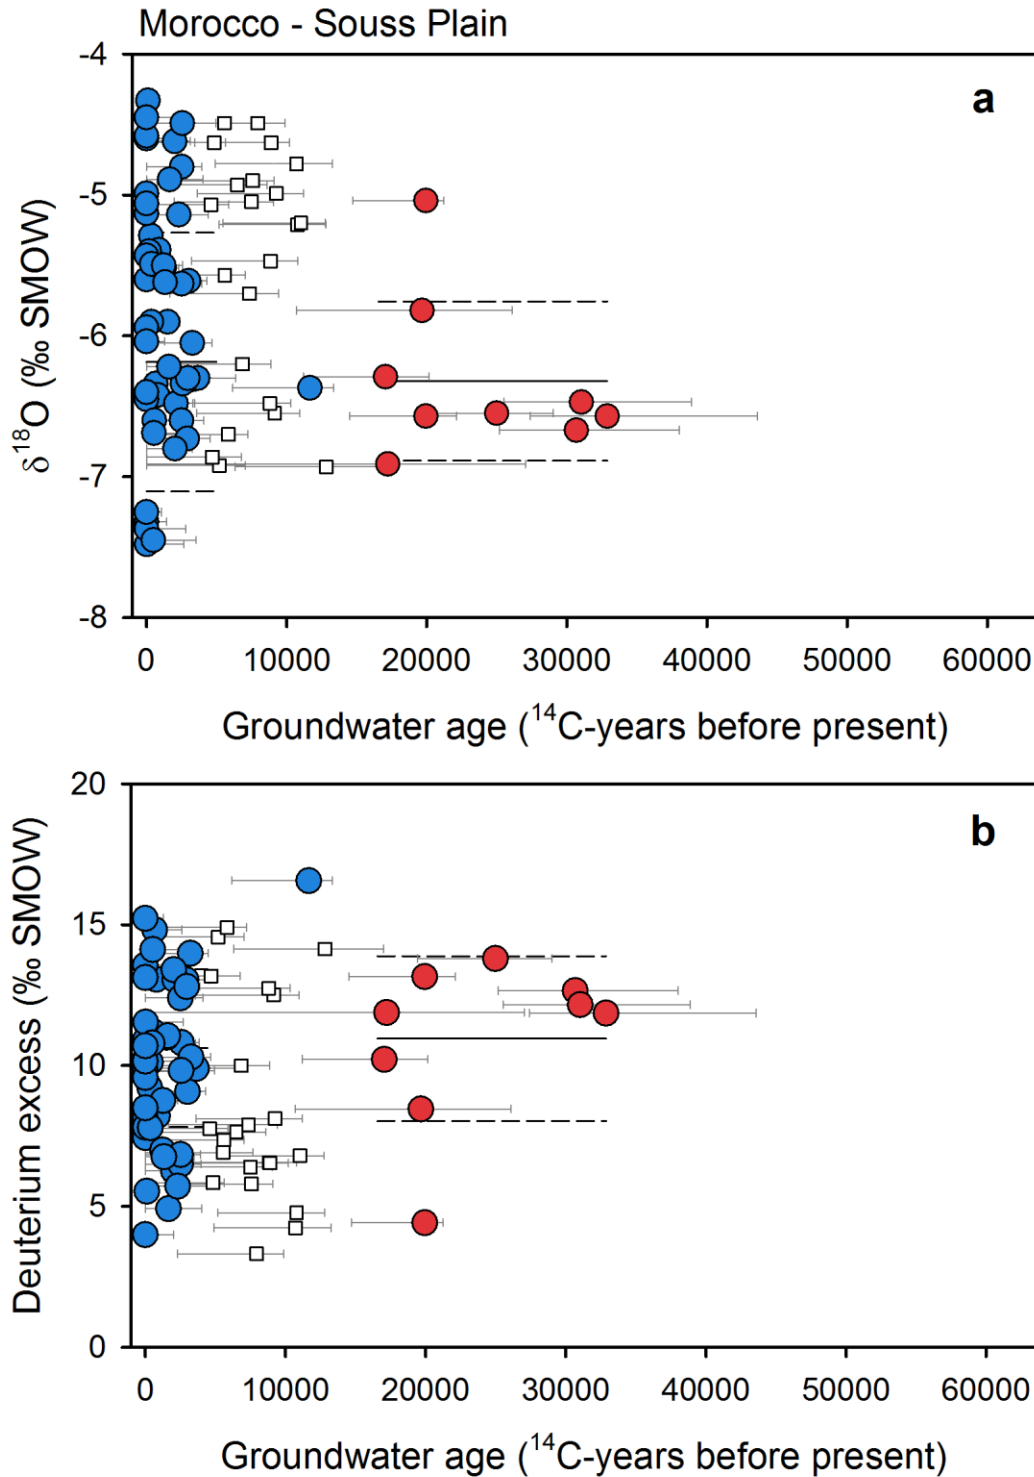

**Figure S31.** Groundwater isotope composition of the Tadla basin. Groundwater  $\delta^{18}\text{O}$  (a) and deuterium excess (b) plotted against corrected  $^{14}\text{C}$  ages for late-Holocene (blue circles) and late-glacial (red circles) groundwaters. Lines mark the average (solid line) and one standard deviation (dashed lines) for each age group (Castany et al., 1974).

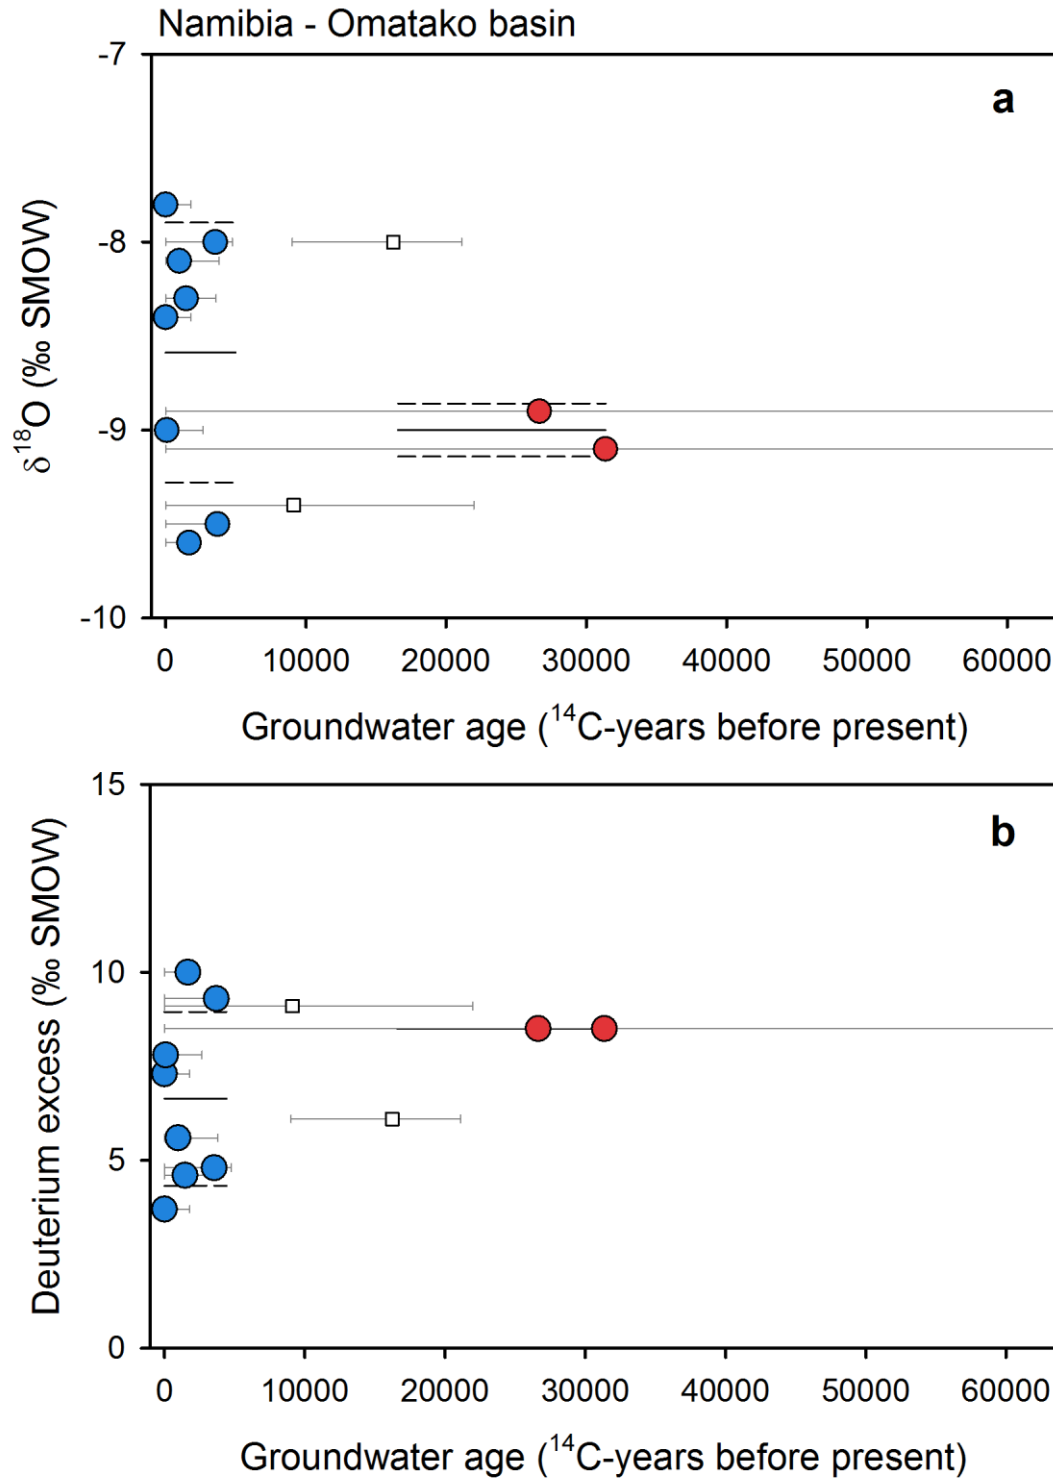

**Figure S32.** Groundwater isotope composition of the Omatako basin. Groundwater  $\delta^{18}\text{O}$  (a) and deuterium excess (b) plotted against corrected  $^{14}\text{C}$  ages for late-Holocene (blue circles) and late-glacial (red circles) groundwaters. Lines mark the average (solid line) and one standard deviation (dashed lines) for each age group (Külls, 2000).

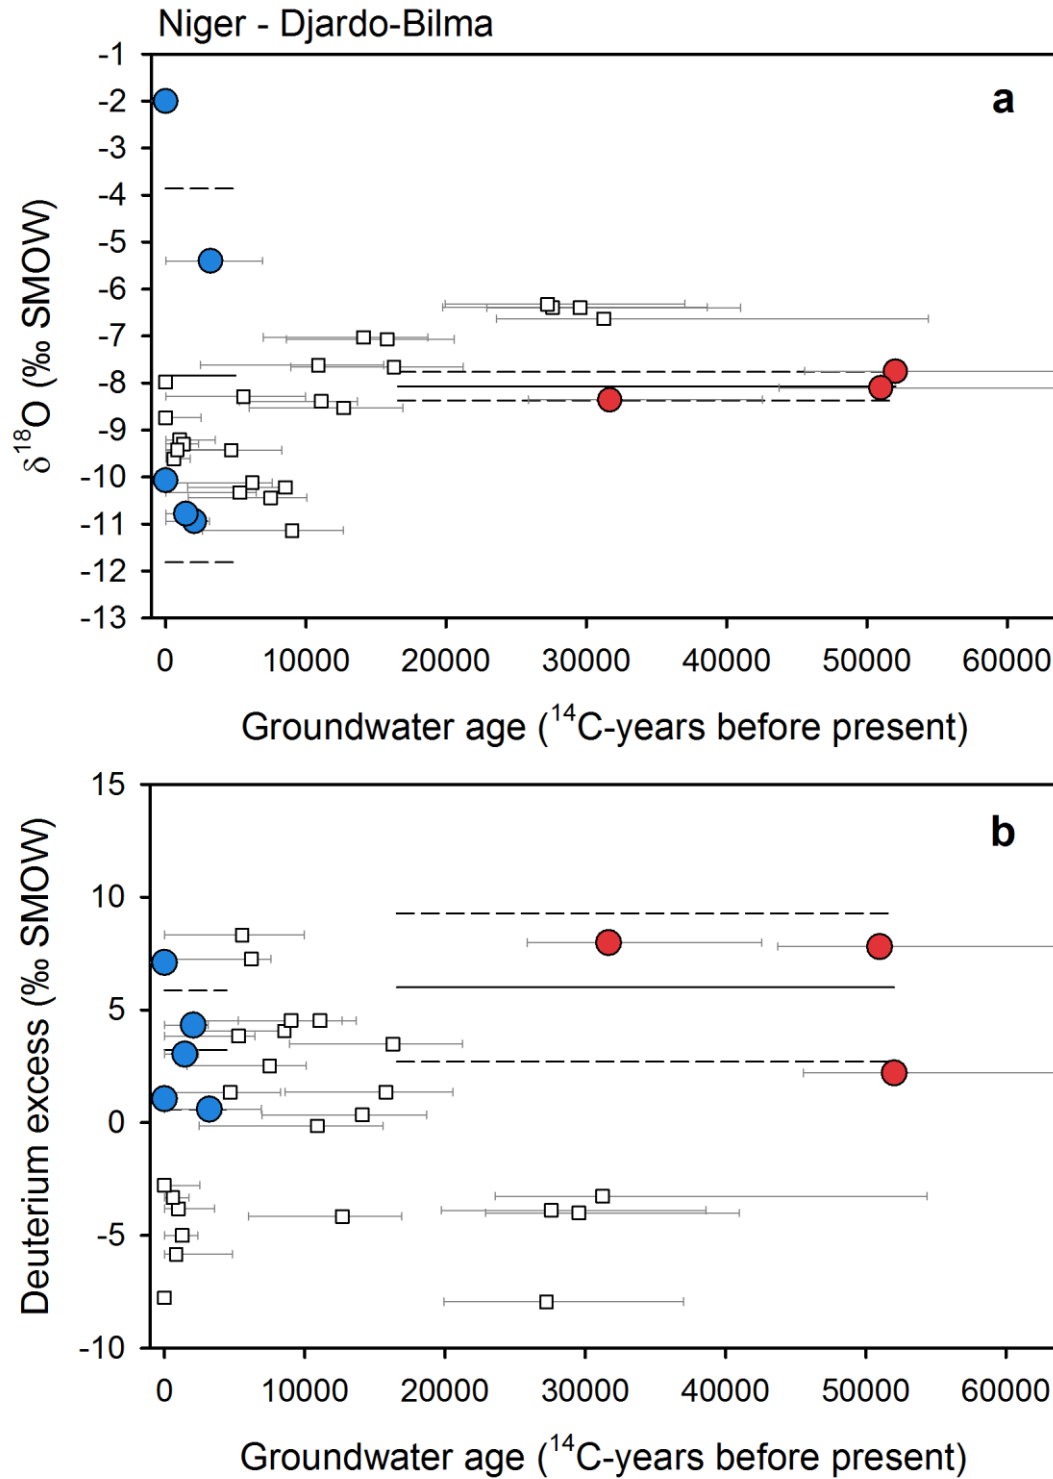

**Figure S33.** Groundwater isotope composition of the Djardo-Bilma basin. Groundwater  $\delta^{18}\text{O}$  (a) and deuterium excess (b) plotted against corrected  $^{14}\text{C}$  ages for late-Holocene (blue circles) and late-glacial (red circles) groundwaters. Lines mark the average (solid line) and one standard deviation (dashed lines) for each age group (Dodo and Zuppi, 1997; 1999).

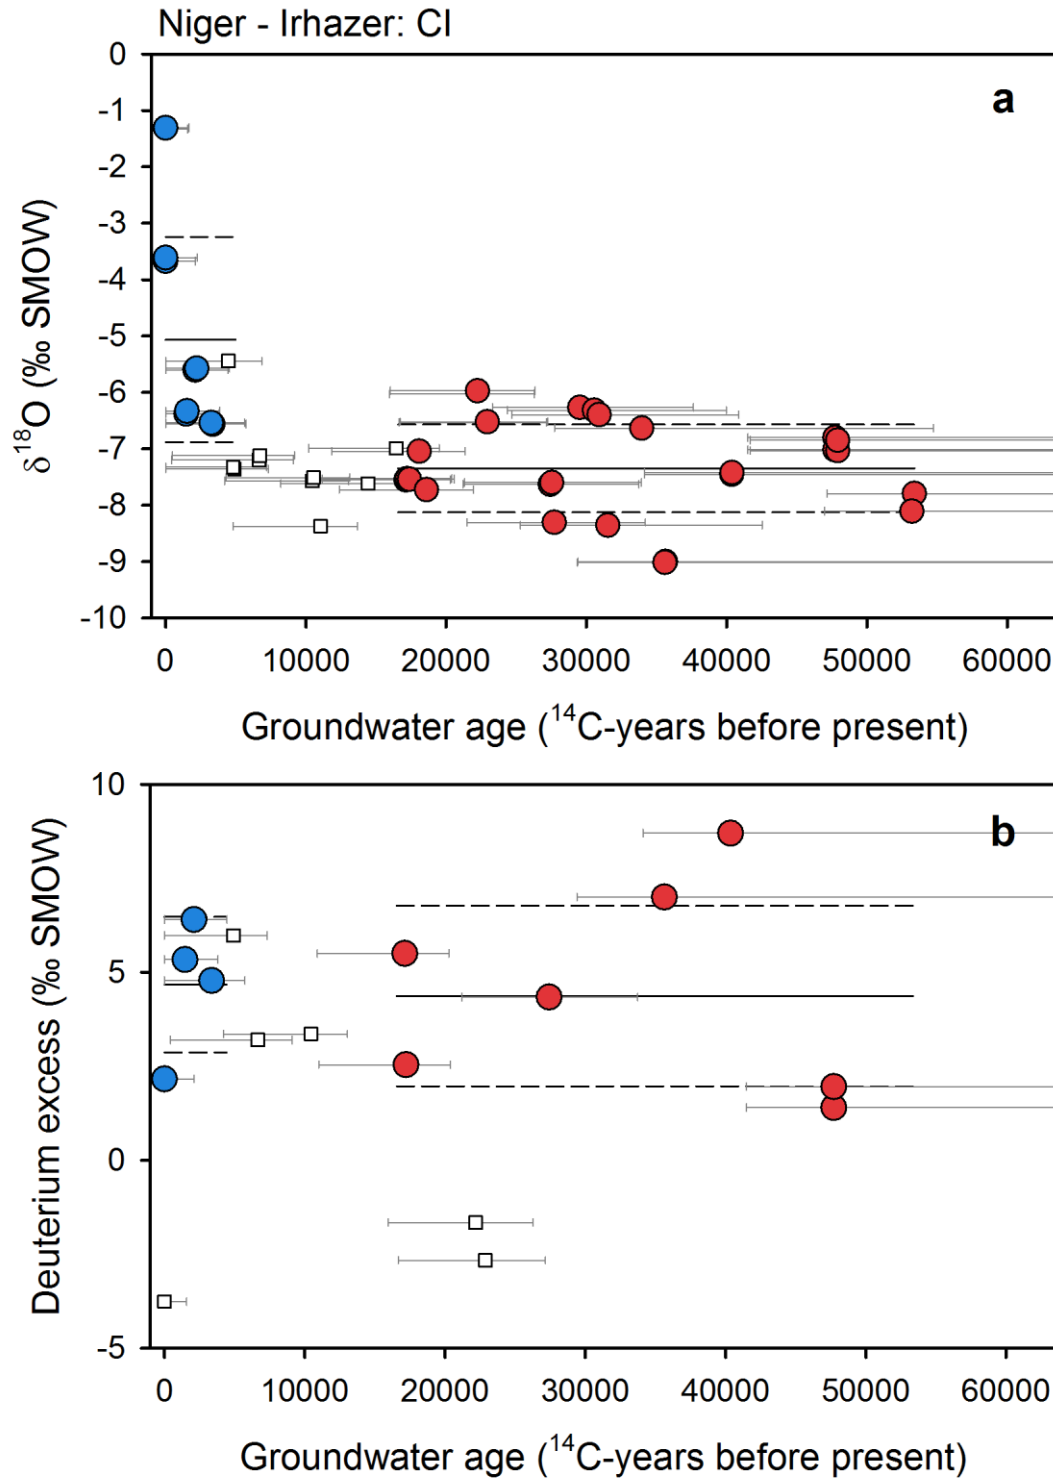

**Figure S34.** Groundwater isotope composition of the Irhazer aquifer (Continental Intercalaire). Groundwater  $\delta^{18}\text{O}$  (a) and deuterium excess (b) plotted against corrected  $^{14}\text{C}$  ages for late-Holocene (blue circles) and late-glacial (red circles) groundwaters. Lines mark the average (solid line) and one standard deviation (dashed lines) for each age group (Andrews et al., 1994; Edmunds, 2004).

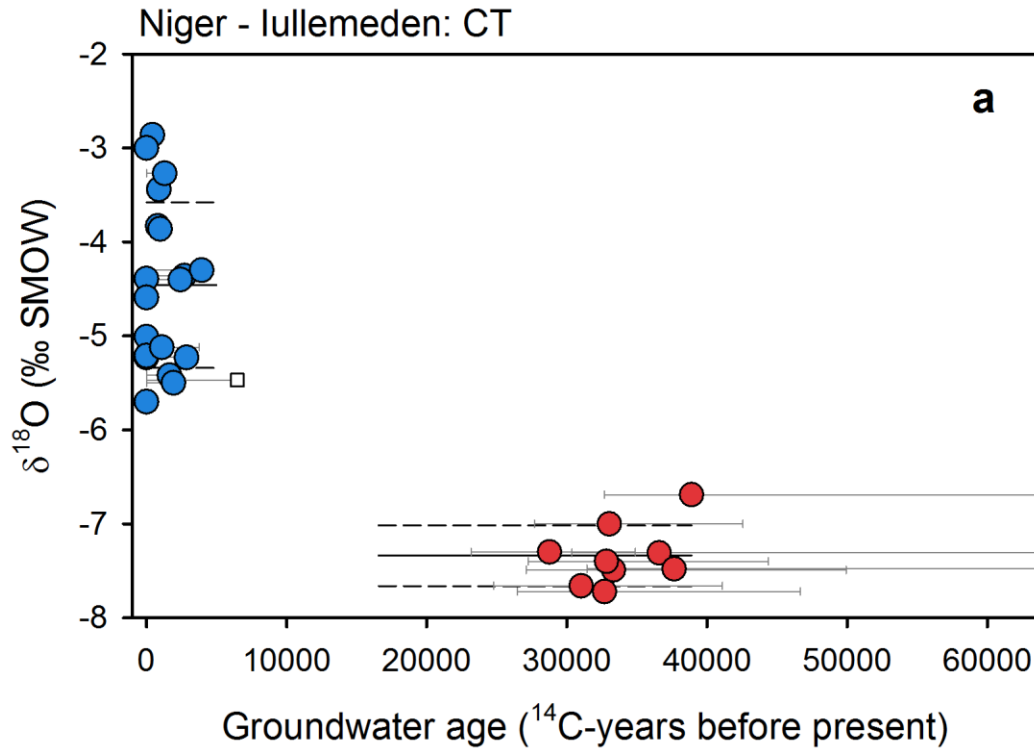

**Figure S35.** Groundwater isotope composition of the Iullemeden aquifer (Continental Terminal). Groundwater  $\delta^{18}\text{O}$  plotted against corrected  $^{14}\text{C}$  ages for late-Holocene (blue circles) and late-glacial (red circles) groundwaters. Lines mark the average (solid line) and one standard deviation (dashed lines) for each age group (Le Gal La Salle et al., 2001; Beyerle et al., 2003).

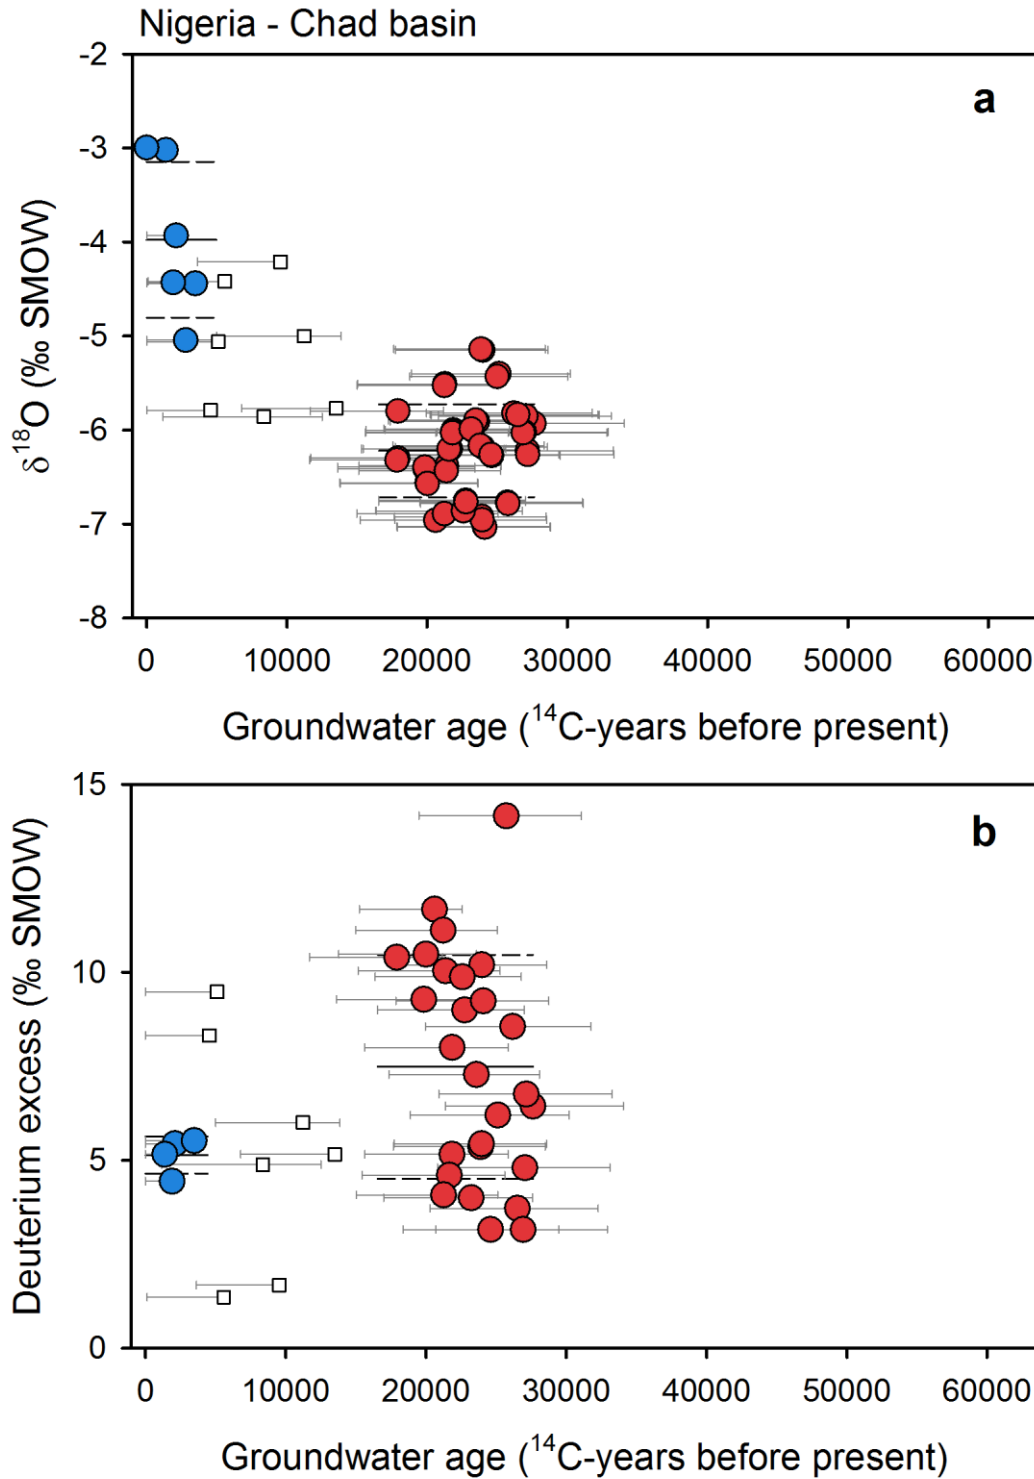

**Figure S36.** Groundwater isotope composition of the Chad aquifer (in Nigeria). Groundwater  $\delta^{18}\text{O}$  (a) and deuterium excess (b) plotted against corrected  $^{14}\text{C}$  ages for late-Holocene (blue circles) and late-glacial (red circles) groundwaters. Lines mark the average (solid line) and one standard deviation (dashed lines) for each age group (Maduabuchi et al., 2006).

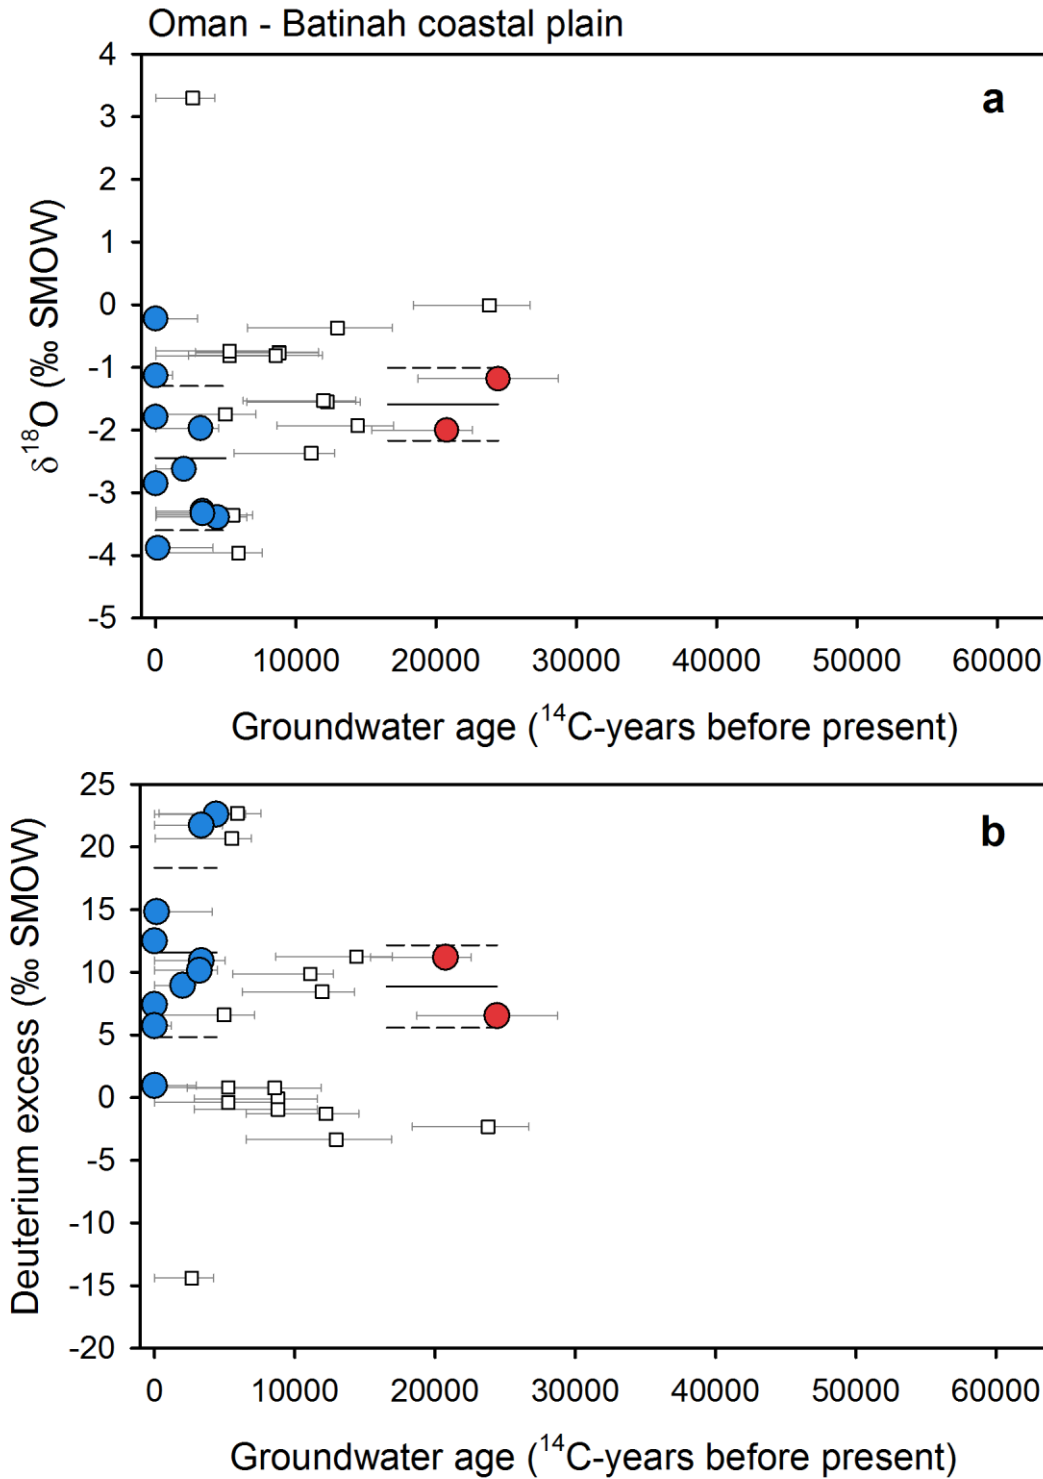

**Figure S37.** Groundwater isotope composition of the Batinah coastal aquifer system. Groundwater  $\delta^{18}\text{O}$  (a) and deuterium excess (b) plotted against corrected  $^{14}\text{C}$  ages for late-Holocene (blue circles) and late-glacial (red circles) groundwaters. Lines mark the average (solid line) and one standard deviation (dashed lines) for each age group (Weyhenmeyer et al., 2000; 2002).

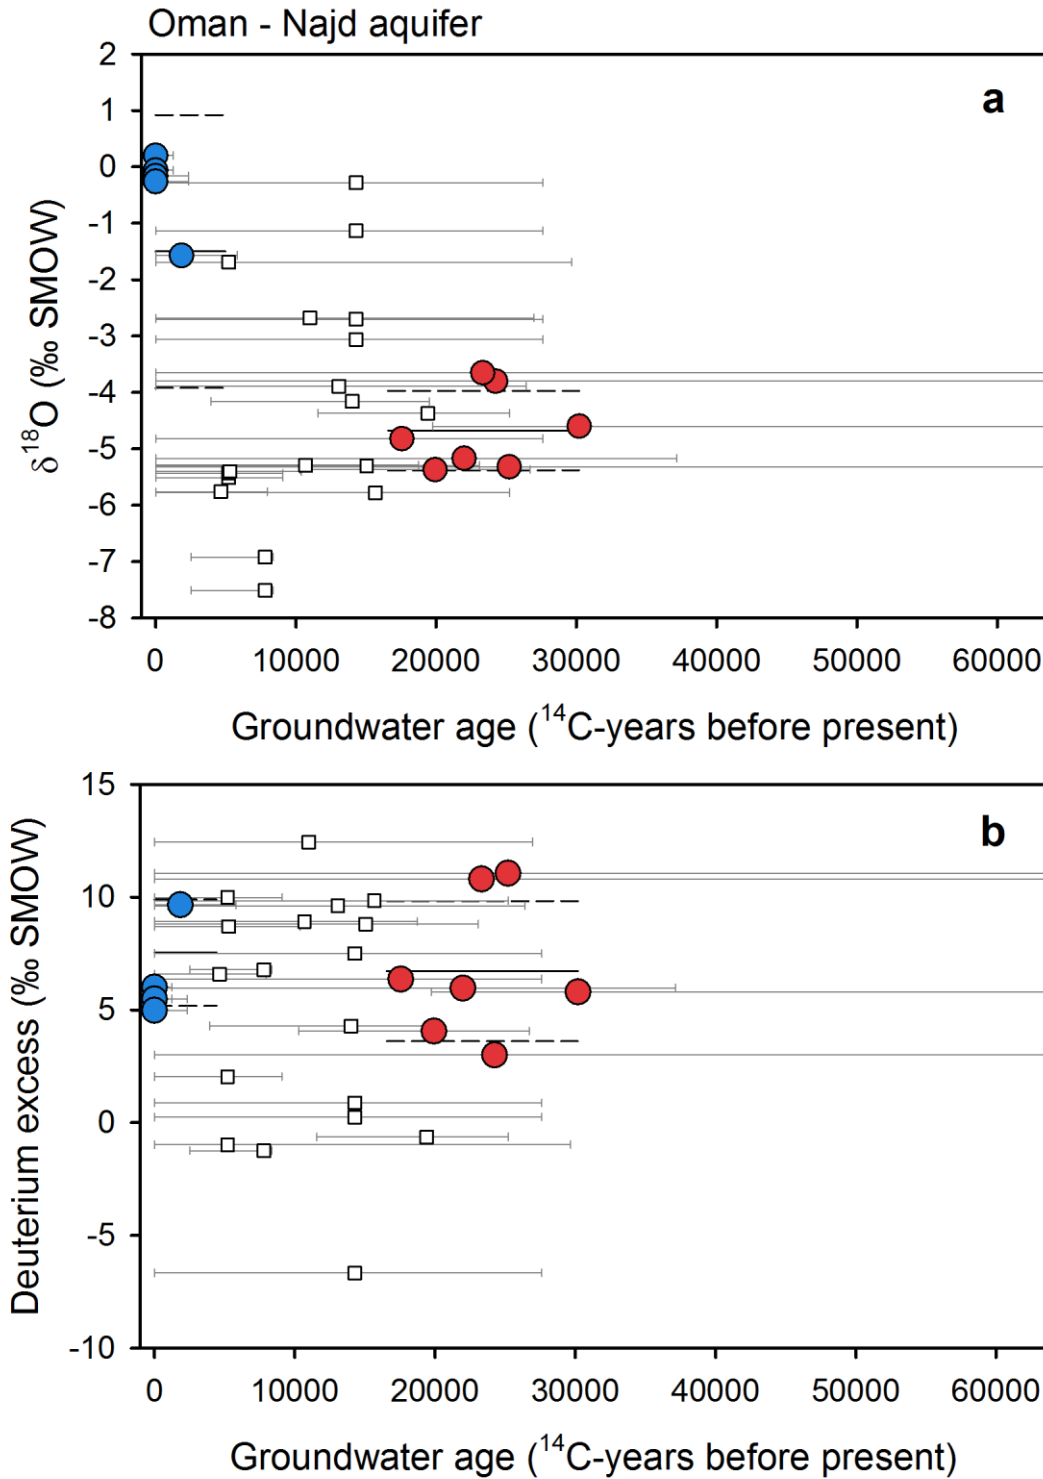

**Figure S38.** Groundwater isotope composition of the Najd aquifer. Groundwater  $\delta^{18}\text{O}$  (a) and deuterium excess (b) plotted against corrected  $^{14}\text{C}$  ages for late-Holocene (blue circles) and late-glacial (red circles) groundwaters. Lines mark the average (solid line) and one standard deviation (dashed lines) for each age group (Clark et al., 1987; Al-Mashaikhi et al., 2012).

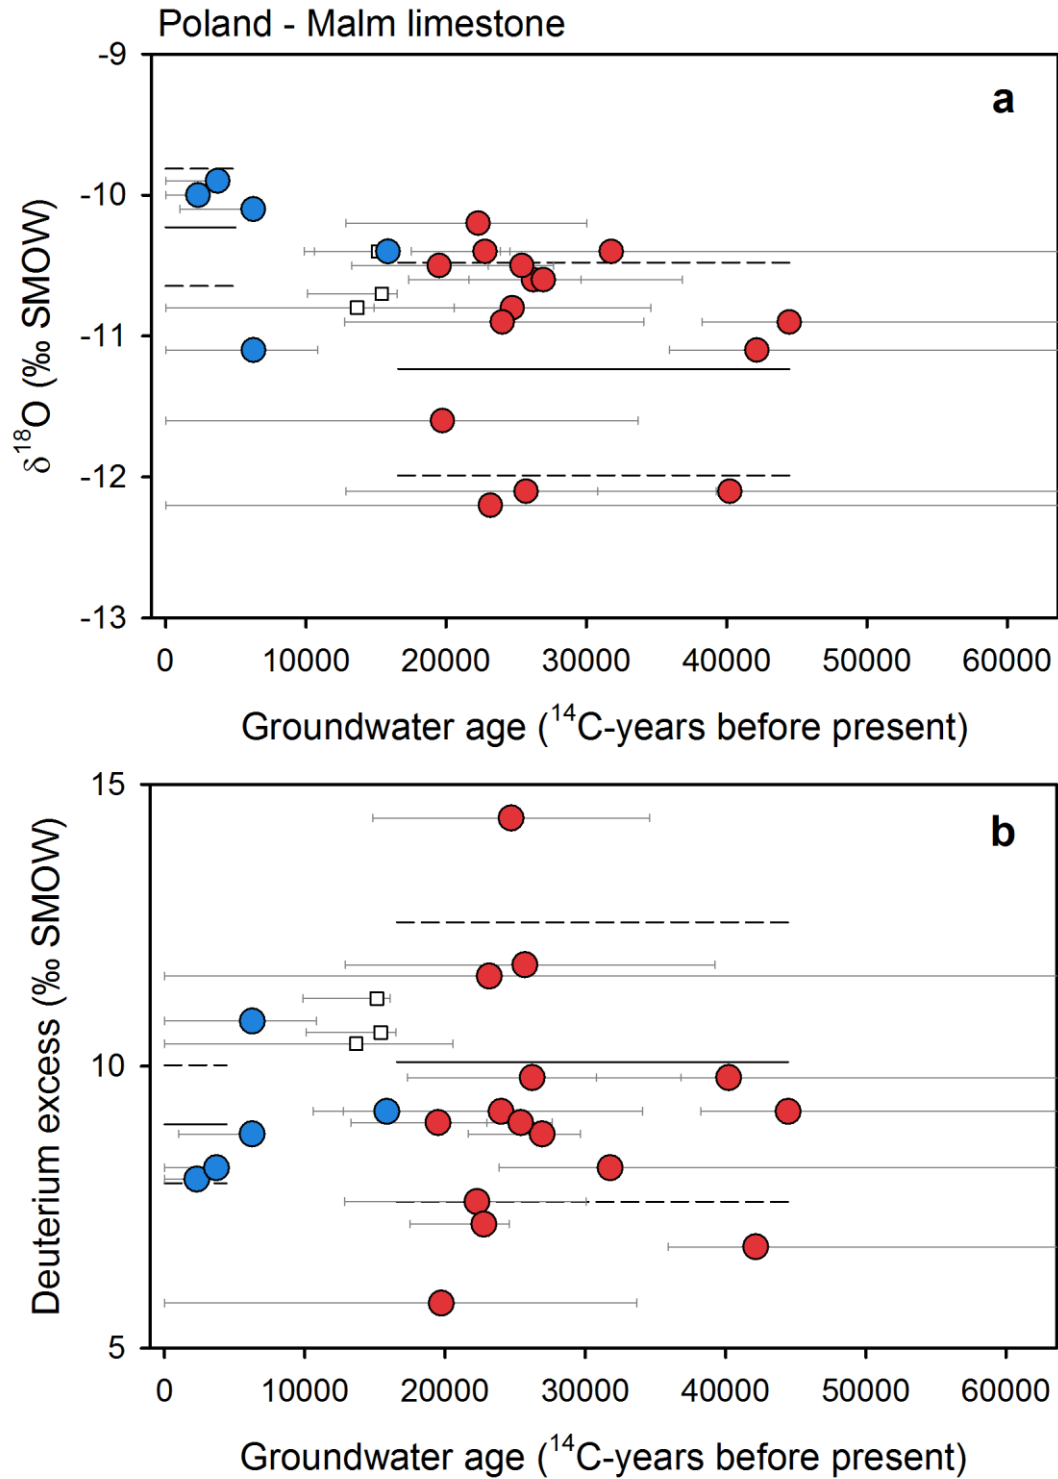

**Figure S39.** Groundwater isotope composition of the Malm limestone aquifer. Groundwater  $\delta^{18}\text{O}$  (a) and deuterium excess (b) plotted against corrected  $^{14}\text{C}$  ages for late-Holocene (blue circles) and late-glacial (red circles) groundwaters. Lines mark the average (solid line) and one standard deviation (dashed lines) for each age group (Zuber et al., 2004).

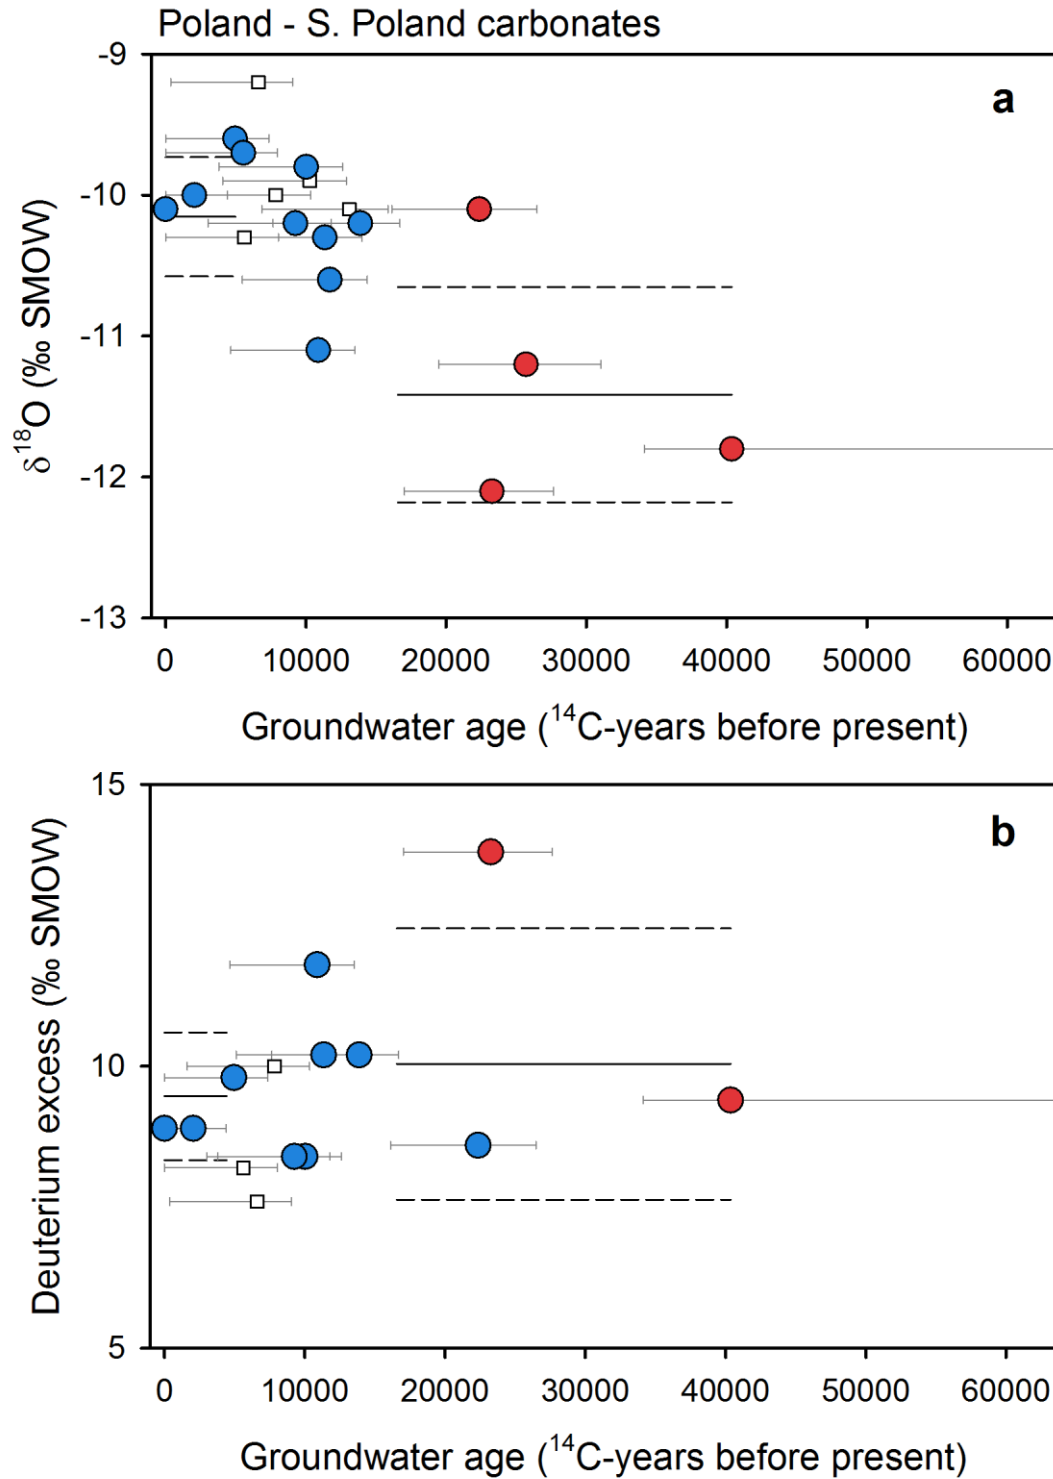

**Figure S40.** Groundwater isotope composition of the carbonate aquifer system of southern Poland. Groundwater  $\delta^{18}\text{O}$  (a) and deuterium excess (b) plotted against corrected  $^{14}\text{C}$  ages for late-Holocene (blue circles) and late-glacial (red circles) groundwaters. Lines mark the average (solid line) and one standard deviation (dashed lines) for each age group (Samborska et al., 2013).

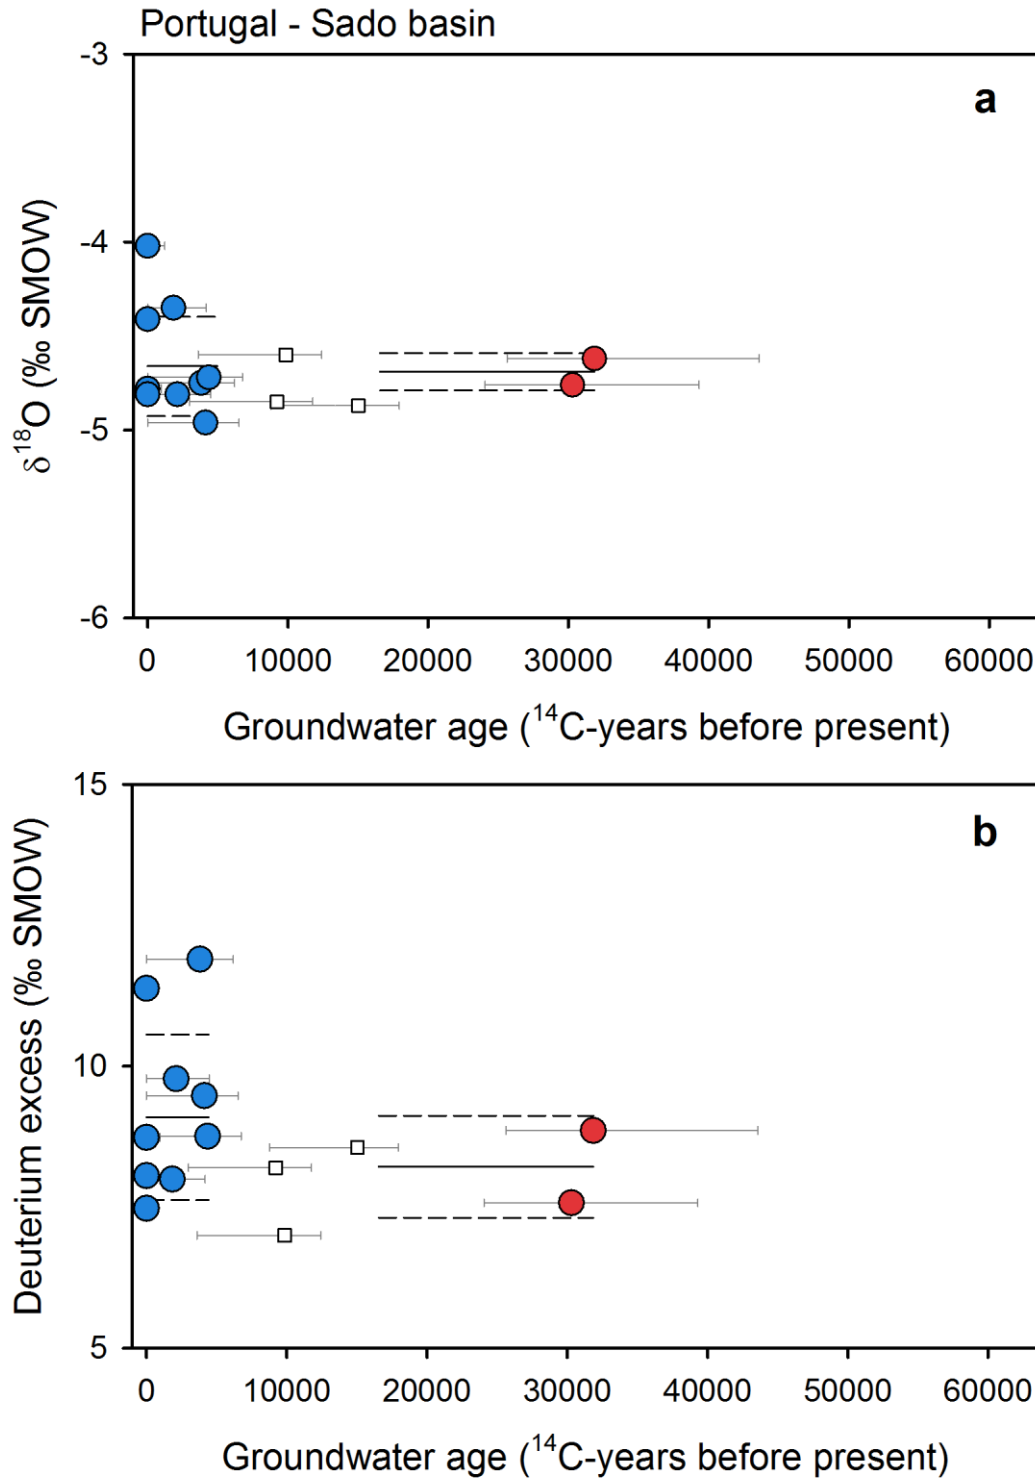

**Figure S41.** Groundwater isotope composition of the Sado basin. Groundwater  $\delta^{18}\text{O}$  (a) and deuterium excess (b) plotted against corrected  $^{14}\text{C}$  ages for late-Holocene (blue circles) and late-glacial (red circles) groundwaters. Lines mark the average (solid line) and one standard deviation (dashed lines) for each age group (Galego Fernandes and Carreira, 2008).

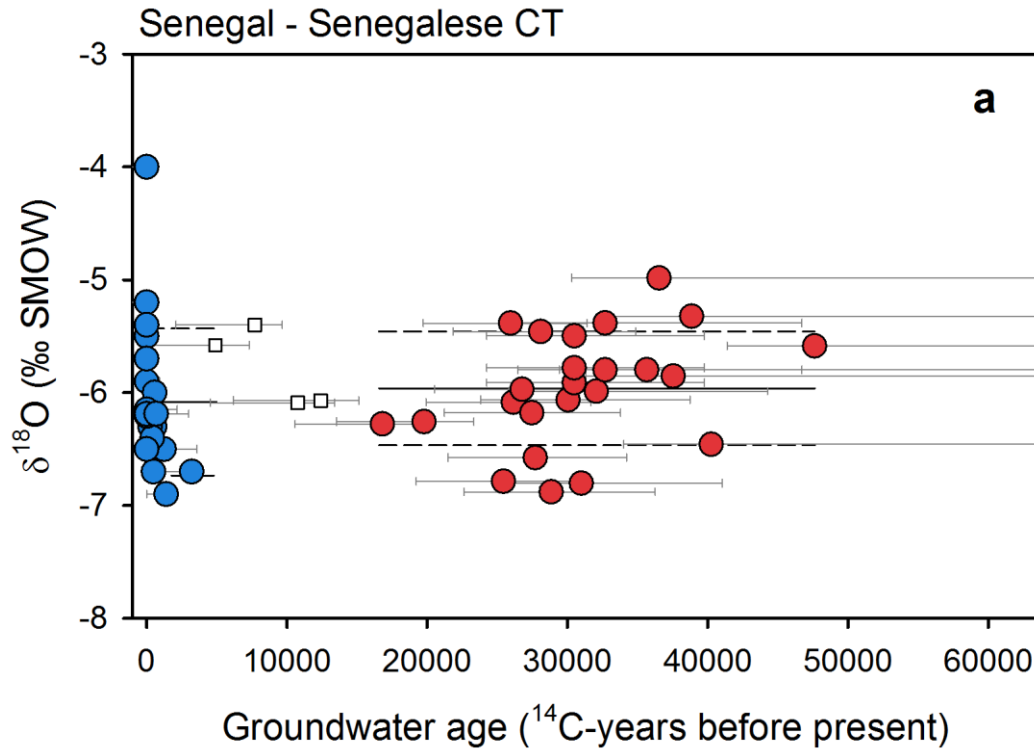

**Figure S42.** Groundwater isotope composition of the Senegalese Continental Terminal aquifer. Groundwater  $\delta^{18}\text{O}$  plotted against corrected  $^{14}\text{C}$  ages for late-Holocene (blue circles) and late-glacial (red circles) groundwaters. Lines mark the average (solid line) and one standard deviation (dashed lines) for each age group (Castany et al., 1974; Edmunds, 2009).

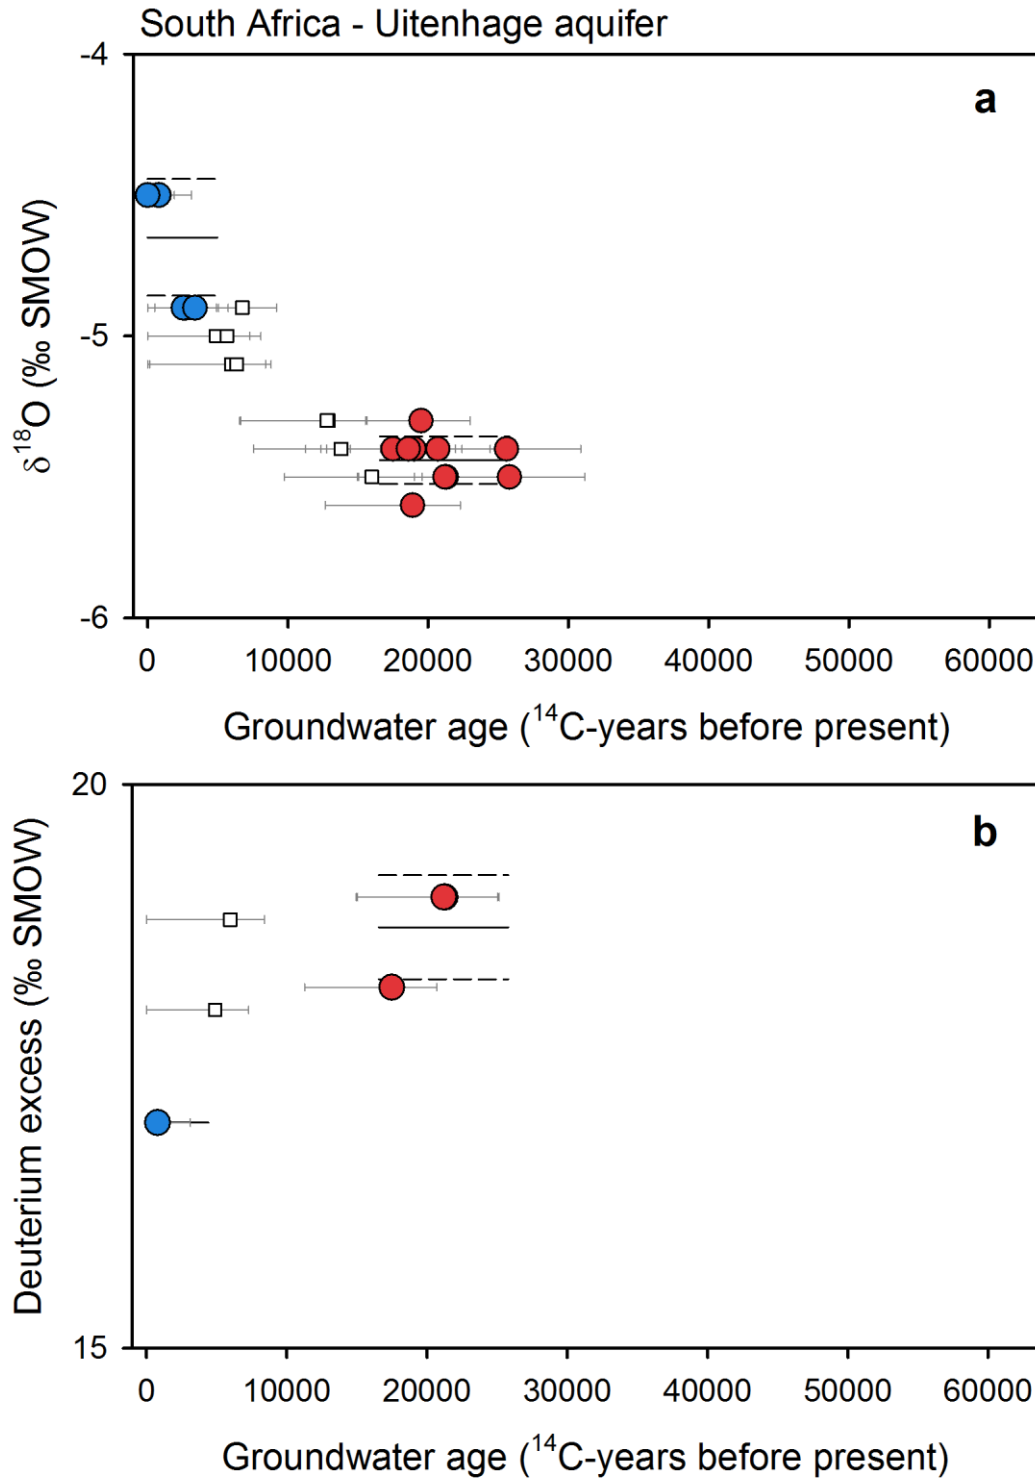

**Figure S43.** Groundwater isotope composition of the Uitenhage aquifer. Groundwater  $\delta^{18}\text{O}$  (a) and deuterium excess (b) plotted against corrected  $^{14}\text{C}$  ages for late-Holocene (blue circles) and late-glacial (red circles) groundwaters. Lines mark the average (solid line) and one standard deviation (dashed lines) for each age group (Heaton et al., 1986).

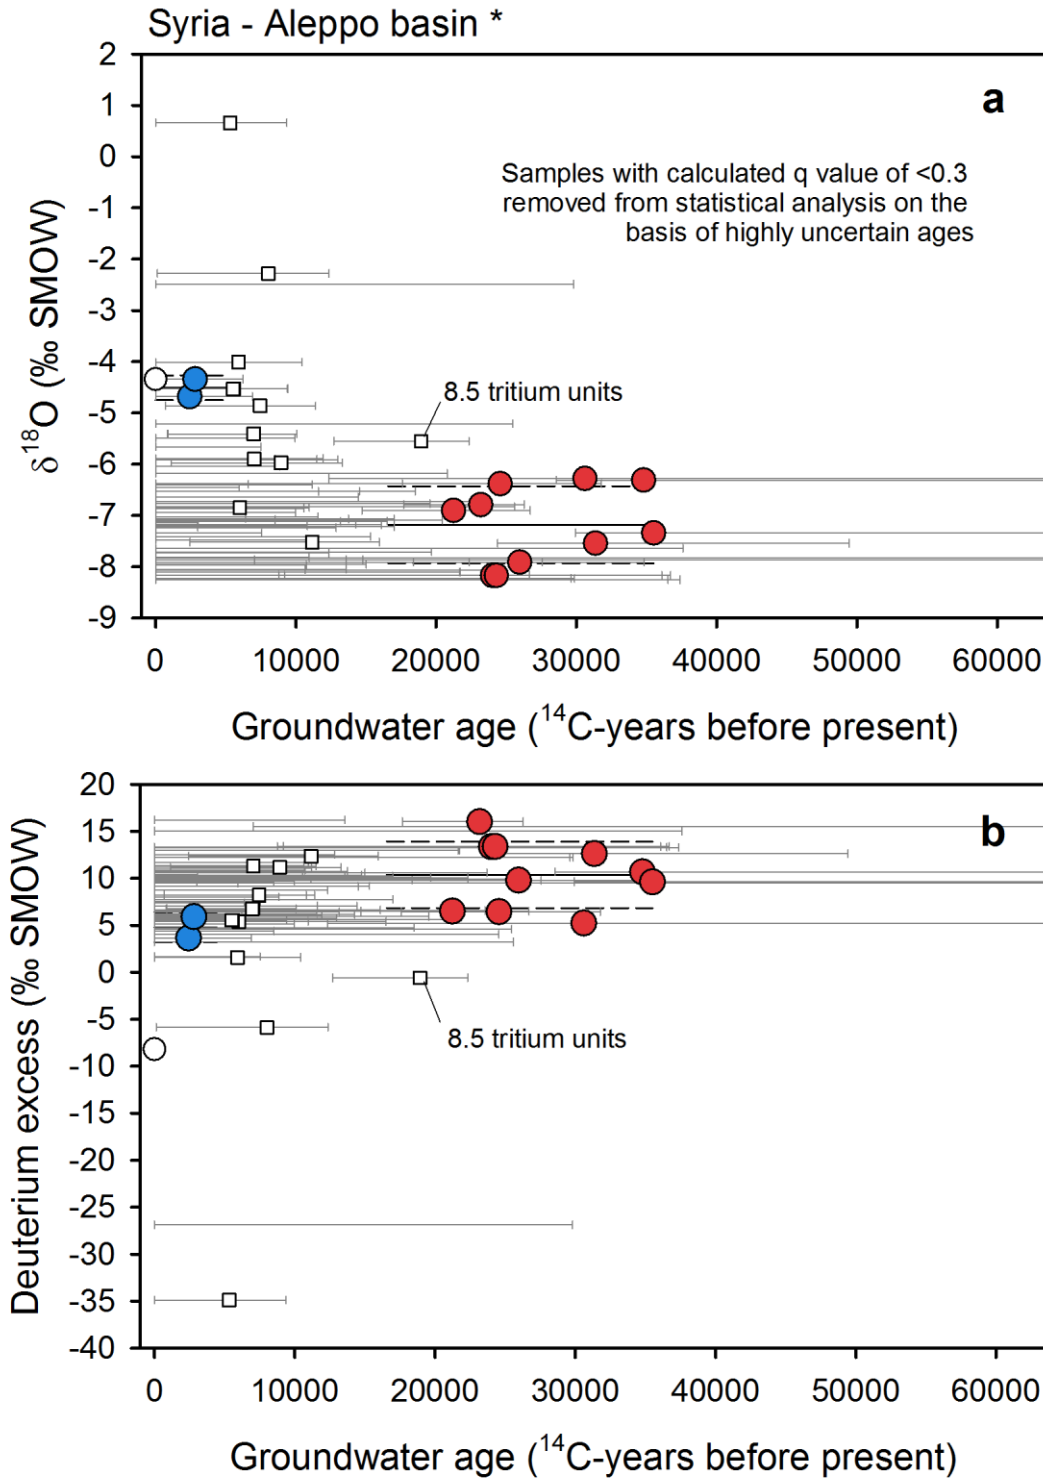

**Figure S44.** Groundwater isotope composition of the Aleppo basin. Groundwater  $\delta^{18}\text{O}$  (a) and deuterium excess (b) plotted against corrected  $^{14}\text{C}$  ages for late-Holocene (blue circles) and late-glacial (red circles) groundwaters. Lines mark the average (solid line) and one standard deviation (dashed lines) for each age group (Al-Charideh, 2012; Stadler et al., 2012).

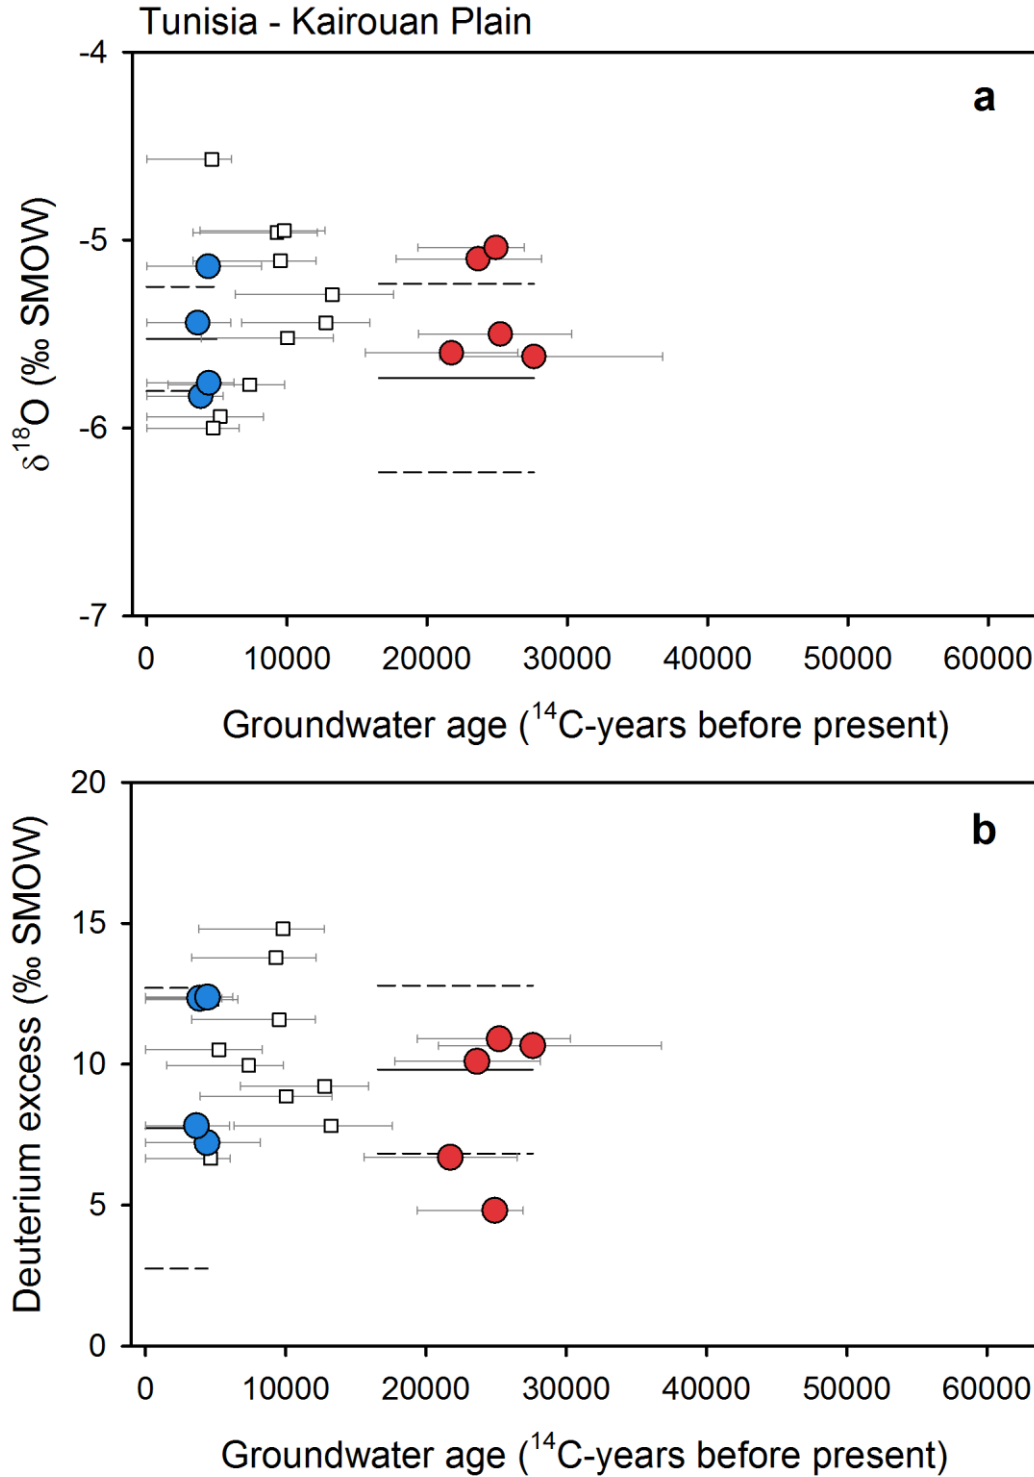

**Figure S45.** Groundwater isotope composition of the Kairouan Plain. Groundwater  $\delta^{18}\text{O}$  (a) and deuterium excess (b) plotted against corrected  $^{14}\text{C}$  ages for late-Holocene (blue circles) and late-glacial (red circles) groundwaters. Lines mark the average (solid line) and one standard deviation (dashed lines) for each age group (Derwich et al., 2012).

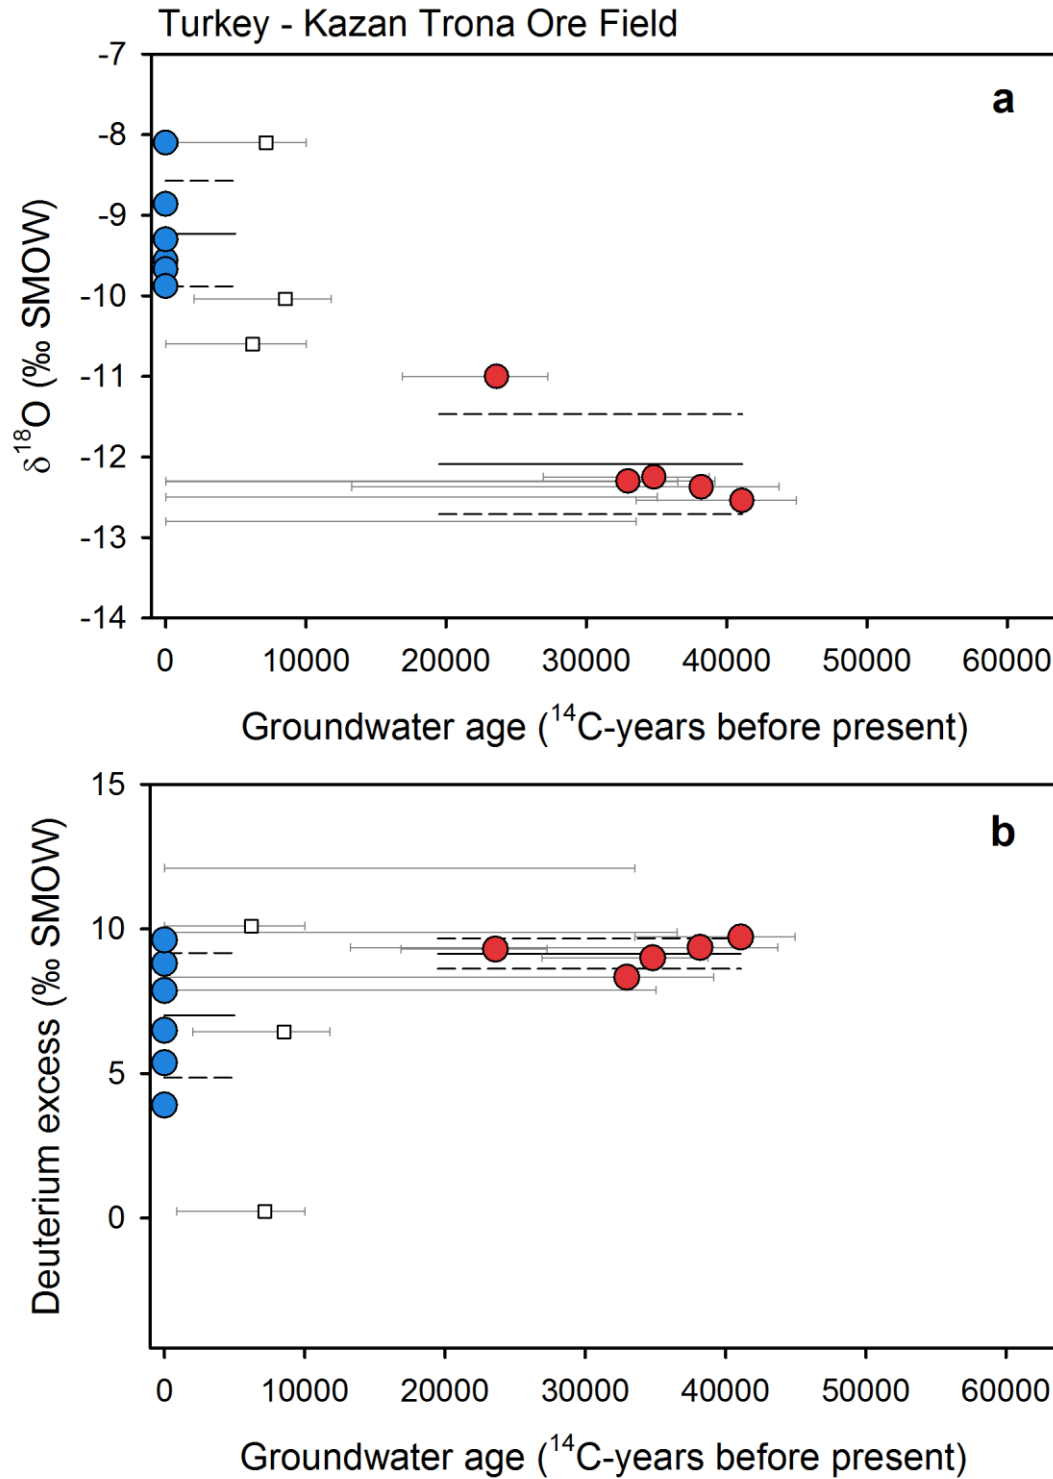

**Figure S46.** Groundwater isotope composition of the Kazan Trona ore field aquifer system. Groundwater  $\delta^{18}\text{O}$  (a) and deuterium excess (b) plotted against corrected  $^{14}\text{C}$  ages for late-Holocene (blue circles) and late-glacial (red circles) groundwaters. Lines mark the average (solid line) and one standard deviation (dashed lines) for each age group (Arslan et al., 2014).

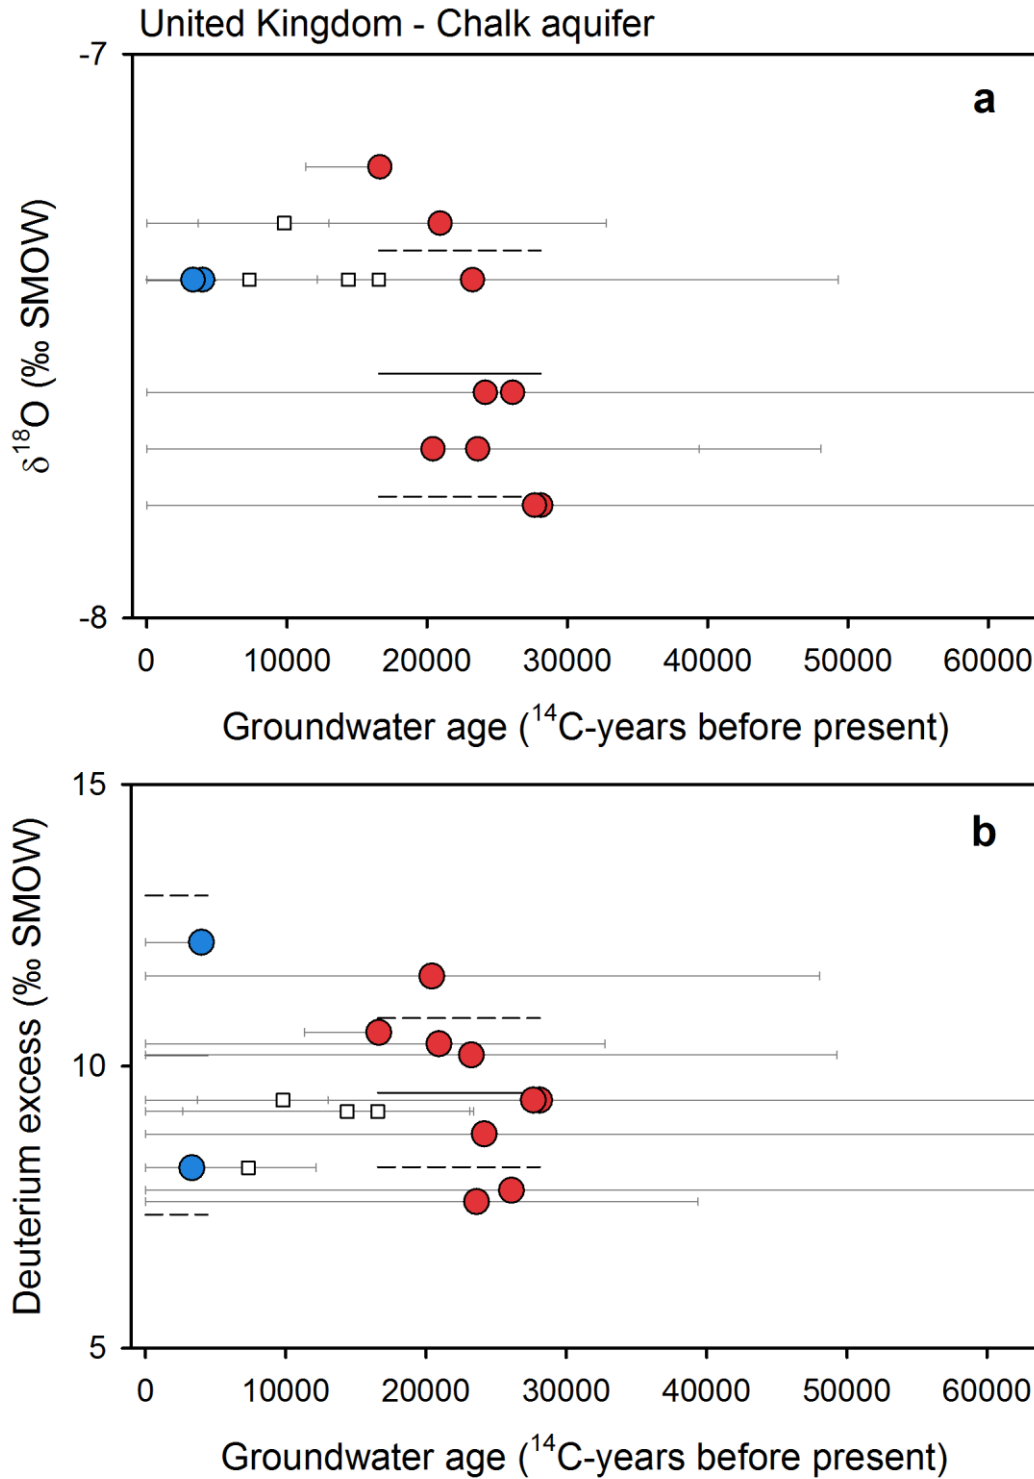

**Figure S47.** Groundwater isotope composition of the Chalk aquifer (in the United Kingdom). Groundwater  $\delta^{18}\text{O}$  (a) and deuterium excess (b) plotted against corrected  $^{14}\text{C}$  ages for late-Holocene (blue circles) and late-glacial (red circles) groundwaters. Lines mark the average (solid line) and 1 s.d. (dashed lines) for each group (Darling and Bath, 1988; Dennis et al., 1997; Elliot et al., 1999).

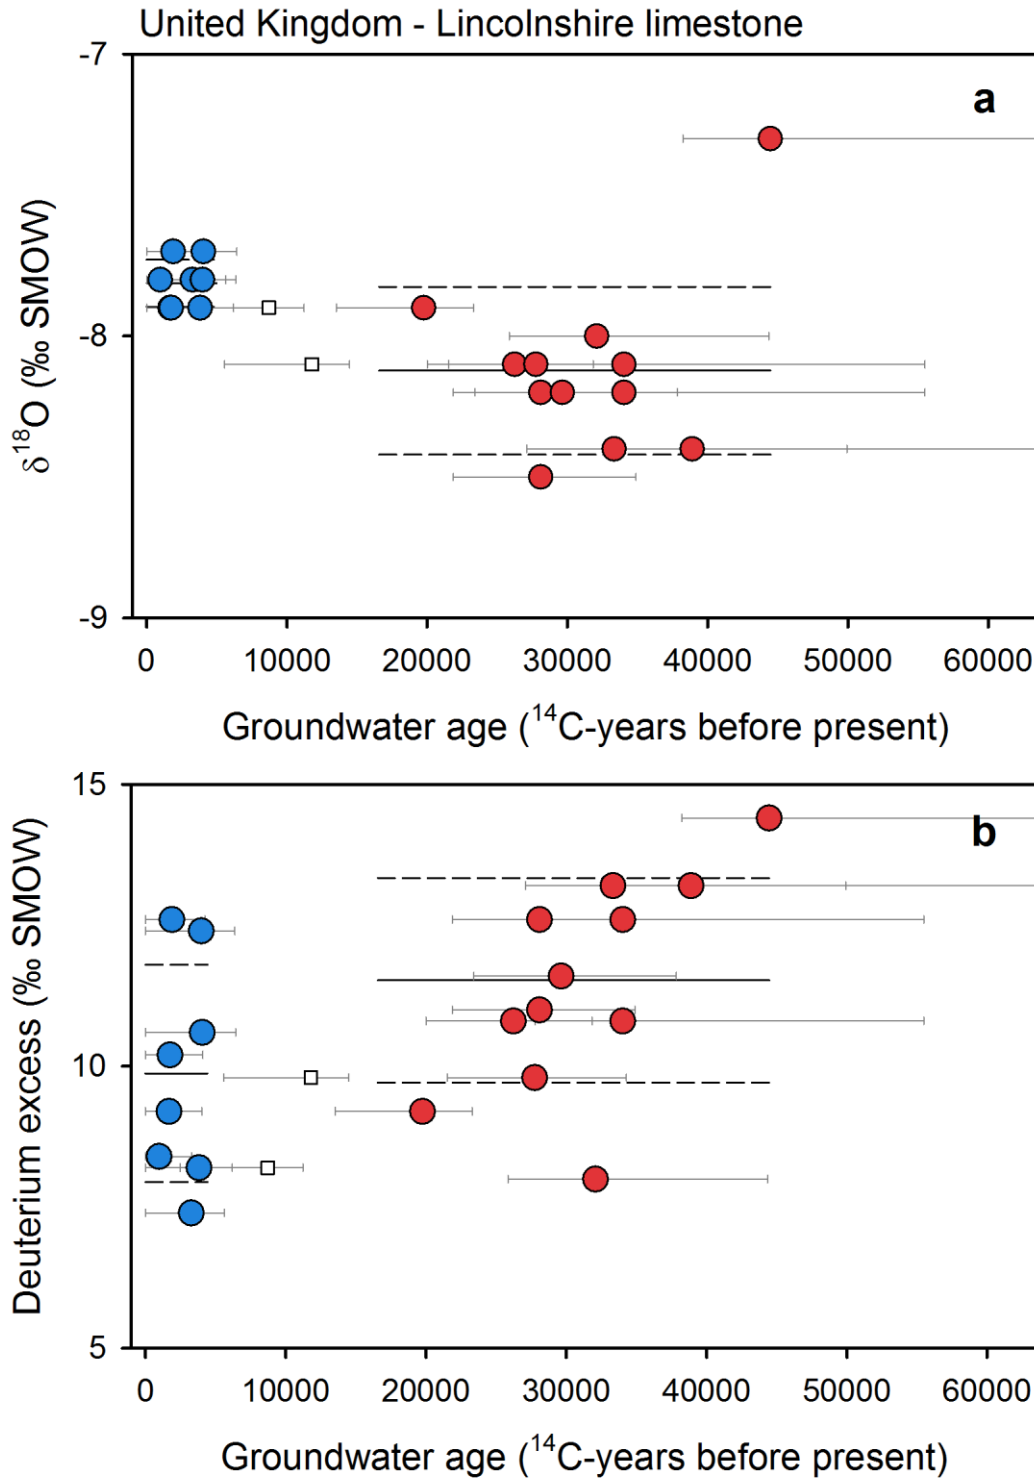

**Figure S48.** Groundwater isotope composition of the Lincolnshire limestone aquifer. Groundwater  $\delta^{18}\text{O}$  (a) and deuterium excess (b) plotted against corrected  $^{14}\text{C}$  ages for late-Holocene (blue circles) and late-glacial (red circles) groundwaters. Lines mark the average (solid line) and one standard deviation (dashed lines) for each age group (Darling et al., 1997).

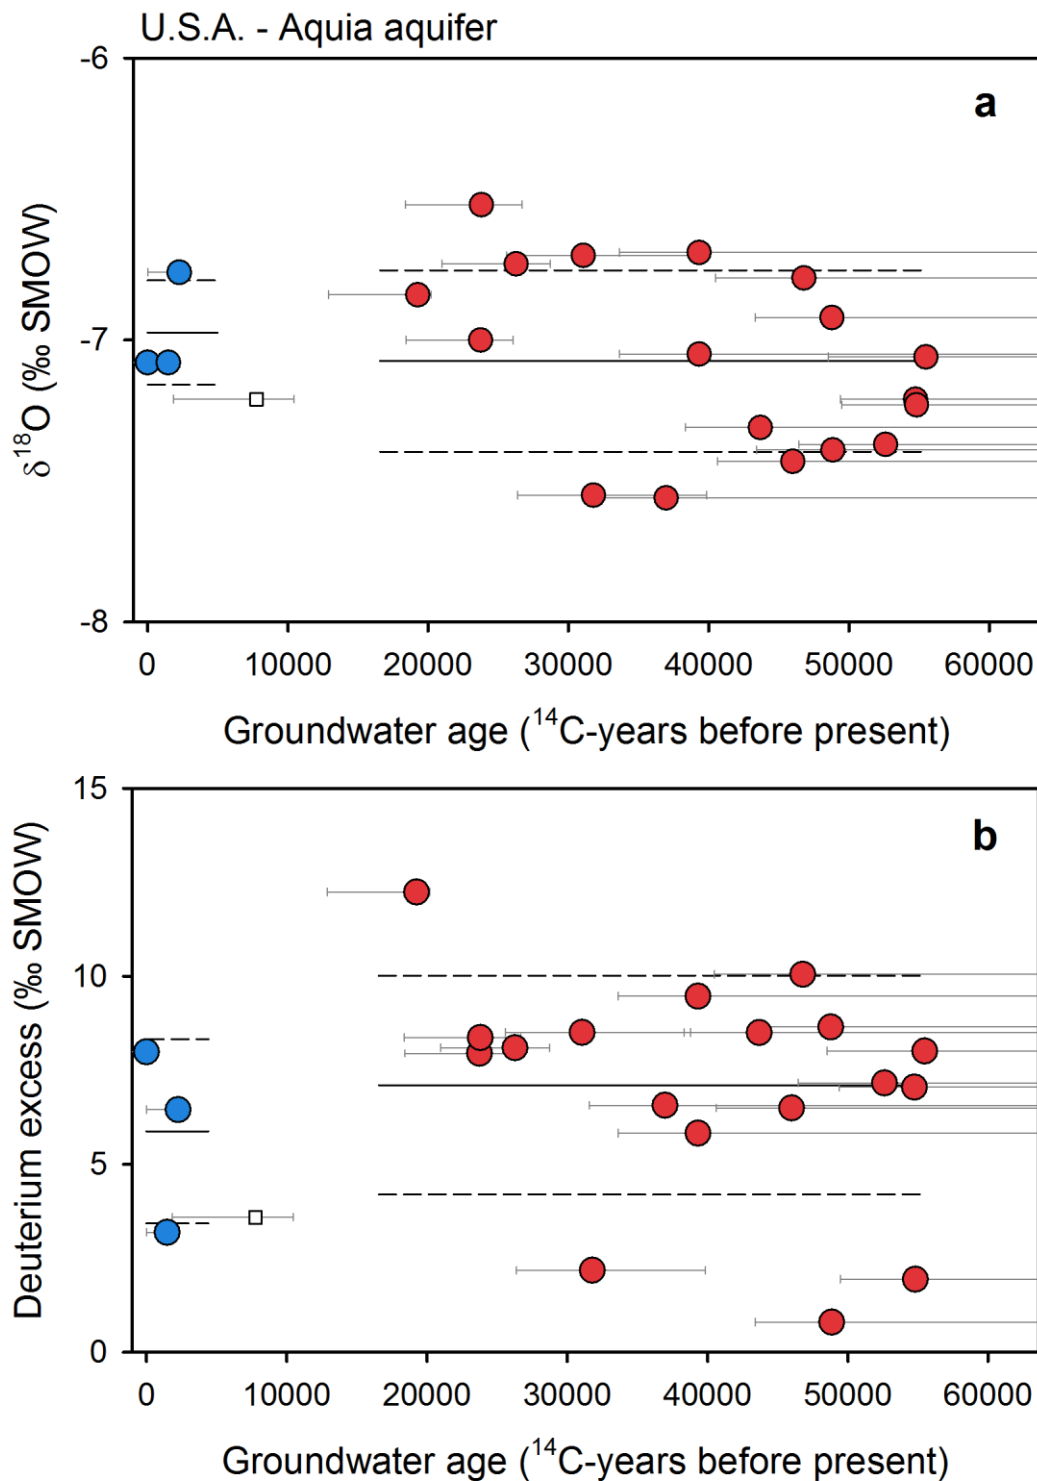

**Figure S49.** Groundwater isotope composition of the Aquia aquifer. Groundwater  $\delta^{18}\text{O}$  (a) and deuterium excess (b) plotted against corrected  $^{14}\text{C}$  ages for late-Holocene (blue circles) and late-glacial (red circles) groundwaters. Lines mark the average (solid line) and one standard deviation (dashed lines) for each age group (Aeschbach-Hertig et al., 2002).

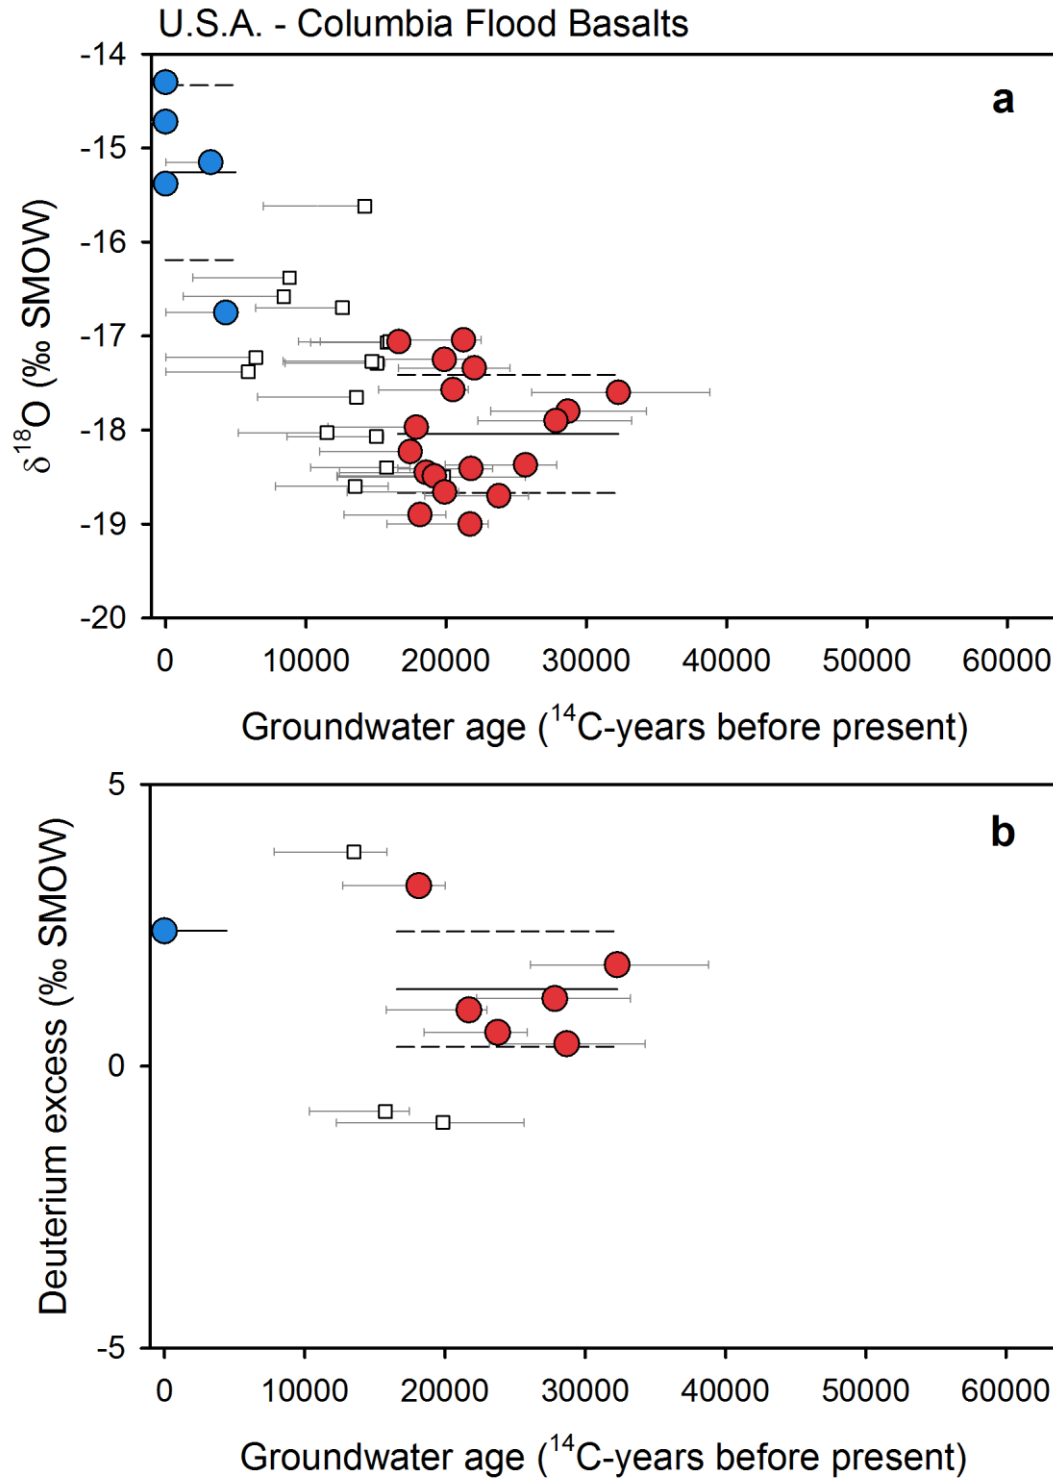

**Figure S50.** Groundwater isotope composition of groundwaters in the Columbia Flood Basalts. Groundwater  $\delta^{18}\text{O}$  (a) and deuterium excess (b) plotted against corrected  $^{14}\text{C}$  ages for late-Holocene (blue circles) and late-glacial (red circles) groundwaters. Lines mark the average (solid line) and one standard deviation (dashed lines) for each age group (Douglas et al., 2007; Brown et al., 2010).

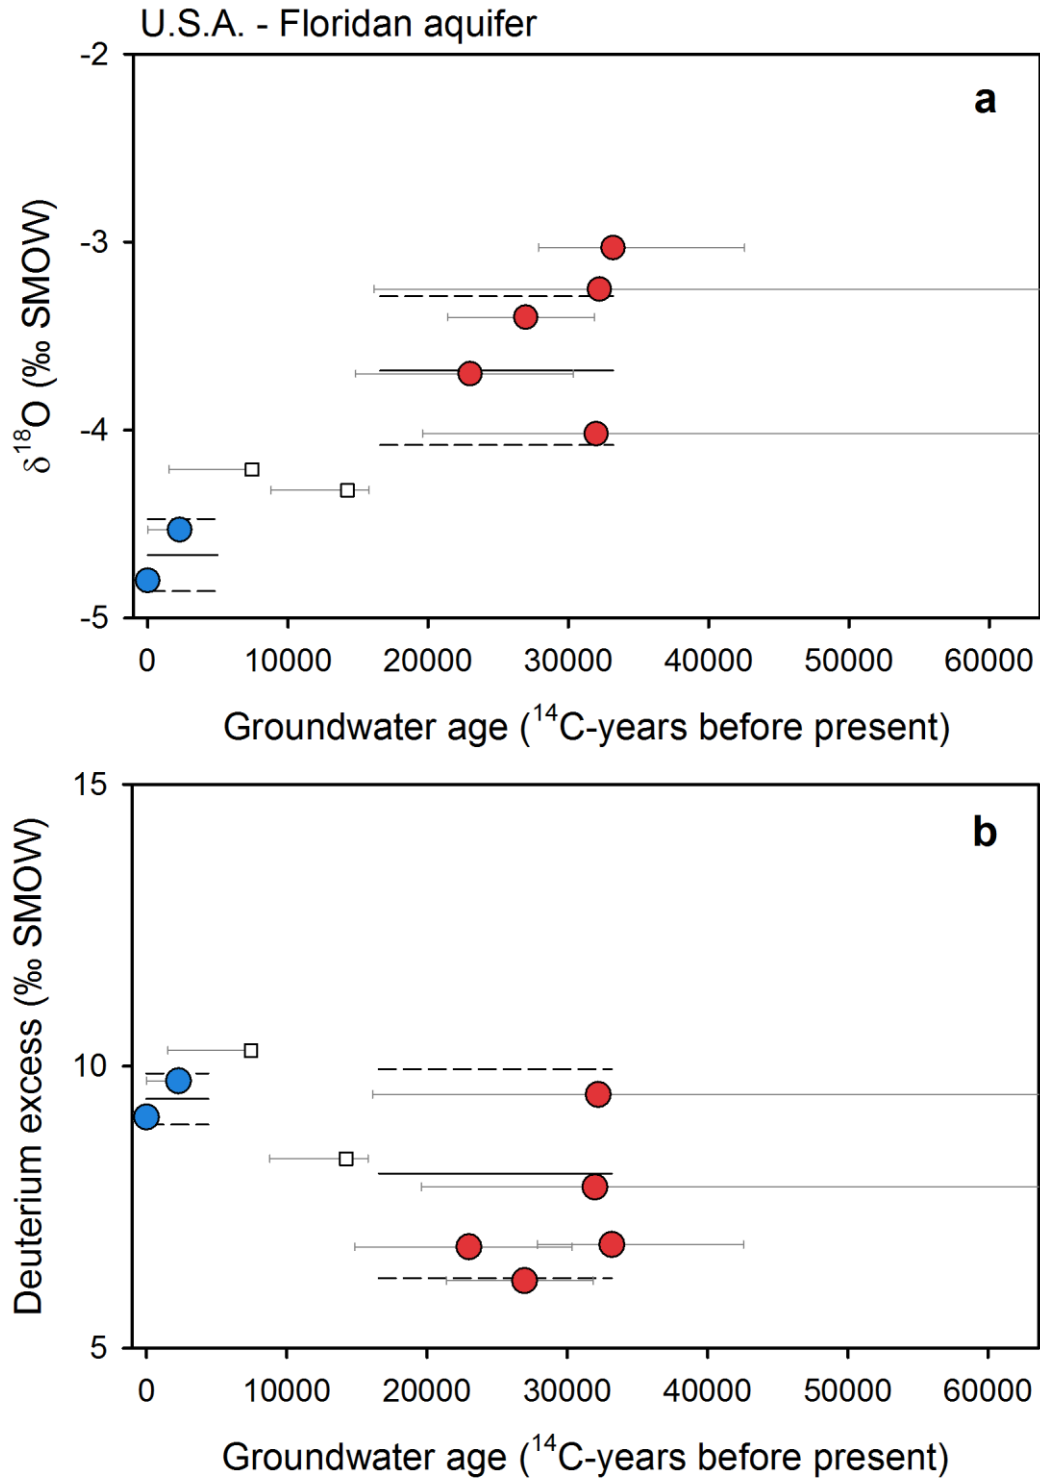

**Figure S51.** Groundwater isotope composition of the Floridan aquifer. Groundwater  $\delta^{18}\text{O}$  (a) and deuterium excess (b) plotted against corrected  $^{14}\text{C}$  ages for late-Holocene (blue circles) and late-glacial (red circles) groundwaters. Lines mark the average (solid line) and one standard deviation (dashed lines) for each age group (Clark et al., 1997).

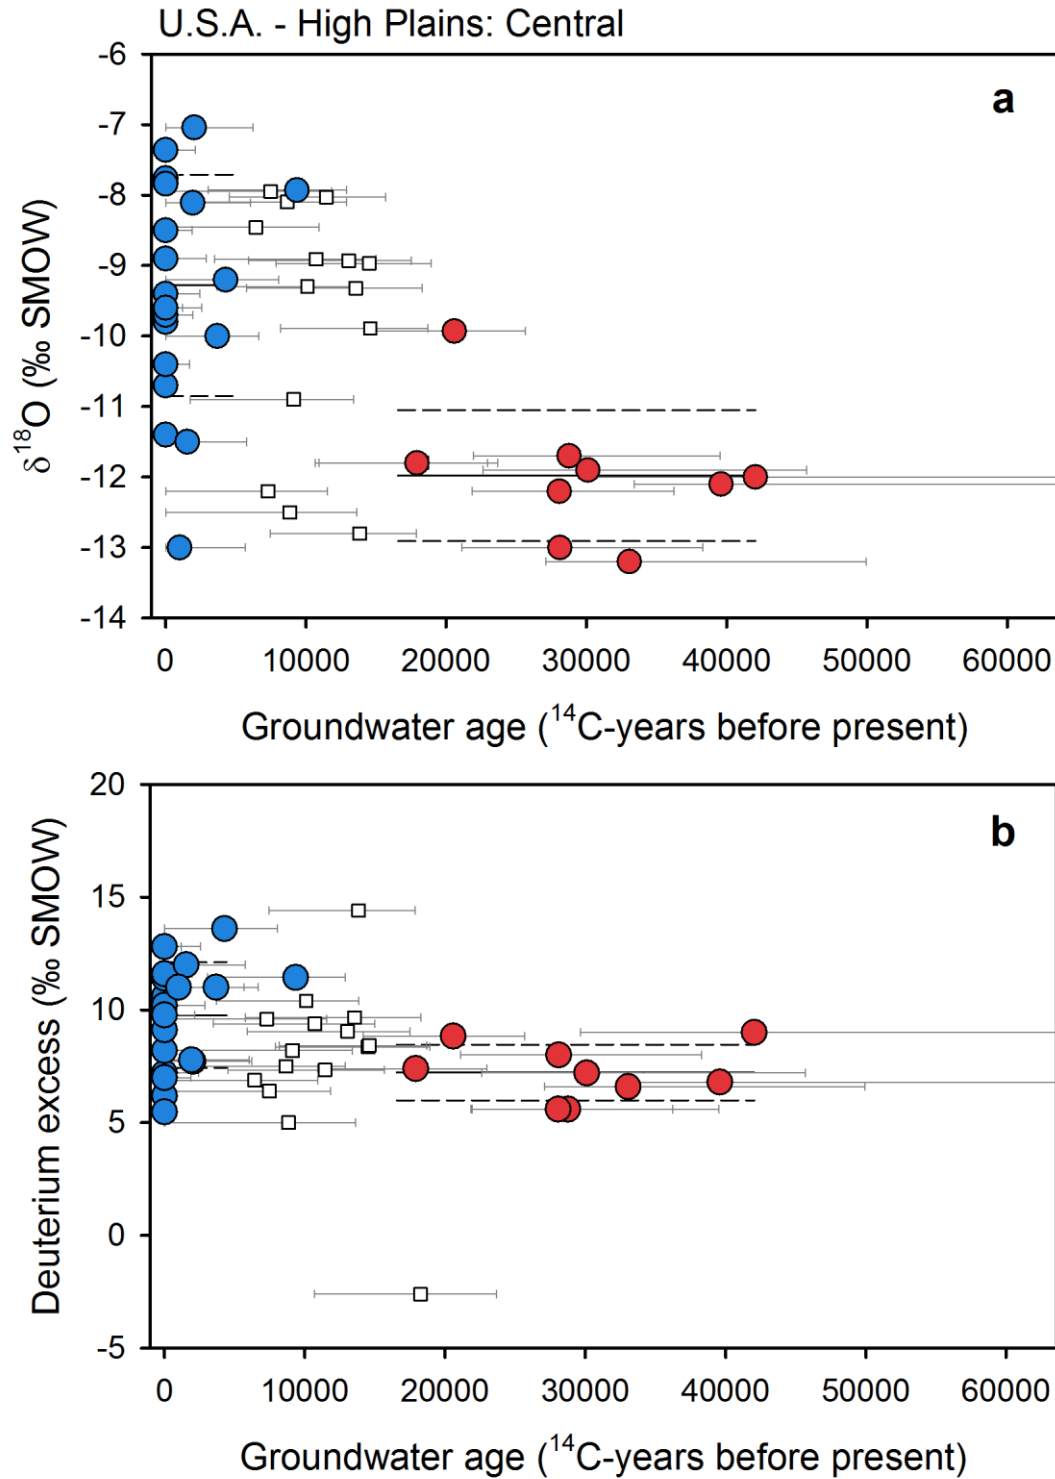

**Figure S52.** Groundwater isotope composition of the central High Plains aquifer. Groundwater  $\delta^{18}\text{O}$  (a) and deuterium excess (b) plotted against corrected  $^{14}\text{C}$  ages for late-Holocene (blue circles) and late-glacial (red circles) groundwaters. Lines mark the average (solid line) and one standard deviation (dashed lines) for each age group (Dutton, 1995; Clark et al. 1998).

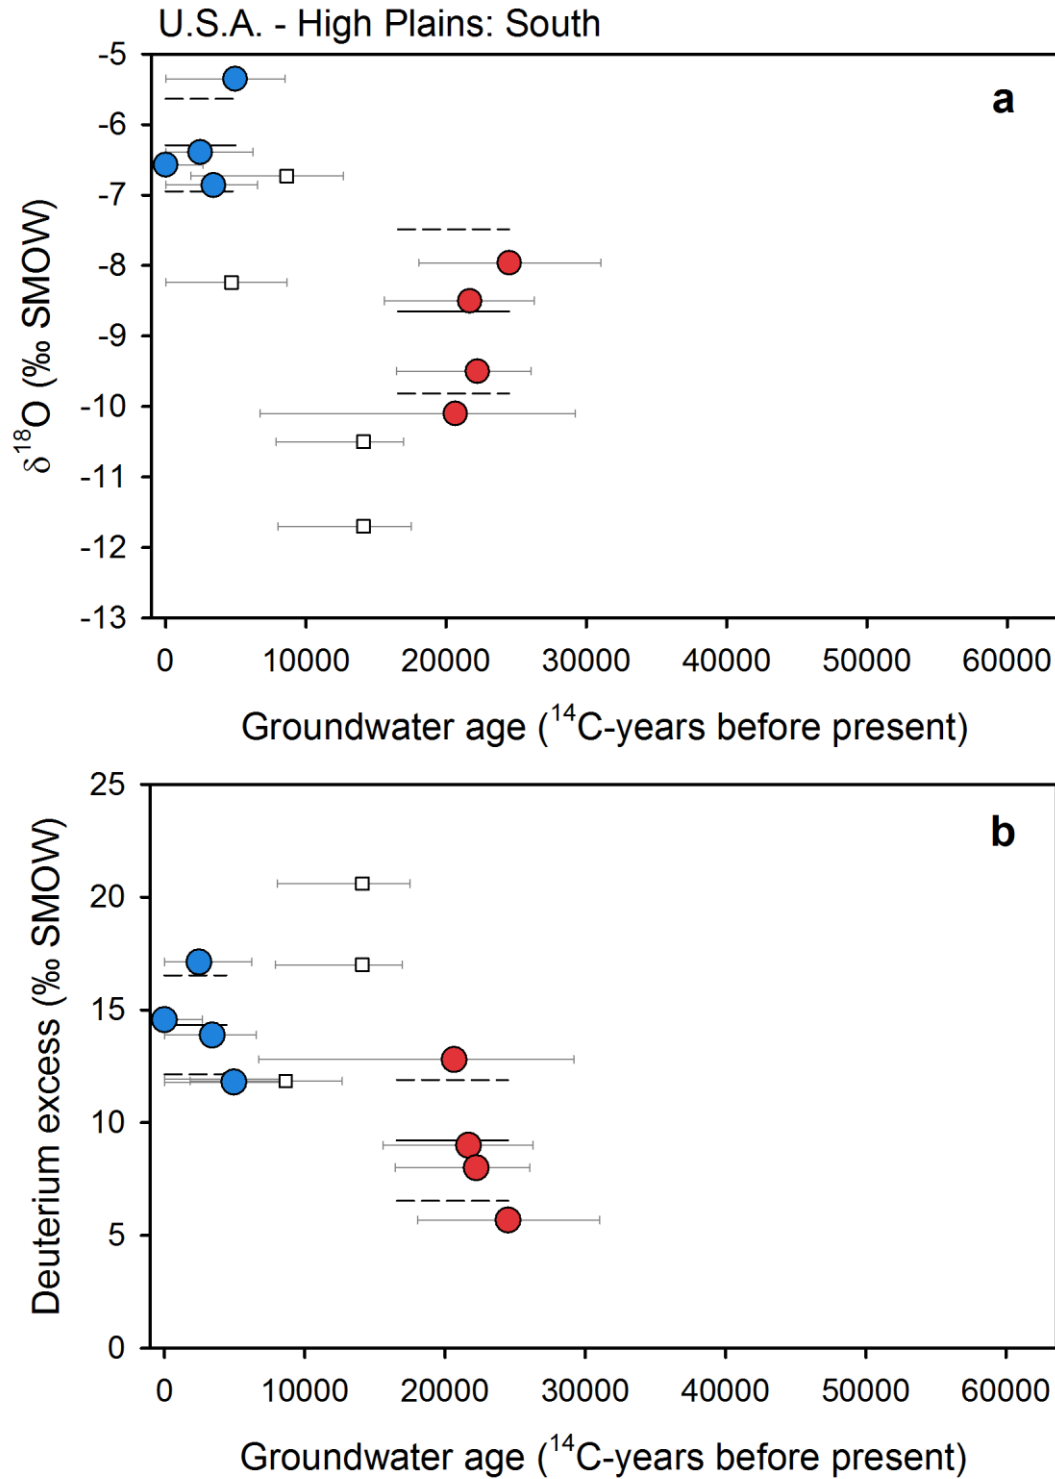

**Figure S53.** Groundwater isotope composition of the southern High Plains aquifer. Groundwater  $\delta^{18}\text{O}$  (a) and deuterium excess (b) plotted against corrected  $^{14}\text{C}$  ages for late-Holocene (blue circles) and late-glacial (red circles) groundwaters. Lines mark the average (solid line) and one standard deviation (dashed lines) for each age group (Dutton, 1995; Mehta et al., 2000).

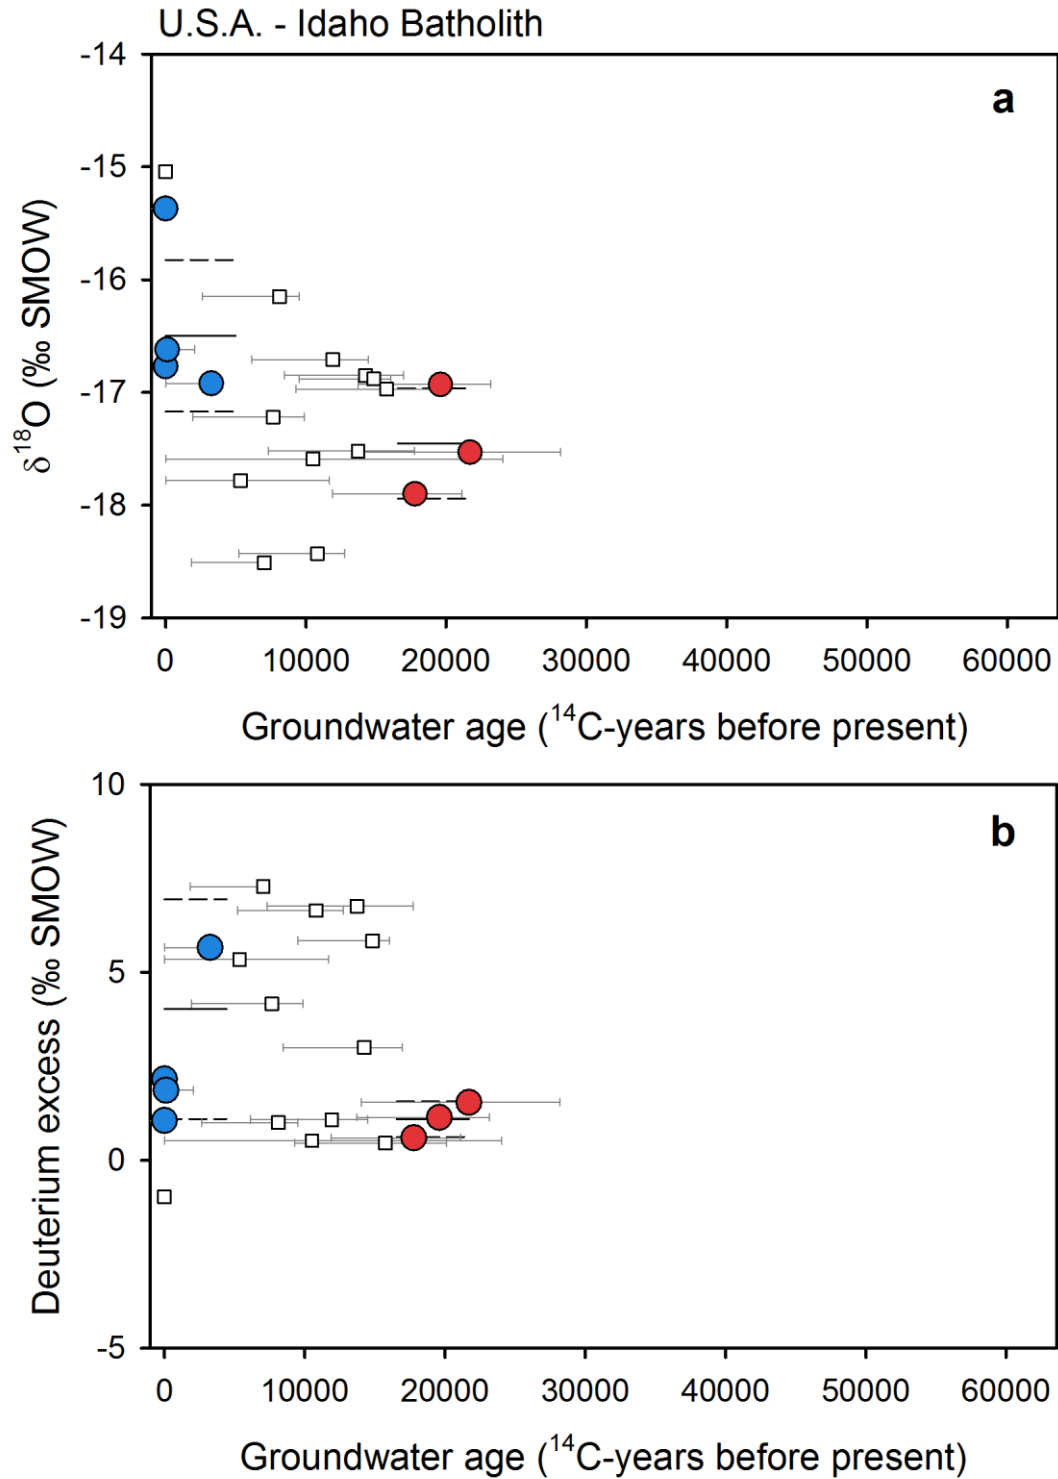

**Figure S54.** Groundwater isotope composition of the Idaho Batholith aquifer. Groundwater  $\delta^{18}\text{O}$  (a) and deuterium excess (b) plotted against corrected  $^{14}\text{C}$  ages for late-Holocene (blue circles) and late-glacial (red circles) groundwaters. Lines mark the average (solid line) and one standard deviation (dashed lines) for each age group (Schlegel et al., 2009).

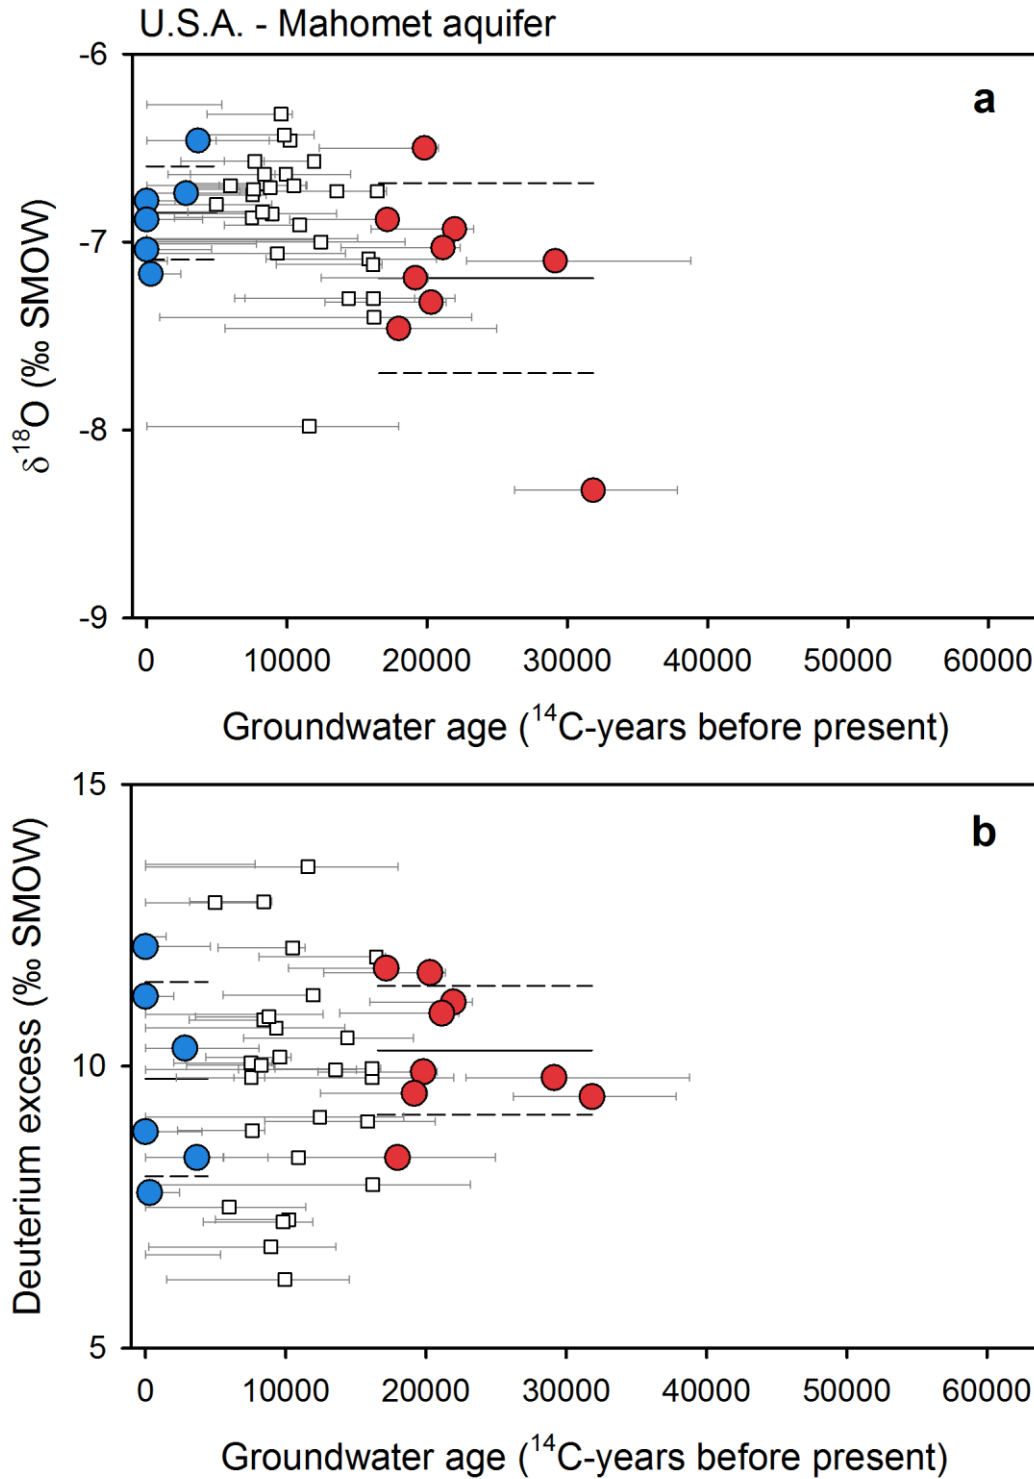

**Figure S55.** Groundwater isotope composition of the Mahomet aquifer. Groundwater  $\delta^{18}\text{O}$  (a) and deuterium excess (b) plotted against corrected  $^{14}\text{C}$  ages for late-Holocene (blue circles) and late-glacial (red circles) groundwaters. Lines mark the average (solid line) and one standard deviation (dashed lines) for each age group (Hackley et al., 2010).

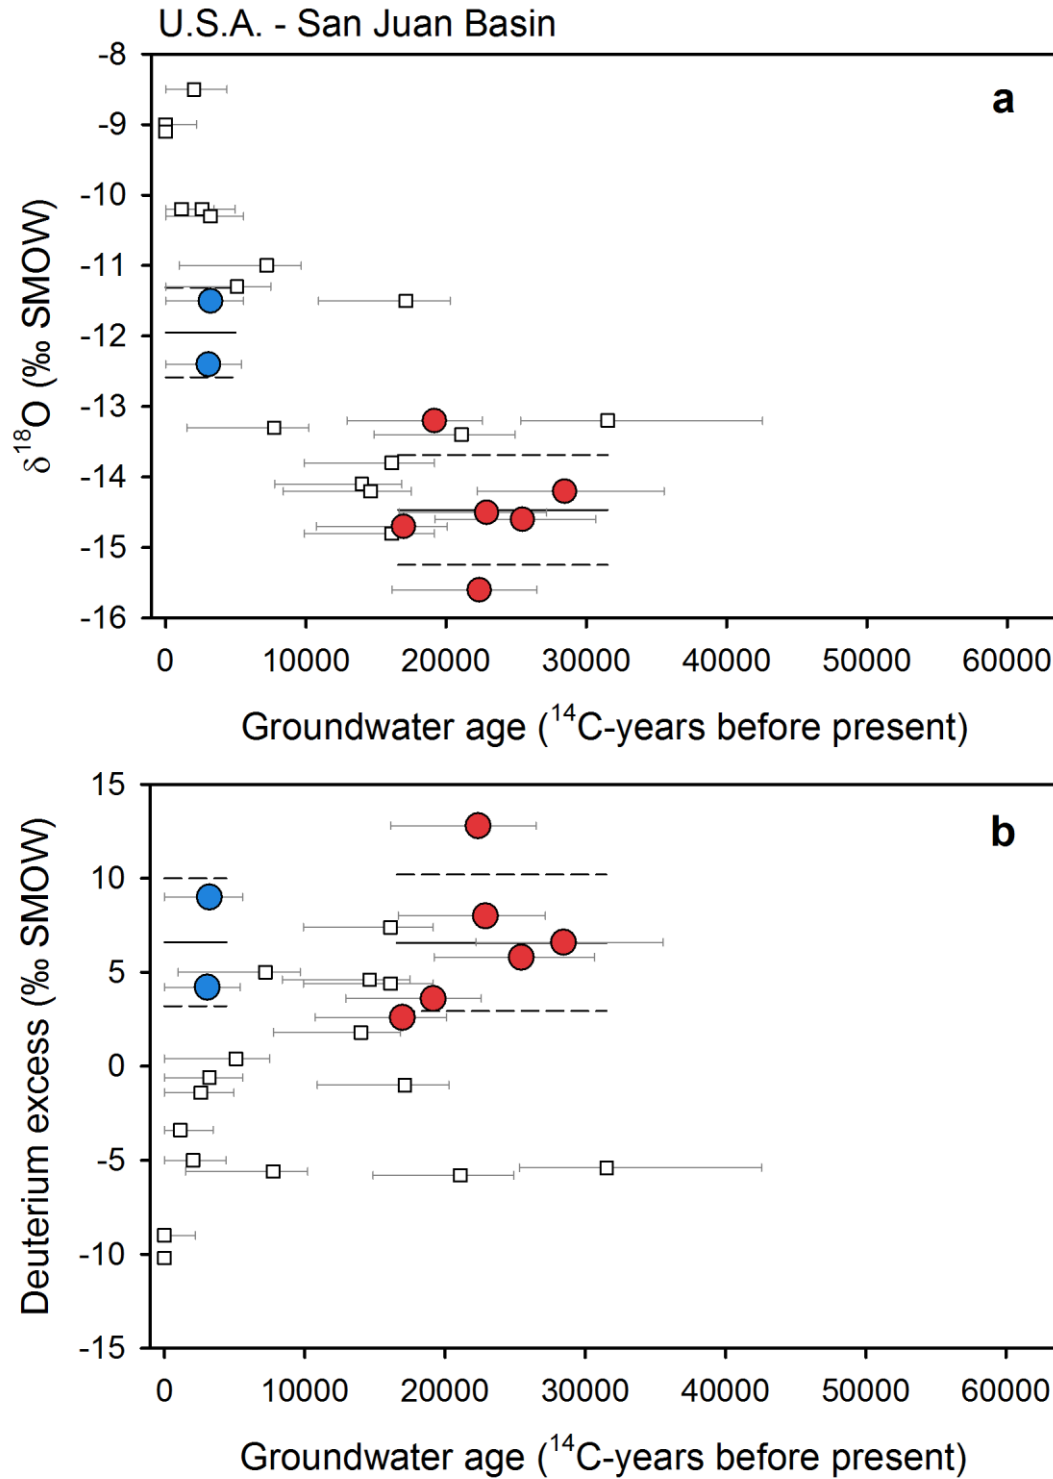

**Figure S56.** Groundwater isotope composition of the San Juan basin. Groundwater  $\delta^{18}\text{O}$  (a) and deuterium excess (b) plotted against corrected  $^{14}\text{C}$  ages for late-Holocene (blue circles) and late-glacial (red circles) groundwaters. Lines mark the average (solid line) and one standard deviation (dashed lines) for each age group (Phillips et al., 1986).

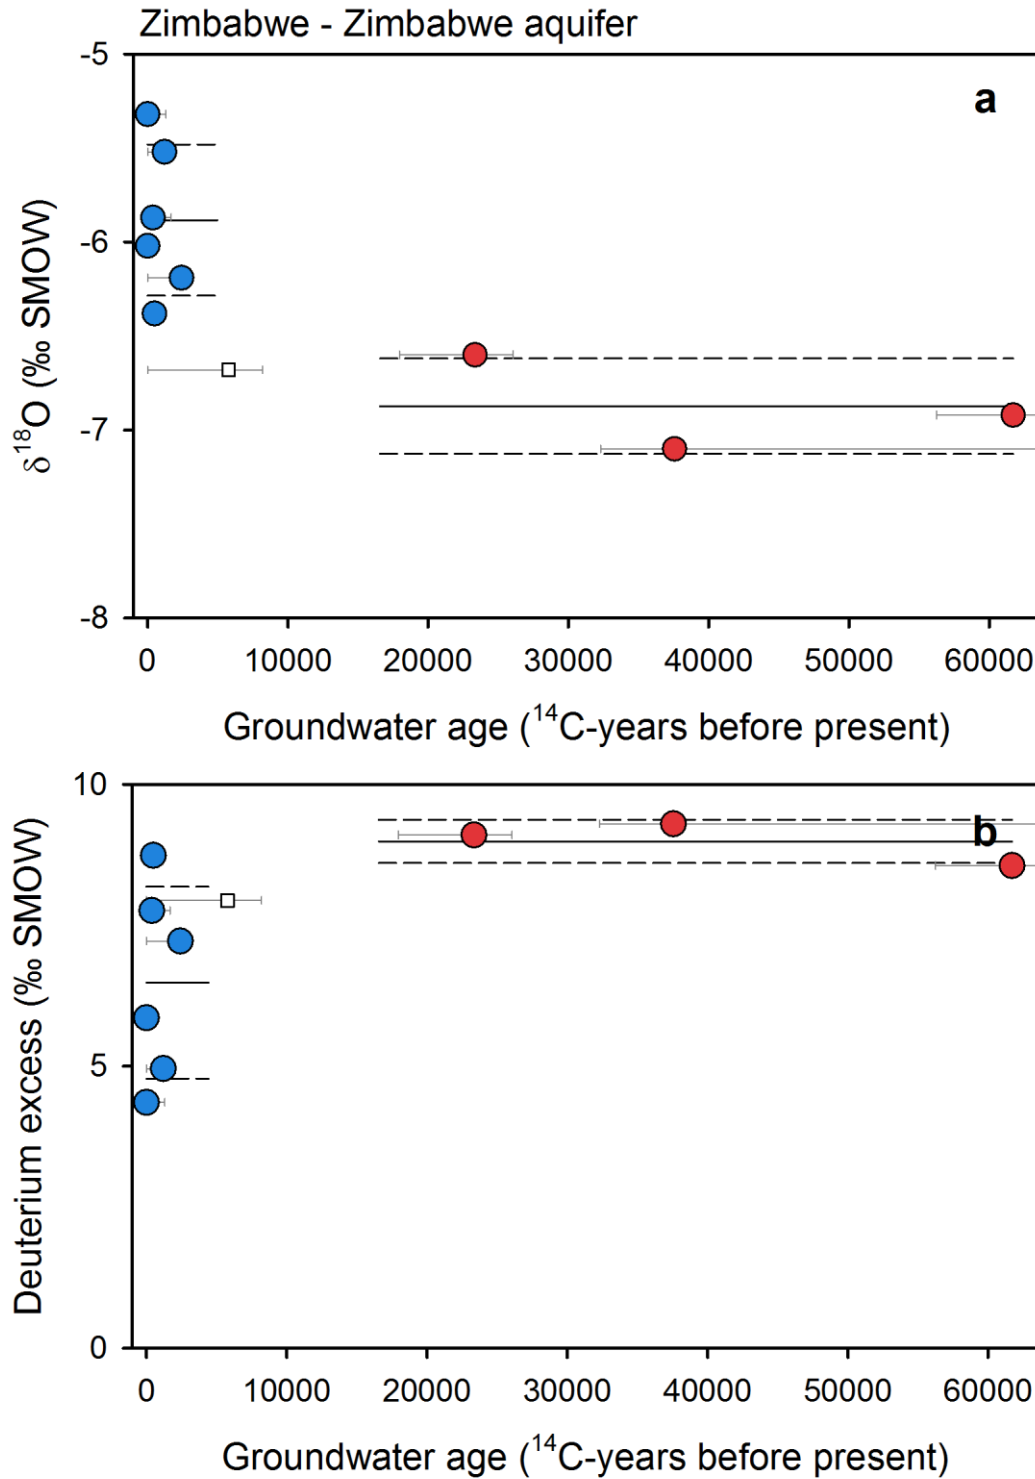

**Figure S57.** Groundwater isotope composition of the Zimbabwe aquifer. Groundwater  $\delta^{18}\text{O}$  (a) and deuterium excess (b) plotted against corrected  $^{14}\text{C}$  ages for late-Holocene (blue circles) and late-glacial (red circles) groundwaters. Lines mark the average (solid line) and one standard deviation (dashed lines) for each age group (Larsen et al., 2002).

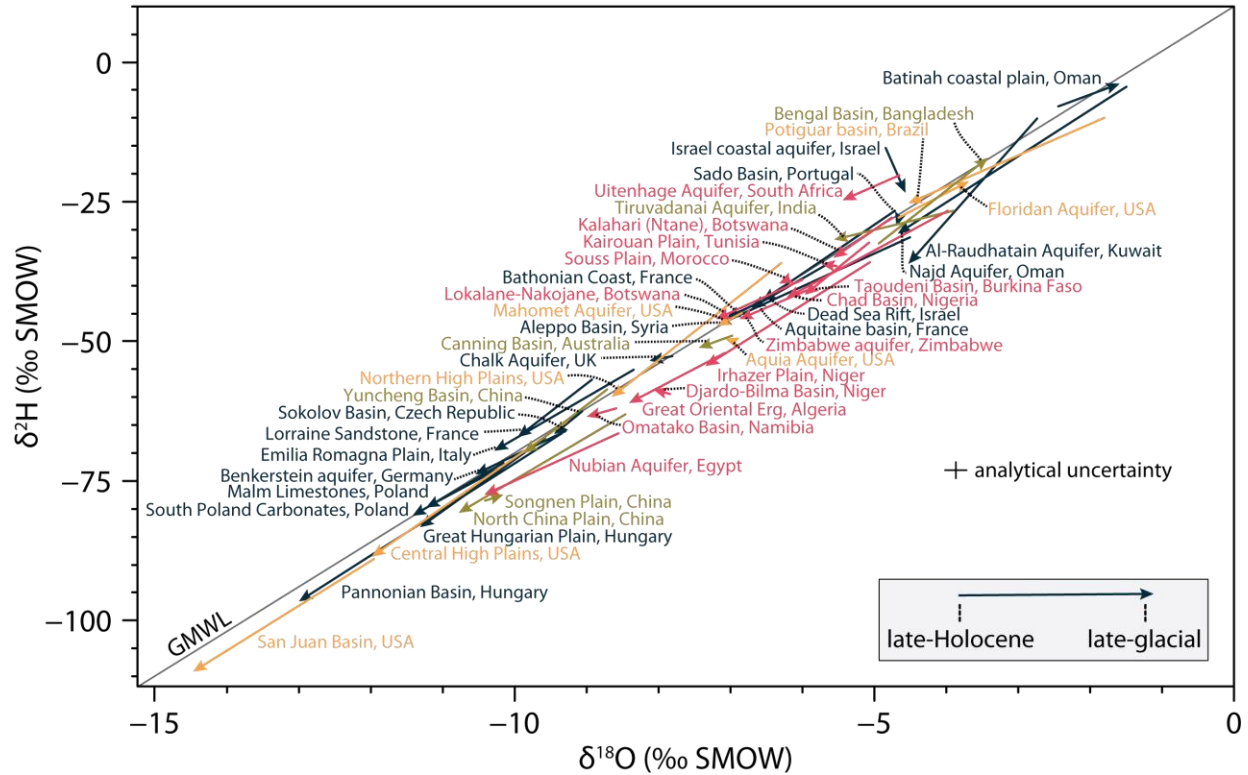

**Figure S58.**  $\delta^{18}\text{O}$  and  $\delta^2\text{H}$  values of late-glacial and late-Holocene groundwaters. Each arrow represents one aquifer, the arrow marks the average late-Holocene isotope composition (start of the arrow) and the average late-glacial isotope composition (end of the arrow). Each arrow is labelled (short dashed black lines). Aquifers are color coded by region: Asia, Australia and Oceania (green), Africa (red), North and South America (yellow) and Europe and the Middle East (dark blue). The global meteoric water line is shown as a dark black line (Craig, 1961). Groundwater data shown here was compiled from publications cited in Table S2.

## References: Supplementary Information text

- Annan, J. D., and Hargreaves, J. C. (2013), A new global reconstruction of temperature changes at the Last Glacial Maximum. *Climate of the Past*, **9**, 367–376.
- Bouchaou, L., Michelot, J. L., Vengosh, A., Hsissou, Y., Qurtobi, M., Gaye, C. B., Bullen, T. D., and Zuppi, G. M. (2008), Application of multiple isotopic and geochemical tracers for investigation of recharge, salinization, and residence time of water in the Souss–Massa aquifer, southwest of Morocco, *Journal of Hydrology*, **352**, 267–287.
- Burchuladze, A. A., Chudy, M., Eristavi, I. V., Pagava, S. V., Povinec, P., Sivo, A., and Togonidze, G. I. (1989), Anthropogenic  $^{14}\text{C}$  variations in atmospheric  $\text{CO}_2$  and wines, *Radiocarbon*, **31**, 771–776.
- Clark, I. D., and Fritz, P. (1997), Environmental isotopes in hydrogeology. CRC press.
- Craig, H. (1961), Isotopic variations in meteoric waters, *Science*, **133**, 1702–1703.
- Ferguson, G. A., Betcher, R. N., and Grasby, S. E. (2007), Hydrogeology of the Winnipeg formation in Manitoba, Canada, *Hydrogeology Journal*, **15**, 573–587.
- Geyh, M. A., and Söfner, B. (1989), Groundwater analysis of environmental carbon and other isotopes from the Jakarta Basin Aquifer, Indonesia, *Radiocarbon*, **31**, 919–925.
- Grasby, S. E., and Chen, Z. (2005), Subglacial recharge into the Western Canada Sedimentary Basin—Impact of Pleistocene glaciation on basin hydrodynamics, *Geological Society of America Bulletin*, **117**, 500–514.
- Karro, E., Marandi, A., and Vaikmäe, R. (2004), The origin of increased salinity in the Cambrian-Vendian aquifer system on the Kopli Peninsula, northern Estonia, *Hydrogeology Journal*, **12**, 424–435.
- Lisiecki, L. E., and Raymo, M. E. (2005), A Pliocene-Pleistocene stack of 57 globally distributed benthic  $\delta^{18}\text{O}$  records, *Paleoceanography*, **20**, PA1003.

- Marcott, S. A., Shakun, J. D., Clark, P. U., and Mix, A. C. (2013), A reconstruction of regional and global temperature for the past 11,300 years, *Science* **339**, 1198–1201.
- McIntosh, J. C., Schlegel, M. E., and Person, M. (2012), Glacial impacts on hydrologic processes in sedimentary basins: evidence from natural tracer studies, *Geofluids*, **12**, 7–12.
- New, M., Lister, D., Hulme, M., and Makin, I. (2002), A high-resolution data set of surface climate over global land areas, *Climate Research*, **21**, 1–25.
- O'Neil, J. R., Clayton, R. N., and Mayeda, T. K. (1969), Oxygen isotope fractionation in divalent metal carbonates, *The Journal of Chemical Physics*, **51**, 5547–5558.
- Reimer, P. J. et al. (2013), IntCal13 and Marine13 radiocarbon age calibration curves 0–50,000 years cal BP, *Radiocarbon*, **55**, 1869–1887.
- Stotler, R. L., Frape, S. K., Ruskeeniemi, T., Pitkänen, P., and Blowes, D. W. (2012), The interglacial–glacial cycle and geochemical evolution of Canadian and Fennoscandian Shield groundwaters, *Geochimica et Cosmochimica Acta*, **76**, 45–67.
- Veizer, J., et al. (1999).  $^{87}\text{Sr}/^{86}\text{Sr}$ ,  $\delta^{13}\text{C}$  and  $\delta^{18}\text{O}$  evolution of Phanerozoic seawater. *Chemical Geology*, **161**, 59–88.

#### **References: General circulation models – additional references in Table S1**

- Argus, D. F., and Peltier, W. R. (2010), Constraining models of postglacial rebound using space geodesy: a detailed assessment of model ICE-5G (VM2) and its relatives, *Geophysical Journal International* **181**, 697–723.
- Braconnot, P. et al. (2012), Evaluation of climate models using palaeoclimatic data. *Nature Climate Change*, **2**, 417–424.
- Collins, W. D. et al. (2006), The formulation and atmospheric simulation of the Community Atmosphere Model version 3 (CAM3), *Journal Of Climate*, **19**, 2144–2161.
- Hansen, J., et al. (2005), Earth's energy imbalance: Confirmation and implications, *Science*, **308**, 1431–1435.

476 Hourdin, F., et al. (2006), The LMDZ4 general circulation model: Climate performance and  
 477 sensitivity to parametrized physics with emphasis on tropical convection, *Climate Dynamics*,  
 478 **27**, 787–813.

479 Kanamitsu, M., et al. (2002), NCEP dynamical seasonal forecast system 2000, *Bulletin of the*  
 480 *American Meteorological Society*, **83**, 1019–1037.

481 Koch, D., et al. (2011), Coupled Aerosol-Chemistry–Climate Twentieth-Century Transient  
 482 Model Investigation: Trends in Short-Lived Species and Climate Responses, *Journal of*  
 483 *Climate*, **24**, 2693–2714.

484 LeGrande, A. N., and Schmidt, G. A. (2009), Sources of Holocene variability of oxygen  
 485 isotopes in paleoclimate archives, *Climate of the Past*, **5**, 441–455.

486 Licciardi, J. M., Clark, P. U., Jenson, J. W., and Macayeal, D. R. (1999), Deglaciation of a  
 487 soft-bedded Laurentide Ice Sheet, *Quaternary Science Reviews*, **17**, 427–448.

488 Noone, D., and Sturm, C. (2010), Comprehensive dynamical models of global and regional  
 489 water isotope distributions. In: *Isoscapes: Understanding Movement, Pattern, and Process on*  
 490 *Earth through Isotope Mapping*, Springer, pp. 195–219

491 Otto-Bliesner, B. L. et al. (2006), Last Glacial Maximum and Holocene climate in CCSM3,  
 492 *Journal of Climate*, **19**, 2526–2544.

493 Peltier, W. R. (1994), Ice age paleotopography, *Science*, **265**, 195–201.

494 Roeckner, E., Brokopf, R., Esch, M., Giorgetta, M., Hagemann, S., Kornblueh, L., Manzini,  
 495 E., Schlese, U., and Schulzweida, U. (2006), Sensitivity of simulated climate to horizontal  
 496 and vertical resolution in the ECHAM5 atmosphere model, *Journal Of Climate*, **19**, 3771–  
 497 3791.

498 Schmidt, G. A., et al. (2014), Configuration and assessment of the GISS ModelE2  
 499 contributions to the CMIP5 archive, *Journal of Advances in Modeling Earth Systems*, **6**,  
 500 141–184.

501 Shindell, D. T., Faluvegi, G., Miller, R. L., Schmidt, G. A., Hansen, J. E., and Sun, S. (2006),  
 502 Solar and anthropogenic forcing of tropical hydrology, *Geophysical Research Letters*, **33**,  
 503 L24706.

504 Sturm, C., Zhang, Q. and Noone, D. (2010), An introduction to stable water isotopes in  
 505 climate models: benefits of forward proxy modelling for paleoclimatology, *Climate of the*  
 506 *Past*, **6**, 115–129.

507 Toscano, M. A., Peltier, W. R., and Drummond, R. (2011), ICE-5G and ICE-6G models of  
 508 postglacial relative sea-level history applied to the Holocene coral reef record of northeastern

- 509 St Croix, USVI: investigating the influence of rotational feedback on GIA processes at  
510 tropical latitudes, *Quaternary Science Reviews*, **30**, 3032–3042.
- 511 Ullman, D. J., LeGrande, A. N., Carlson, A. E., Anslow, F. S., and Licciardi, J. M. (2013),  
512 Assessing the impact of Laurentide Ice-Sheet topography on glacial climate, *Climate of the*  
513 *Past*, **10**, 487–507
- 514 Werner M., Langebroek, P. M., Carlsen T., Herold M., and Lohmann G., (2011), Stable  
515 water isotopes in the ECHAM5 general circulation model: Toward high-resolution isotope  
516 modeling on a global scale, *Journal of Geophysical Research*, **116**, D15109.
- 517 Yoshimura, K., Kanamitsu, M., Noone, D., and Oki, T. (2008), Historical isotope simulation  
518 using Reanalysis atmospheric data, *Journal of Geophysical Research*, **113**, D19108.
- 519 **References: Groundwater data**
- 520 Aeschbach-Hertig, W., Stute, M., Clark, J. F., Reuter, R. F., and Schlosser, P. (2002), A  
521 paleotemperature record derived from dissolved noble gases in groundwater of the Aquia  
522 Aquifer (Maryland, USA). *Geochimica et Cosmochimica Acta*, **66**, 797–817.
- 523 Aggarwal, P. K. et al. (2000), A report on isotope hydrology of groundwater in Bangladesh:  
524 implications for characterization and mitigation of arsenic in groundwater, International  
525 Atomic Energy Agency, Department of Technical Co-operation, Vienna (Austria).
- 526 Al-Charideh, A. (2012), Geochemical and isotopic characterization of groundwater from  
527 shallow and deep limestone aquifers system of Aleppo basin (north Syria), *Environmental*  
528 *Earth Sciences*, **65**, 1157–1168.
- 529 Al-Mashaikhi, K., Oswald, S., Attinger, S., Büchel, G., Knöller, K., and Strauch, G. (2012),  
530 Evaluation of groundwater dynamics and quality in the Najd aquifers located in the Sultanate  
531 of Oman, *Environmental Earth Sciences*, **66**, 1195–1211.
- 532 Al-Ruwaih, F. M., and Shehata, M. (2004), Hydrochemical processes and environmental  
533 isotopic study of groundwater in Kuwait, *Water International*, **29**, 158–166.

Andrews, J. N., Fontes, J. C., Aranyossy, J. F., Dodo, A., Edmunds, W. M., Joseph, A., and Travi, Y. (1994), The evolution of alkaline groundwaters in the continental intercalaire aquifer of the Irhazer Plain, Niger, *Water Resources Research*, **30**, 45–61.

Arslan, S., Yazicigil, H., Stute, M., Schlosser, P. (2014), Environmental isotopes and noble gases in the deep aquifer system of Kazan Trona Ore Field, central Turkey and links to paleoclimate, *Quaternary Research*, **79**, 292–303.

Barbecot, F., Marlin, C., Gibert, E., and Dever, L. (2000), Hydrochemical and isotopic characterisation of the Bathonian and Bajocian coastal aquifer of the Caen area (northern France), *Applied Geochemistry*, **15**, 791–805.

Beyerle, U., Rueedi, J., Leuenberger, M., Aeschbach-Hertig, W., Peeters, F., Kipfer, R. and Dodo, A. (2003), Evidence for periods of wetter and cooler climate in the Sahel between 6 and 40 kyr BP derived from groundwater, *Geophysical Research Letters*, **30**, 1173.

Bouchaou, L., Michelot, J. L., Vengosh, A., Hsissou, Y., Qurtobi, M., Gaye, C. B., Bullen, T. D., and Zuppi, G. M. (2008), Application of multiple isotopic and geochemical tracers for investigation of recharge, salinization, and residence time of water in the Souss–Massa aquifer, southwest of Morocco, *Journal of Hydrology*, **352**, 267–287.

Brown, K. B., McIntosh, J. C., Baker, V. R., and Gosch, D. (2010), Isotopically-depleted late Pleistocene groundwater in Columbia River Basalt aquifers: Evidence for recharge of glacial Lake Missoula floodwaters? *Geophysical Research Letters*, **37**, L21402.

Castany, G., Marce, A., Margat, J., Moussu, H., Vuillaume, Y., and Evin, J. (1974), An environmental isotope study of the groundwater regime in large aquifers, In: *Isotope Techniques in Groundwater Hydrology 1974*, Vol. I.

Celle-Jeanton, H., Huneau, F., Travi, Y., and Edmunds, W. M. (2009), Twenty years of groundwater evolution in the Triassic sandstone aquifer of Lorraine: impacts on baseline water quality, *Applied Geochemistry*, **24**, 1198–1213.

- Chen, Z., Qi, J., Xu, J., Xu, J., Ye, H., and Nan, Y. (2003), Paleoclimatic interpretation of the past 30 ka from isotopic studies of the deep confined aquifer of the North China plain, *Applied Geochemistry*, **18**, 997–1009.
- Chen, Z., Wei, W., Liu, J., Wang, Y., and Chen, J. (2011), Identifying the recharge sources and age of groundwater in the Songnen Plain (Northeast China) using environmental isotopes, *Hydrogeology Journal*, **19**, 163–176.
- Clark, I. D., Fritz, P., Quinn, O. P., Rippon, P. W., Nash, H., and al Said, S. B. B. G. (1987), Modern and fossil groundwater in an arid environment: a look at the hydrogeology of southern Oman, In: *Isotope Techniques in Water Resources Development*.
- Clark, J. F., Davisson, M. L., Hudson, G. B., and Macfarlane, P. A. (1998), Noble gases, stable isotopes, and radiocarbon as tracers of flow in the Dakota aquifer, Colorado and Kansas, *Journal of Hydrology*, **211**, 151–167.
- Clark, J. F., Stute, M., Schlosser, P., Drenkard, S., and Bonani, G. (1997), A tracer study of the Floridan aquifer in southeastern Georgia: Implications for groundwater flow and paleoclimate, *Water Resources Research*, **33**, 281–289.
- Currell, M. J., Cartwright, I., Bradley, D. C., and Han, D. (2010). Recharge history and controls on groundwater quality in the Yuncheng Basin, north China, *Journal of Hydrology*, **385**, 216–229.
- Darling, W. G., and Bath, A. H. (1988), A stable isotope study of recharge processes in the English Chalk, *Journal of Hydrology*, **101**, 31–46.
- Darling, W. G., Edmunds, W. M., and Smedley, P. L. (1997), Isotopic evidence for palaeowaters in the British Isles, *Applied Geochemistry*, **12**, 813–829.
- Dennis, F., Andrews, J. N., Parker, A., Poole, J. and Wolf, M. (1997), Isotopic and noble gas study of Chalk groundwater in the London Basin, England, *Applied Geochemistry*, **12**, 763–773.

- Derwich, L. J., Zouar, K., and Michelot, J. L. (2012), Recharge and paleorecharge of the deep groundwater aquifer system in the Zeroud Basin (Kairouan plain, Central Tunisia), *Quaternary International*, **257**, 56–63.
- Dodo, A., and Zuppi, G. M. (1997), Groundwater flow study in the Bilma–Djado Basin (Niger) by means of environmental isotopes, *Comptes Rendus de l'Academie des Sciences. Serie 2, Sciences de la Terre et des Planetes*, **30**, 845–852.
- Dodo, A., and Zuppi, G. M. (1999), Variabilité climatique durant le Quaternaire dans la nappe du Tarat (Arlit, Niger), *Comptes Rendus de l'Académie des Sciences–Series IIA–Earth and Planetary Science*, **328**, 371–379.
- Douglas, A. A., Osienky, J. L., and Keller, C. K. (2007). Carbon–14 dating of ground water in the Palouse Basin of the Columbia River basalts, *Journal of Hydrology*, **334**, 502–512.
- Dutton, A. R. (1995), Groundwater isotopic evidence for paleorecharge in US High Plains aquifers, *Quaternary Research*, **43**, 221–231.
- Edmunds, W. M. (2009), Palaeoclimate and groundwater evolution in Africa—implications for adaptation and management, *Hydrological Sciences Journal*, **54**, 781–792.
- Edmunds, W. M. et al. (2003), Groundwater evolution in the Continental Intercalaire aquifer of southern Algeria and Tunisia: trace element and isotopic indicators, *Applied Geochemistry*, **18**, 805–822.
- Edmunds, W. M. et al. (2004), Groundwater as an archive of climatic and environmental change: Europe to Africa, in: Past climate variability through Europe and Africa (eds. R.W. Battarbee, F. Gasse, C.E. Stickley), pp. 279–306, Springer, Netherlands.
- Elliot, T., Andrews, J. N., and Edmunds, W. M. (1999), Hydrochemical trends, palaeorecharge and groundwater ages in the fissured Chalk aquifer of the London and Berkshire Basins, UK, *Applied Geochemistry*, **14**, 333–363.

- Fadlelmawla, A., Hadi, K., Zouari, K., and Kulkarni, K. M. (2008), Hydrogeochemical investigations of recharge and subsequent salinization processes at Al-Raudhatain depression in Kuwait, *Hydrological Sciences Journal*, **53**, 204–223.
- Galego Fernandes, P., and Carreira, P. M. (2008), Isotopic evidence of aquifer recharge during the last ice age in Portugal, *Journal of Hydrology*, **361**, 291–308.
- Gat, J. R., and Galai, A. (1982). Groundwaters of the Arava Valley-an isotopic study of their origin and interrelationships, *Israel Journal of Earth Sciences*, **31**, 25–38.
- Geyh, M. A., and Söfner, B. (1989), Groundwater analysis of environmental carbon and other isotopes from the Jakarta Basin Aquifer, Indonesia, *Radiocarbon*, **31**, 919–925.
- Gouvea da Silva, R. B. (1983), Estudo hidroquímico e isotópico das águas subterrâneas do aquífero Botucatu no estado de Sao Paulo, Ph. D. thesis, University of Sao Paulo, Sao Paulo, Brazil.
- Hackley, K. C., Panno, S. V., Anderson, T. F. (2010), Chemical and isotopic indicators of groundwater evolution in the basal sands of a buried bedrock valley in the midwestern United States: Implications for recharge, rock-water interactions, and mixing, *Geological Society of America Bulletin*, **122**, 1047–1066.
- Harrington, G., Stelfox, L., Gardner, W. P., Davies, P., Doble, R., and Cook, P. G. (2011), Surface water–groundwater interactions in the lower Fitzroy River, Western Australia, CSIRO Publications.
- Heaton, T. H. E., Talma, A. S., and Vogel, J. C. (1986), Dissolved gas paleotemperatures and  $^{18}\text{O}$  variations derived from groundwater near Uitenhage, South Africa, *Quaternary Research*, **25**, 79–88.
- Hinsby, K., Harrar, W. G., Nyegaard, P., Konradi, P. B., Rasmussen, E. S., Bidstrup, T., Gregersen, U., Boaretto, E. (2001), The Ribe Formation in western Denmark - Holocene and Pleistocene groundwaters in a coastal Miocene sand aquifer, Geological Society of London, Special Publications, **189**, 29–48.

- Hoque, M. A., and Burgess, W. G. (2012),  $^{14}\text{C}$  dating of deep groundwater in the Bengal Aquifer System, Bangladesh: Implications for aquifer anisotropy, recharge sources and sustainability, *Journal of Hydrology*, **444**, 209–220.
- Huneau, F. et al. (2011), Flow pattern and residence time of groundwater within the south-eastern Taoudeni sedimentary basin (Burkina Faso, Mali), *Journal of Hydrology*, **409**, 423–439.
- Kotler, E., and Burn, C. R. (2000), Cryostratigraphy of the Klondike "muck" deposits, west-central Yukon Territory, *Canadian Journal of Earth Sciences*, **37**, 849–861.
- Kreuzer, A. M., von Rohden, C., Friedrich, R., Chen, Z., Shi, J., Hajdas, I., Kipfer, R., and Aeschbach-Hertig, W. (2009), A record of temperature and monsoon intensity over the past 40 kyr from groundwater in the North China Plain, *Chemical Geology*, **259**, 168–180.
- Külls, C. (2000), Groundwater of the North–Western Kalahari, Namibia. Ph.D. Thesis, Julius–Maximilian University of Würzburg.
- Kulongoski, J. T., Hilton, D. R., and Selaolo, E. T. (2004), Climate variability in the Botswana Kalahari from the late Pleistocene to the present day, *Geophysical Research Letters*, **31**, L10204.
- Kumar, S. U., Sharma, S., Navada, S. V., and Deodhar, A. S. (2009), Environmental isotopes investigation on recharge processes and hydrodynamics of the coastal sedimentary aquifers of Tiruvadanai, Tamilnadu State, India, *Journal of Hydrology*, **364**, 23–39.
- Larsen, F., Owen, R., Dahlin, T., Mangeya, P., and Barmen, G. (2002), A preliminary analysis of the groundwater recharge to the Karoo formations, mid–Zambezi basin, Zimbabwe, *Physics and Chemistry of the Earth*, **27**, 765–772.
- Le Gal La Salle, C., Marlin, C., Savoye, S., and Fontes, J. C. (1996), Geochemistry and  $^{14}\text{C}$  dating of groundwaters from Jurassic aquifers of North Aquitaine Basin (France), *Applied Geochemistry*, **11**, 433–445.

- Le Gal La Salle, C., Marlin, C., Leduc, C., Taupin, J. D., Massault, M., and Favreau, G. (2001), Renewal rate estimation of groundwater based on radioactive tracers  $^3\text{H}$ ,  $^{14}\text{C}$  in an unconfined aquifer in a semi-arid area, Iullemeden Basin, Niger, *Journal of Hydrology*, **254**, 145–156.
- Leaney, F. W., and Allison, G. B. (1986), Carbon–14 and stable isotope data for an area in the Murray Basin: its use in estimating recharge, *Journal of Hydrology*, **88**, 129–145.
- Maduabuchi, C., Faye, S., and Maloszewski, P. (2006), Isotope evidence of palaeorecharge and palaeoclimate in the deep confined aquifers of the Chad Basin, NE Nigeria, *Science of the Total Environment*, **370**, 467–479.
- Majumder, R. K., Halim, M. A., Saha, B. B., Ikawa, R., Nakamura, T., Kagabu, M., and Shimada, J. (2011), Groundwater flow system in Bengal Delta, Bangladesh revealed by environmental isotopes, *Environmental Earth Sciences*, **64**, 1343–1352.
- Martinelli, G., Chahoud, A., Dadomo, A., Fava, A. (2014), Isotopic features of Emilia-Romagna region (North Italy) groundwaters: Environmental and climatological implications, *Journal of Hydrology*, **519**, 1928–1938.
- Mazor, E., Gilad, D., and Fridman, V. (1995). Stagnant aquifer concept Part 2. Small scale artesian systems-Hazeva, Dead Sea Rift Valley, Israel, *Journal of Hydrology*, **173**, 241–261.
- Mehta, S., Fryar, A. E., and Banner, J. L. (2000), Controls on the regional-scale salinization of the Ogallala aquifer, Southern High Plains, Texas, USA, *Applied Geochemistry*, **15**, 849–864.
- Meyer, H., Derevyagin, A. Y., Siegert, C., and Hubberten, H. W. (2002), Paleoclimate studies on Bykovsky Peninsula, North Siberia-hydrogen and oxygen isotopes in ground ice. *Polarforschung*, **70**, 37–51.
- Noseck, U. et al. (2009), Carbon chemistry and groundwater dynamics at natural analogue site Ruprechtov, Czech Republic: insights from environmental isotopes, *Applied Geochemistry*, **24**, 1765–1776.

- Patterson, L. J. et al. (2005), Cosmogenic, radiogenic, and stable isotopic constraints on groundwater residence time in the Nubian Aquifer, Western Desert of Egypt, *Geochemistry, Geophysics, Geosystems*, **6**, Q01005.
- Phillips, F. M., Peeters, L. A., Tansey, M. K., and Davis, S. N. (1986), Paleoclimatic inferences from an isotopic investigation of groundwater in the central San Juan Basin, New Mexico, *Quaternary Research*, **26**, 179–193.
- Rahube, T. B. (2003), Recharge and groundwater resources evaluation of the Lokalan–Ncojane Basin (Botswana) using numerical modelling, MSc Thesis, *International Institute for Geoinformation Science and Earth Observation*, Enschede, Netherlands, 104.
- Robinson, B. W., and Gunatilaka, A. (1991), Stable isotope studies and the hydrological regime of sabkhas in southern Kuwait, Arabian Gulf, *Sedimentary Geology*, **73**, 141–159.
- Salati, E., Menezes Leal, J., and Mendes Campos, M. (1974), Environmental isotopes used in a hydrogeological study of northeastern Brazil, In: *Isotope Techniques in Groundwater Hydrology 1974*, Vol. I. 379–398.
- Samborska, K., Rózkowski, A., and Małoszewski, P. (2013), Estimation of groundwater residence time using environmental radioisotopes ( $^{14}\text{C}$ , T) in carbonate aquifers, southern Poland, *Isotopes in Environmental and Health Studies*, **49**, 73–97.
- Schlegel, M. E., Mayo, A. L., Nelson, S., Tingey, D., Henderson, R., and Eggett, D. (2009), Paleo-climate of the Boise area, Idaho from the last glacial maximum to the present based on groundwater  $\delta^2\text{H}$  and  $\delta^{18}\text{O}$  compositions, *Quaternary Research*, **71**, 172–180.
- Shehata, M., and Al-Ruwaih, F. (1999), Major ions geochemistry and environmental isotope study of the Nubian Aquifer system, Dakhla Oasis, Western Desert, Egypt, *Arabian Journal for Science and Engineering*, **24**, 43–58.
- Sikdar, P. K., and Sahu, P. (2009), Understanding wetland sub-surface hydrology using geologic and isotopic signatures, *Hydrology and Earth System Sciences Discussions*, **6**, 3143–3173.

- Stadler, S., Geyh, M. A., Ploethner, D., and Koeniger, P. (2012), The deep Cretaceous aquifer in the Aleppo and Steppe basins of Syria: assessment of the meteoric origin and geographic source of the groundwater, *Hydrogeology Journal*, **20**, 1007–1026.
- Stute, M., and Deak, J. (1989), Environmental isotope study  $^{14}\text{C}$ ,  $^{13}\text{C}$ ,  $^{18}\text{O}$ , D, noble gases on deep groundwater circulation systems in Hungary with reference to paleoclimate, *Radiocarbon*, **31**, 902–918.
- Stute, M., Clark, J. F., Schlosser, P., Broecker, W. S., and Bonani, G. (1995a), A 30,000 yr continental paleotemperature record derived from noble gases dissolved in groundwater from the San Juan Basin, New Mexico, *Quaternary Research*, **43**, 209–220.
- Sukhija, B. S., Reddy, D. V., and Nagabhushanam, P. (1998), Isotopic fingerprints of paleoclimates during the last 30,000 years in deep confined groundwaters of Southern India, *Quaternary Research*, **50**, 252–260.
- van Geldern, R., Baier, A., Subert, H. L., Kowol, S., Balk, L., Barth, J. A. C. (2014), Pleistocene paleo-groundwater as a pristine fresh water resource in southern Germany – evidence from stable and radiogenic isotopes, *Science of the Total Environment*, **496**, 107–115.
- Varsányi, I., Palcsu, L., and Kovács, L. Ó. (2011), Groundwater flow system as an archive of palaeotemperature: Noble gas, radiocarbon, stable isotope and geochemical study in the Pannonian Basin, Hungary, *Applied Geochemistry*, **26**, 91–104.
- Walraevens, K. (1990), Natural-isotope research on groundwater from the semi-confined Ledo-Paniselian aquifer in Belgium: application of  $^{14}\text{C}$ -correction methods. *Natuurwetenschappelijk Tijdschrift*, **72**, 79–89.
- Walraevens, K., Van Camp, M., Lermytte, J., Van Der Kemp, W. J. M., and Loosli, H. H. (2001), Pleistocene and Holocene groundwaters in the freshening Ledo-Paniselian aquifer in Flanders, Belgium, *Geological Society, London, Special Publications*, **189**, 49–70.
- Weyhenmeyer, C. E., Burns, S. J., Waber, H. N., Aeschbach-Hertig, W., Kipfer, R., Loosli, H. H., and Matter, A. (2000), Cool glacial temperatures and changes in moisture source recorded in Oman groundwaters, *Science*, **287**, 842–845.

- Weyhenmeyer, C. E., Burns, S. J., Waber, H. N., Macumber, P. G., and Matter, A. (2002), Isotope study of moisture sources, recharge areas, and groundwater flow paths within the eastern Batinah coastal plain, Sultanate of Oman, *Water Resources Research*, **38**, 1184.
- Yechieli, Y., Kafri, U., and Sivan, O. (2009), The inter-relationship between coastal sub-aquifers and the Mediterranean Sea, deduced from radioactive isotopes analysis, *Hydrogeology Journal*, **17**, 265–274.
- Zuber, A., Weise, S. M., Motyka, J., Osenbrück, K., and Róžański, K. (2004), Age and flow pattern of groundwater in a Jurassic limestone aquifer and related Tertiary sands derived from combined isotope, noble gas and chemical data, *Journal of Hydrology*, **286**, 87–112.
- References: Speleothem data**
- Asmerom, Y., Polyak, V. J., and Burns, S. J. (2010), Variable winter moisture in the southwestern United States linked to rapid glacial climate shifts, *Nature Geoscience*, **3**, 114–117.
- Bar-Matthews, M., Ayalon, A., Gilmour, M., Matthews, A., and Hawkesworth, C. (2003), Sea-land oxygen isotopic relationships from planktonic foraminifera and speleothems in the Eastern Mediterranean region and their implication for paleorainfall during interglacial intervals, *Geochimica et Cosmochimica Acta*, **67**, 3181–3199.
- Cai, Y., Tan, L., Cheng, H., An, Z., Edwards, R. L., Kelly, M. J., Kong, X., and Wang, X. (2010), The variation of summer monsoon precipitation in central China since the last deglaciation, *Earth and Planetary Science Letters*, **291**, 21–31.
- Cruz, F. W., Burns, S. J., Karmann, I., Sharp, W. D., Vuille, M., Cardoso, A. O., Ferrari, J. A., Dias, P. L. S., and Viana, O. (2005), Insolation-driven changes in atmospheric circulation over the past 116,000 years in subtropical Brazil, *Nature*, **434**, 63–66.
- Dykoski, C. A., Edwards, R. L., Cheng, H., Yuan, D., Cai, Y., Zhang, M., Lin, Y., Qing, J., An, Z., and Revenaugh, J. (2005), A high-resolution, absolute-dated Holocene and deglacial Asian monsoon record from Dongge Cave, China, *Earth and Planetary Science Letters*, **233**, 71–86.

762 Fleitmann, D. *et al.* (2009), Timing and climatic impact of Greenland interstadials recorded in  
763 stalagmites from northern Turkey, *Geophysical Research Letters*, **36**, L19707.

764 Frumkin, A., Ford, D. C., and Schwarcz, H. P. (1999), Continental oxygen isotopic record of the  
765 last 170,000 years in Jerusalem, *Quaternary Research*, **51**, 317–327.

766 Holmgren, K., Lee-Thorp, J. A., Cooper, G. R., Lundblad, K., Partridge, T. C., Scott, L.,  
767 Sithaldeen, R., Talma, A. S., and Tyson, P. D. (2003), Persistent millennial-scale climatic  
768 variability over the past 25,000 years in Southern Africa, *Quaternary Science Reviews*, **22**,  
769 2311–2326.

770 Partin, J. W., Cobb, K. M., Adkins, J. F., Clark, B., and D. P. Fernandez (2007), Millennial-scale  
771 trends in west Pacific warm pool hydrology since the Last Glacial Maximum, *Nature*, **449**, 452–  
772 455.

773 Shakun, J. D., Burns, S. J., Fleitmann, D., Kramers, J., Matter, A., and Al-Subary, A. (2007), A  
774 high-resolution, absolute-dated deglacial speleothem record of Indian Ocean climate from  
775 Socotra Island, Yemen, *Earth and Planetary Science Letters*, **259**, 442–456.

776 Wagner, J. D. M., Cole, J. E., Beck, J. W., Patchett, P. J., Henderson, G. M., and Barnett, H. R.  
777 (2010), Moisture variability in the southwestern United States linked to abrupt glacial climate  
778 change, *Nature Geoscience* **3**, 110–113.

779 Wang, X. F. *et al.* (2007), Millennial-scale precipitation changes in southern Brazil over the past  
780 90,000 years, *Geophysical Research Letters*, **34**, L23701.

781 Wang, Y. J., Cheng, H., Edwards, R. L., An, Z. S., Wu, J. Y., Shen, C-C., and Dorale, J. A.  
782 (2001), A high-resolution absolute-dated late pleistocene monsoon record from Hulu Cave,  
783 China, *Science*, **294**, 2345–2348.

784 Williams, P. W., Neil, H. L., and Zhao, J. X. (2010), Age frequency distribution and revised  
785 stable isotope curves for New Zealand speleothems: palaeoclimatic implications, *International*  
786 *Journal of Speleology*, **39**, 99–112.

787 Yang, Y., Yuan, D., Cheng, H., Zhang, M., Qin, J., Lin, Y., XiaoYan, Z. and Edwards, R. L.  
788 (2010), Precise dating of abrupt shifts in the Asian Monsoon during the last deglaciation based  
789 on stalagmite data from Yamen Cave, Guizhou Province, China, *Science China Earth Sciences*,  
790 **53**, 633–641.

791 Yuan, D. et al. (2004), Timing, Duration, and Transitions of the Last Interglacial Asian  
792 Monsoon, *Science*, **23**, 575–578.

793 **References: Ice core data**

794 Blunier, T., and Brook, E. J. (2001), Timing of millennial-scale climate change in Antarctica and  
795 Greenland during the last glacial period, *Science*, **291**, 109–112.

796 Buiron, D. et al. (2011), TALDICE-1 age scale of the Talos Dome deep ice core, East Antarctica,  
797 *Climate of the Past*, **7**, 1–16.

798 EPICA community members (2006), One-to-one coupling of glacial climate variability in  
799 Greenland and Antarctica. *Nature*, **444**, 195–198.

800 Kawamura, K., et al. (2007), Northern Hemisphere forcing of climatic cycles in Antarctica over  
801 the past 360,000 years, *Nature*, **448**, 912–916.

802 Paterson, W. S. B., Koerner, R. M., Fisher, D., Johnsen, S. J., Clausen, H. B., Dansgaard, W.,  
803 Bucher, P., and Oeschger, H. (1977), An oxygen-isotope climatic record from the Devon Island  
804 ice cap, arctic Canada, *Nature*, **266**, 508–511.

805 Pedro, J. B., Van Ommen, T. D., Rasmussen, S. O., Morgan, V. I., Chappellaz, J., Moy, A. D.,  
806 Masson-Delmotte, V. and Delmotte, M. (2011), The last deglaciation: timing the bipolar seesaw,  
807 *Climate of the Past*, **7**, 671–683.

808 Thompson, L. G. et al. (1998), A 25,000-year tropical climate history from Bolivian ice cores.  
809 *Science*, **282**, 1858–1864.

810 Thompson, L. G., Mosley-Thompson, E., Davis, M. E., Lin, P. N., Henderson, K. A., Cole-Dai,  
811 J., Bolzan, J. F., and Liu, K. B. (1995), Late glacial stage and Holocene tropical ice core records  
812 from Huascaran, Peru, *Science*, **269**, 46–50.

813 Thompson, L. O., Yao, T., Davis, M. E., Henderson, K. A., Mosley-Thompson, E., Lin, P. N.,  
814 Beer, J., Synal, H.-A., Cole-Dai, J., and Bolzan, J. F. (1997), Tropical climate instability: The  
815 last glacial cycle from a Qinghai-Tibetan ice core, *Science*, **276**, 1821–1825.

816 Vinther, B. M. et al. (2006), A synchronized dating of three Greenland ice cores throughout the  
817 Holocene, *Journal of Geophysical Research*, **111**, D13102.

818 Vinther, B. M., Clausen, H. B., Fisher, D. A., Koerner, R. M., Johnsen, S. J., Andersen, K. K.,  
819 Dahl-Jensen, D., Rasmussen, S. O., Steffensen, J. P., and Svensson, A. M. (2008), Synchronizing  
820 ice cores from the Renland and Agassiz ice caps to the Greenland Ice Core Chronology, *Journal*  
821 *of Geophysical Research: Atmospheres*, **113**, D08115.
